# Supplementary material for: Государственно-церковные отношения в 1940-1950-х годах: региональный аспект (по материалам центрального государственного архива Удмуртской Республики)
Source: Royal Society of Chemistry journal article supplement (doi:10.1039/d2ob00326k), 2012-01-01

# Diastereoselective Construction of Tetracyclic Chromanes *via* Triply Annulative Strategy

Zhishun Tang,<sup>a</sup> Linghong Chen,<sup>a</sup> Pengxuan Yin,<sup>a</sup> Lu Yang,<sup>a</sup> Zhichuan Shi,<sup>a</sup> Zhigang Zhao,<sup>a</sup>  
Ling Ye\*<sup>b</sup> and Xuefeng Li \*<sup>a</sup>

<sup>a</sup> Key Laboratory of General Chemistry of the National Ethnic Affairs Commission, Key Laboratory of Pollution Control Chemistry and Environmental Functional Materials for Qinghai-Tibet Plateau of the National Ethnic Affairs Commission, School of Chemistry and Environment, Southwest Minzu University, Chengdu 610041, China.

<sup>b</sup> Faculty of Geosciences and Environmental Engineering, Southwest Jiaotong University, Chengdu 610031, China.

E-mail: yeling@swjtu.edu.cn; lixuefeng@swun.edu.cn

## Table of contents

|                                                                                    |    |
|------------------------------------------------------------------------------------|----|
| 1. General Information .....                                                       | 2  |
| 2. General Procedure for the Synthesis of Enolate-tethered dienones <b>1</b> ..... | 2  |
| 3. General Procedure for the triple Michael/aldol Cascade Reaction .....           | 13 |
| 4. Reduction of ester group of <b>3a</b> .....                                     | 24 |
| 5. Reduction of <b>3a</b> to primary amine <b>5</b> .....                          | 25 |
| 6. X-ray crystallographic analysis of <b>3d</b> (CCDC 2131464) .....               | 26 |
| 7. Reference .....                                                                 | 27 |
| 8. NMR spectra of products .....                                                   | 28 |

## 1. General Information

$^1\text{H}$  and  $^{13}\text{C}$  NMR spectra were recorded on Varian 400 MHz spectrometers. Chemical shifts ( $\delta$ ) were reported in ppm downfield from  $\text{CDCl}_3$  ( $\delta = 7.26$  ppm) or  $\text{DMSO-d}_6$  ( $\delta = 2.50$  ppm) for  $^1\text{H}$  NMR and relative to the central  $\text{CDCl}_3$  resonance ( $\delta = 77.0$  ppm) or  $\text{DMSO-d}_6$  ( $\delta = 39.5$  ppm) for  $^{13}\text{C}$  NMR spectroscopy. Coupling constants ( $J$ ) were given in Hz. An ESI-HRMS spectrometer was measured with a Thermo Scientific LTQ Orbitrap XL mass spectrometer. Commercially available compounds were used without further purification. Solvents were dried according to standard procedures. Column chromatography was performed with silica gel (300-400 mesh).

## 2. General Procedure for the Synthesis of Enolate-tethered dienones 1

(2-Hydroxyaryl)divinyl ketones were synthesized via condensation reaction reported in the literature.<sup>1</sup>

To a solution of (2-hydroxyaryl)divinyl ketone (5 mmol) in anhydrous MeCN (25 mL) was added ethyl propiolate (1.1 equiv) and *N*-methylmorpholine (6 mol%) at 0 °C, and the resulting solution was then allowed to stir at rt for due reaction time (about 24 h). Once divinyl ketone was consumed according to the TLC, the solvent was removed under reduced pressure. Purification of the residue by column chromatography (Petroleum ether/Ethyl acetate = 30:1, v/v) delivered the pure enolate substituted dienone **1**.

### Ethyl (*E*)-3-(2-((1*E*,4*E*)-5-(4-fluorophenyl)-3-oxopenta-1,4-dien-1-yl)phenoxy)acrylate (**1a**).

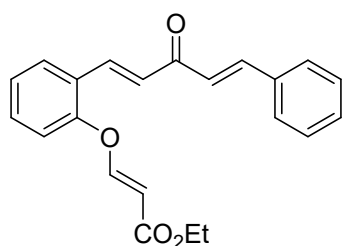

The product **1a** was obtained as a pale yellow oil (1.46 g, 84% yield).  $^1\text{H}$  NMR (400 MHz,  $\text{CDCl}_3$ )  $\delta$  (ppm): 7.85 (d,  $J = 16.0$  Hz, 1H), 7.74 (d,  $J = 12.4$  Hz, 1H), 7.68 (d,  $J = 15.6$  Hz, 1H), 7.65 (d,  $J = 7.2$  Hz, 1H), 7.56-7.53 (m, 2H), 7.37-7.34 (m, 4H), 7.18 (t,  $J = 7.6$  Hz, 1H), 7.07 (d,  $J = 16.0$  Hz, 1H), 7.02 (d,  $J = 8.4$  Hz, 1H), 7.01 (d,  $J = 16.0$  Hz, 1H), 5.54 (d,  $J = 12.4$  Hz, 1H), 4.15 (q,  $J = 7.0$  Hz, 2H), 1.24 (t,  $J = 7.2$  Hz, 3H);  $^{13}\text{C}$  NMR (100 MHz,  $\text{CDCl}_3$ )  $\delta$  (ppm): 188.6, 166.7, 158.6, 154.3, 143.5, 136.2, 134.6, 131.8, 130.6, 128.9, 128.5, 128.4, 127.4, 126.0, 125.4, 125.3, 118.6, 103.2, 60.2, 14.3; IR (KBr): 3069, 2996, 1716, 1620, 1492, 1221, 1106, 1043, 988, 853, 755  $\text{cm}^{-1}$ ; HRMS (ESI)  $m/z$ :  $[\text{M}+\text{H}]^+$  calcd. for  $\text{C}_{22}\text{H}_{21}\text{O}_4$  349.1434, found 349.1433.

**Ethyl (E)-3-(2-((1E,4E)-5-(4-fluorophenyl)-3-oxopenta-1,4-dien-1-yl)phenoxy)acrylate (1b).**

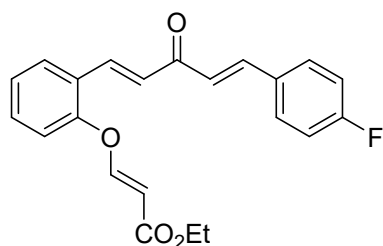

The product **1b** was obtained as a pale yellow oil (1.41 g, 77% yield). <sup>1</sup>H NMR (400 MHz, CDCl<sub>3</sub>) δ (ppm): 7.87 (d, *J* = 16.4 Hz, 1H), 7.77 (d, *J* = 12.0 Hz, 1H), 7.68 (d, *J* = 7.2 Hz, 1H), 7.67 (d, *J* = 15.6 Hz, 1H), 7.58 (dd, *J* = 8.6, 5.4 Hz, 2H), 7.41 (t, *J* = 8.4 Hz, 1H), 7.23 (t, *J* = 7.4 Hz, 1H), 7.10-7.06 (m, 4H), 6.97 (d, *J* = 16.0 Hz, 1H), 5.56 (d, *J* = 12.0 Hz, 1H), 4.13 (q, *J* = 7.2 Hz, 2H), 1.30 (t, *J* = 7.0 Hz, 3H); <sup>13</sup>C NMR (100 MHz, CDCl<sub>3</sub>) δ (ppm): 188.5, 166.7, 164.0 (<sup>1</sup>*J*<sub>C-F</sub> = 250.5 Hz), 158.6, 154.3, 142.2, 136.3, 131.7, 130.9 (<sup>4</sup>*J*<sub>C-F</sub> = 3.3 Hz), 130.2 (<sup>3</sup>*J*<sub>C-F</sub> = 8.5 Hz), 128.5, 127.4, 125.9, 125.4, 124.9, 118.6, 116.0 (<sup>2</sup>*J*<sub>C-F</sub> = 21.8 Hz), 103.2, 60.2, 14.2; <sup>19</sup>F NMR (376 MHz, CDCl<sub>3</sub>) δ (ppm): -108.9; IR (KBr): 3076, 2997, 1718, 1618, 1516, 1233, 1108, 1046, 986, 855, 753 cm<sup>-1</sup>; HRMS (ESI) *m/z*: [M+H]<sup>+</sup> calcd. for C<sub>22</sub>H<sub>20</sub>FO<sub>4</sub> 367.1340, found 367.1339.

**Ethyl (E)-3-(2-((1E,4E)-5-(2-chlorophenyl)-3-oxopenta-1,4-dien-1-yl)phenoxy)acrylate (1c).**

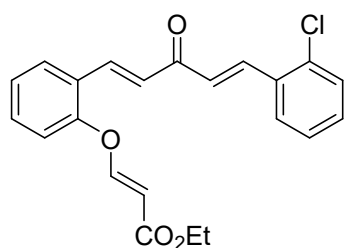

The product **1c** was obtained as a pale yellow oil (1.53 g, 80% yield). <sup>1</sup>H NMR (400 MHz, CDCl<sub>3</sub>) δ (ppm): 8.10 (d, *J* = 16.0 Hz, 1H), 7.88 (d, *J* = 16.0 Hz, 1H), 7.78 (d, *J* = 12.0 Hz, 1H), 7.71-7.68 (m, 2H), 7.44-7.40 (m, 2H), 7.32-7.29 (m, 2H), 7.24 (t, *J* = 8.0 Hz, 1H), 7.16 (d, *J* = 16.4 Hz, 1H), 7.08 (dd, *J* = 8.4, 0.8 Hz, 1H), 7.00 (d, *J* = 16.0 Hz, 1H), 5.58 (d, *J* = 12.4 Hz, 1H), 4.19 (q, *J* = 7.2 Hz, 2H), 1.27 (t, *J* = 7.0 Hz, 3H); <sup>13</sup>C NMR (100 MHz, CDCl<sub>3</sub>) δ (ppm): 188.7, 166.8, 158.6, 154.4, 139.1, 136.8, 135.3, 132.9, 131.8, 131.2, 130.2, 128.7, 128.0, 127.6, 127.1, 126.8, 125.8, 125.4, 118.6, 103.2, 60.2, 14.2; IR (KBr): 3081, 2989, 1720, 1656, 1487, 1230, 1127, 1047, 985, 850, 761 cm<sup>-1</sup>; HRMS (ESI) *m/z*: [M+H]<sup>+</sup> calcd. for C<sub>22</sub>H<sub>20</sub>ClO<sub>4</sub> 383.1045, found 383.1039.

**Ethyl (E)-3-(2-((1E,4E)-5-(3-chlorophenyl)-3-oxopenta-1,4-dien-1-yl)phenoxy)acrylate(1d).**

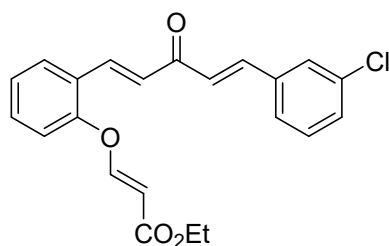

The product **1d** was obtained as a pale yellow oil (1.80 g, 94% yield). <sup>1</sup>H NMR (400 MHz, CDCl<sub>3</sub>) δ (ppm): 7.87 (d, *J* = 16.4 Hz, 1H), 7.76 (d, *J* = 12.4 Hz, 1H), 7.67 (dd, *J* = 8.0, 1.6 Hz, 1H), 7.61 (d, *J* = 16.0 Hz, 1H), 7.55 (t, *J* = 1.6 Hz, 1H), 7.45-7.42 (m, 1H), 7.39 (dd, *J* = 7.6, 1.2 Hz, 1H), 7.34-

7.28 (m, 2H), 7.22 (t,  $J = 7.4$  Hz, 1H), 7.07 (d,  $J = 16.0$  Hz, 1H), 7.06 (dd,  $J = 8.0, 0.8$  Hz, 1H), 7.02 (d,  $J = 16.0$  Hz, 1H), 5.56 (d,  $J = 12.4$  Hz, 1H), 4.17 (q,  $J = 7.2$  Hz, 2H), 1.26 (t,  $J = 7.2$  Hz, 3H);  $^{13}\text{C}$  NMR (100 MHz,  $\text{CDCl}_3$ )  $\delta$  (ppm): 188.2, 166.6, 158.4, 154.3, 141.7, 136.6, 136.4, 134.8, 131.8, 130.2, 130.0, 128.4, 127.9, 127.2, 126.5, 126.3, 125.7, 125.3, 118.5, 103.2, 60.1, 14.2; IR (KBr): 3080, 2992, 1719, 1655, 1488, 1231, 1126, 1045, 987, 858, 762  $\text{cm}^{-1}$ ; HRMS (ESI)  $m/z$ :  $[\text{M}+\text{H}]^+$  calcd. for  $\text{C}_{22}\text{H}_{20}\text{ClO}_4$  383.1045, found 383.1045.

**Ethyl (E)-3-(2-((1E,4E)-5-(4-chlorophenyl)-3-oxopenta-1,4-dien-1-yl)phenoxy)acrylate (1e).**

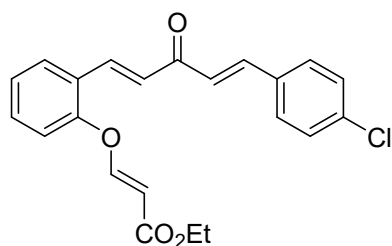

The product **1e** was obtained as a pale yellow oil (1.34 g, 70% yield).  $^1\text{H}$  NMR (400 MHz,  $\text{CDCl}_3$ )  $\delta$  (ppm): 7.87 (d,  $J = 16.4$  Hz, 1H), 7.77 (d,  $J = 12.0$  Hz, 1H), 7.68 (d,  $J = 8.8$  Hz, 1H), 7.65 (d,  $J = 16.0$  Hz, 1H), 7.51 (d,  $J = 8.4$  Hz, 2H), 7.41 (t,  $J = 7.8$  Hz, 1H), 7.36 (d,  $J = 8.8$  Hz, 2H), 7.23 (t,  $J = 7.6$  Hz, 1H), 7.08 (d,  $J = 8.0$  Hz, 1H), 7.07 (d,  $J = 16.0$  Hz, 1H), 7.01 (d,  $J = 16.0$  Hz, 1H), 5.56 (d,  $J = 12.0$  Hz, 1H), 4.18 (q,  $J = 7.2$  Hz, 2H), 1.27 (t,  $J = 7.2$  Hz, 3H);  $^{13}\text{C}$  NMR (100 MHz,  $\text{CDCl}_3$ )  $\delta$  (ppm): 188.4, 166.7, 158.5, 154.3, 140.0, 136.4, 136.3, 133.1, 131.8, 129.5, 129.1, 128.5, 127.4, 125.8, 125.5, 125.4, 118.6, 103.2, 60.2, 14.2; IR (KBr): 3096, 2984, 1716, 1663, 1492, 1231, 1124, 1034, 981, 854, 755  $\text{cm}^{-1}$ ; HRMS (ESI)  $m/z$ :  $[\text{M}+\text{H}]^+$  calcd. for  $\text{C}_{22}\text{H}_{20}\text{ClO}_4$  383.1045, found 383.1043.

**Ethyl (E)-3-(2-((1E,4E)-5-(2-bromophenyl)-3-oxopenta-1,4-dien-1-yl)phenoxy)acrylate (1f).**

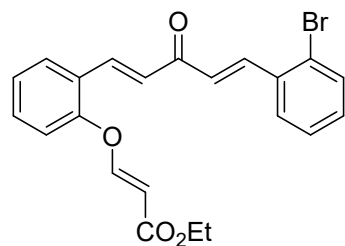

The product **1f** was obtained as a pale yellow oil (1.49 g, 70% yield).  $^1\text{H}$  NMR (400 MHz,  $\text{CDCl}_3$ )  $\delta$  (ppm): 8.06 (d,  $J = 16.0$  Hz, 1H), 7.88 (d,  $J = 16.4$  Hz, 1H), 7.79 (d,  $J = 12.4$  Hz, 1H), 7.68 (dd,  $J = 7.4, 1.4$  Hz, 2H), 7.61 (d,  $J = 8.0$  Hz, 1H), 7.42 (t,  $J = 7.6$  Hz, 1H), 7.34 (t,  $J = 7.4$  Hz, 1H), 7.26-7.21 (m, 2H), 7.18 (d,  $J = 16.0$  Hz, 1H), 7.08 (d,  $J = 8.4$  Hz, 1H), 6.95 (d,  $J = 16.0$  Hz, 1H), 5.59 (d,  $J = 12.4$  Hz, 1H), 4.19 (q,  $J = 7.2$  Hz, 2H), 1.27 (t,  $J = 7.2$  Hz, 3H);  $^{13}\text{C}$  NMR (100 MHz,  $\text{CDCl}_3$ )  $\delta$  (ppm): 188.7, 166.7, 158.5, 154.4, 141.7, 136.8, 134.6, 133.4, 131.8, 131.3, 128.8, 128.2, 127.74, 127.70, 126.7, 125.82, 125.77, 125.4, 118.6, 103.3, 60.2, 14.2; IR (KBr): 3079, 2994, 1720, 1653, 1482, 1228, 1125, 1039, 986, 849, 760  $\text{cm}^{-1}$ ; HRMS (ESI)  $m/z$ :  $[\text{M}+\text{H}]^+$  calcd. for  $\text{C}_{22}\text{H}_{20}\text{BrO}_4$  427.0539,

found 427.0538.

**Ethyl (E)-3-(2-((1E,4E)-5-(4-bromophenyl)-3-oxopenta-1,4-dien-1-yl)phenoxy)acrylate (1g).**

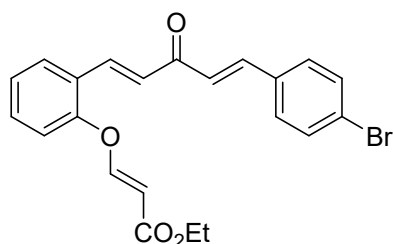

The product **1g** was obtained as a pale yellow oil (1.71 g, 80% yield). <sup>1</sup>H NMR (400 MHz, CDCl<sub>3</sub>)  $\delta$  (ppm): 7.88 (d,  $J$  = 16.4 Hz, 1H), 7.78 (d,  $J$  = 12.4 Hz, 1H), 7.69 (dd,  $J$  = 7.8, 1.4 Hz, 1H), 7.64 (d,  $J$  = 15.6 Hz, 1H), 7.53 (d,  $J$  = 8.4 Hz, 2H), 7.46 (d,  $J$  = 8.4 Hz, 2H), 7.42 (dd,  $J$  = 7.8, 1.0 Hz, 1H),

7.24 (t,  $J$  = 7.8 Hz, 1H), 7.09 (dd,  $J$  = 8.0, 0.8 Hz, 1H), 7.08 (d,  $J$  = 16.0 Hz, 1H), 7.04 (d,  $J$  = 16.0 Hz, 1H), 5.57 (d,  $J$  = 12.4 Hz, 1H), 4.19 (q,  $J$  = 7.0 Hz, 2H), 1.28 (t,  $J$  = 7.0 Hz, 3H); <sup>13</sup>C NMR (100 MHz, CDCl<sub>3</sub>)  $\delta$  (ppm): 188.4, 166.7, 158.6, 154.4, 142.1, 136.5, 133.6, 132.1, 131.8, 129.7, 128.5, 127.4, 125.9, 125.7, 125.4, 124.8, 118.7, 103.2, 60.2, 14.2; IR (KBr): 3084, 2984, 1716, 1660, 1489, 1230, 1120, 984, 810, 756 cm<sup>-1</sup>; HRMS (ESI)  $m/z$ : [M+H]<sup>+</sup> calcd. for C<sub>22</sub>H<sub>20</sub>BrO<sub>4</sub> 427.0539, found 427.0535.

**Ethyl (E)-3-(2-((1E,4E)-5-(4-methoxyphenyl)-3-oxopenta-1,4-dien-1-yl)phenoxy)acrylate (1h).**

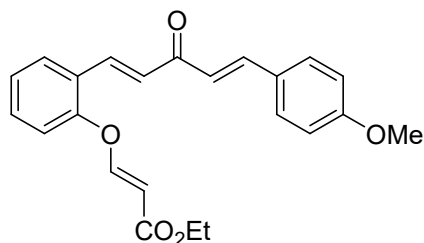

The product **1h** was obtained as a pale yellow oil (1.71 g, 90% yield). <sup>1</sup>H NMR (400 MHz, CDCl<sub>3</sub>)  $\delta$  (ppm): 7.86 (d,  $J$  = 16.4 Hz, 1H), 7.78 (d,  $J$  = 12.4 Hz, 1H), 7.70 (d,  $J$  = 15.6 Hz, 1H), 7.69 (dd,  $J$  = 7.8, 1.4 Hz, 1H), 7.54 (d,  $J$  = 8.8 Hz, 2H), 7.40 (td,  $J$  = 7.6, 1.2 Hz, 1H), 7.22 (t,  $J$  =

7.4 Hz, 1H), 7.09 (d,  $J$  = 16.0 Hz, 1H), 7.07 (dd,  $J$  = 8.2, 0.6 Hz, 1H), 6.94-6.90 (m, 3H), 5.56 (d,  $J$  = 12.4 Hz, 1H), 4.18 (q,  $J$  = 7.2 Hz, 2H), 3.82 (s, 3H), 1.27 (t,  $J$  = 7.0 Hz, 3H); <sup>13</sup>C NMR (100 MHz, CDCl<sub>3</sub>)  $\delta$  (ppm): 188.6, 166.7, 161.6, 158.7, 154.2, 143.4, 135.7, 131.5, 130.1, 128.4, 127.6, 127.3, 126.1, 125.4, 123.1, 118.6, 114.3, 103.1, 60.1, 55.3, 14.2; IR (KBr): 3082, 3002, 1728, 1662, 1621, 1489, 1229, 1108, 987, 815, 753 cm<sup>-1</sup>; HRMS (ESI)  $m/z$ : [M+H]<sup>+</sup> calcd. for C<sub>23</sub>H<sub>23</sub>O<sub>5</sub> 379.1540, found 379.1537.

**Ethyl (E)-3-(2-((1E,4E)-3-oxo-5-(*o*-tolyl)penta-1,4-dien-1-yl)phenoxy)acrylate (1i).**

The product **1i** was obtained as a pale yellow oil (1.69 g, 93% yield). <sup>1</sup>H NMR (400 MHz, CDCl<sub>3</sub>)  $\delta$  (ppm): 8.03 (d,  $J$  = 15.6 Hz, 1H), 7.89 (d,  $J$  = 16.4 Hz, 1H), 7.79 (d,  $J$  = 12.4 Hz, 1H), 7.69 (d,  $J$  = 7.6 Hz, 1H), 7.64 (d,  $J$  = 7.6 Hz, 1H), 7.42 (t,  $J$  = 7.8 Hz, 1H), 7.31-7.20 (m, 4H), 7.10 (d,  $J$  = 16.0

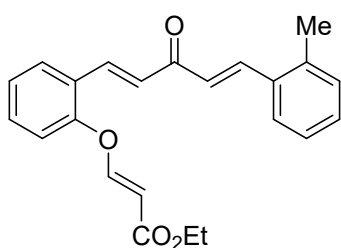

Hz, 1H), 7.08 (d,  $J = 8.0$  Hz, 1H), 6.99 (d,  $J = 16.0$  Hz, 1H), 5.57 (d,  $J = 12.4$  Hz, 1H), 4.19 (q,  $J = 7.2$  Hz, 2H), 2.46 (s, 3H), 1.28 (t,  $J = 7.2$  Hz, 3H);  $^{13}\text{C}$  NMR (100 MHz,  $\text{CDCl}_3$ )  $\delta$  (ppm): 188.7, 166.7, 158.6, 154.3, 141.1, 138.1, 136.2, 133.6, 131.7, 130.8, 130.2, 128.5, 127.7, 126.31, 126.28, 126.09, 125.93, 125.4, 118.6, 103.1, 60.1, 19.8, 14.2; IR (KBr): 3078, 2991, 1719, 1654, 1490, 1230, 1046, 986, 849, 762  $\text{cm}^{-1}$ ; HRMS (ESI)  $m/z$ :  $[\text{M}+\text{H}]^+$  calcd. for  $\text{C}_{23}\text{H}_{23}\text{O}_4$  363.1591, found 363.1587.

**Ethyl (E)-3-(2-((1E,4E)-3-oxo-5-(*m*-tolyl)penta-1,4-dien-1-yl)phenoxy)acrylate (1j).** The

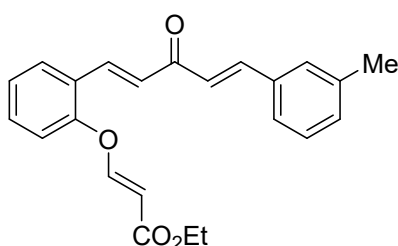

product **1j** was obtained as a pale yellow oil (1.67 g, 92% yield).  $^1\text{H}$  NMR (400 MHz,  $\text{CDCl}_3$ )  $\delta$  (ppm): 7.88 (d,  $J = 16.4$  Hz, 1H), 7.79 (d,  $J = 12.4$  Hz, 1H), 7.70 (d,  $J = 16.0$  Hz, 1H), 7.69 (dd,  $J = 7.6, 1.2$  Hz, 1H), 7.43-7.39 (m, 3H), 7.29 (t,  $J = 7.8$  Hz, 1H), 7.24 (t,  $J = 7.4$  Hz, 1H), 7.21 (d,  $J = 7.2$  Hz, 1H), 7.11 (d,  $J = 16.0$  Hz, 1H), 7.08 (d,  $J = 8.0$  Hz, 1H), 7.04 (d,  $J = 16.0$  Hz, 1H), 5.57 (d,  $J = 12.0$  Hz, 1H), 4.19 (q,  $J = 7.2$  Hz, 2H), 2.38 (s, 3H), 1.28 (t,  $J = 7.0$  Hz, 3H);  $^{13}\text{C}$  NMR (100 MHz,  $\text{CDCl}_3$ )  $\delta$  (ppm): 188.7, 166.7, 158.6, 154.3, 143.7, 138.5, 136.1, 134.5, 131.6, 131.4, 129.0, 128.7, 128.4, 127.4, 126.0, 125.5, 125.4, 125.1, 118.6, 103.1, 60.1, 21.2, 14.2; IR (KBr): 3060, 2993, 1719, 1654, 1490, 1232, 1047, 988, 847, 770  $\text{cm}^{-1}$ ; HRMS (ESI)  $m/z$ :  $[\text{M}+\text{H}]^+$  calcd. for  $\text{C}_{23}\text{H}_{23}\text{O}_4$  363.1591, found 363.1588.

**Ethyl (E)-3-(2-((1E,4E)-3-oxo-5-(*p*-tolyl)penta-1,4-dien-1-yl)phenoxy)acrylate(1k).** The

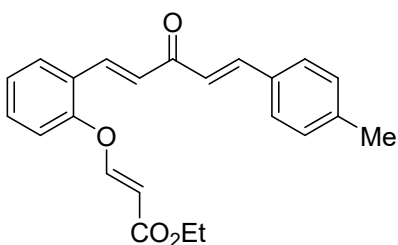

product **1k** was obtained as a pale yellow oil (1.36 g, 75% yield).  $^1\text{H}$  NMR (400 MHz,  $\text{CDCl}_3$ )  $\delta$  (ppm): 7.87 (d,  $J = 16.0$  Hz, 1H), 7.78 (d,  $J = 12.0$  Hz, 1H), 7.70 (d,  $J = 16.0$  Hz, 1H), 7.69 (dd,  $J = 8.0, 1.6$  Hz, 1H), 7.49 (d,  $J = 8.4$  Hz, 2H), 7.40 (td,  $J = 7.6, 1.2$  Hz, 1H), 7.22 (t,  $J = 7.4$  Hz, 1H), 7.20 (d,  $J = 8.0$  Hz, 2H), 7.10 (d,  $J = 16.0$  Hz, 1H), 7.07 (dd,  $J = 8.0, 0.8$  Hz, 1H), 7.00 (d,  $J = 16.0$  Hz, 1H), 5.56 (d,  $J = 12.0$  Hz, 1H), 4.19 (q,  $J = 7.2$  Hz, 2H), 2.36 (s, 3H), 1.27 (t,  $J = 7.2$  Hz, 3H);  $^{13}\text{C}$  NMR (100 MHz,  $\text{CDCl}_3$ )  $\delta$  (ppm): 188.7, 166.7, 158.6, 154.2, 143.6, 141.0, 135.9, 131.8, 131.6, 129.6, 128.4, 128.3, 127.4, 126.0, 125.4, 124.3, 118.6, 103.1, 60.1, 21.4, 14.2; IR (KBr):

3049, 2993, 1717, 1662, 1489, 1234, 1126, 1040, 989, 850, 754  $\text{cm}^{-1}$ ; HRMS (ESI)  $m/z$ :  $[M+H]^+$  calcd. for  $\text{C}_{23}\text{H}_{23}\text{O}_4$  363.1591, found 363.1589.

**Ethyl (*E*)-3-(2-((1*E*,4*E*)-5-(furan-2-yl)-3-oxopenta-1,4-dien-1-yl)phenoxy)acrylate (**1l**).** The

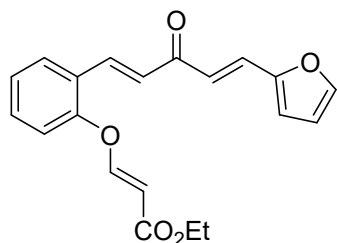

product **1l** was obtained as a pale yellow oil (1.53 g, 90% yield).

$^1\text{H}$  NMR (400 MHz,  $\text{CDCl}_3$ )  $\delta$  (ppm): 7.86 (d,  $J = 16.4$  Hz, 1H), 7.77 (d,  $J = 12.0$  Hz, 1H), 7.67 (d,  $J = 7.2$  Hz, 1H), 7.51 (s, 1H), 7.48 (d,  $J = 15.6$  Hz, 1H), 7.40 (t,  $J = 7.8$  Hz, 1H), 7.22 (t,  $J = 7.4$  Hz, 1H), 7.07 (d,  $J = 8.0$  Hz, 1H), 7.01 (d,  $J = 16.0$  Hz, 1H),

6.96 (d,  $J = 15.6$  Hz, 1H), 6.69 (d,  $J = 3.2$  Hz, 1H), 6.49 (dd,  $J = 3.2, 2.0$  Hz, 1H), 5.55 (d,  $J = 12.0$  Hz, 1H), 4.18 (q,  $J = 7.2$  Hz, 2H), 1.27 (t,  $J = 7.0$  Hz, 3H);  $^{13}\text{C}$  NMR (100 MHz,  $\text{CDCl}_3$ )  $\delta$  (ppm): 188.3, 166.7, 158.6, 154.3, 151.3, 145.0, 135.9, 131.6, 129.6, 128.4, 128.0, 126.0, 125.4, 122.3, 118.6, 116.1, 112.6, 103.1, 60.1, 14.2; IR (KBr): 3086, 2979, 1720, 1623, 1490, 1228, 1124, 1032, 981, 810, 757  $\text{cm}^{-1}$ ; HRMS (ESI)  $m/z$ :  $[M+H]^+$  calcd. for  $\text{C}_{20}\text{H}_{19}\text{O}_5$  339.1227, found 339.1226.

**Ethyl (*E*)-3-(2-((1*E*,4*E*)-3-oxo-5-(thiophen-2-yl)penta-1,4-dien-1-yl)phenoxy)acrylate (**1m**).**

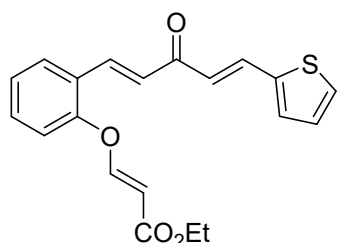

The product **1m** was obtained as a pale yellow oil (1.69 g, 95%

yield).  $^1\text{H}$  NMR (400 MHz,  $\text{CDCl}_3$ )  $\delta$  (ppm): 7.87 (d,  $J = 10.0$  Hz, 1H), 7.83 (d,  $J = 9.6$  Hz, 1H), 7.77 (d,  $J = 12.4$  Hz, 1H), 7.68 (dd,  $J = 8.0, 1.6$  Hz, 1H), 7.43-7.38 (m, 2H), 7.32 (d,  $J = 3.6$  Hz, 1H), 7.22 (t,  $J = 7.4$  Hz, 1H), 7.08-7.05 (m, 2H), 7.03 (d,  $J =$

16.0 Hz, 1H), 6.84 (d,  $J = 15.6$  Hz, 1H), 5.56 (d,  $J = 12.0$  Hz, 1H), 4.18 (q,  $J = 7.2$  Hz, 2H), 1.27 (t,  $J = 7.0$  Hz, 3H);  $^{13}\text{C}$  NMR (100 MHz,  $\text{CDCl}_3$ )  $\delta$  (ppm): 188.1, 166.7, 158.6, 154.3, 140.1, 136.01, 135.97, 131.8, 131.7, 128.9, 128.4, 128.3, 127.5, 126.0, 125.4, 124.1, 118.6, 103.1, 60.1, 14.2; IR (KBr): 3090, 2991, 1718, 1654, 1489, 1230, 1126, 1043, 983, 849, 769  $\text{cm}^{-1}$ ; HRMS (ESI)  $m/z$ :  $[M+H]^+$  calcd. for  $\text{C}_{20}\text{H}_{19}\text{O}_4\text{S}$  355.0999, found 355.0998.

**Ethyl (*E*)-3-(2-((1*E*,4*E*)-5-(naphthalen-1-yl)-3-oxopenta-1,4-dien-1-yl)phenoxy)acrylate (**1n**).**

The product **1n** was obtained as a pale yellow oil (1.54 g, 77% yield).  $^1\text{H}$  NMR (400 MHz,  $\text{CDCl}_3$ )  $\delta$  (ppm): 8.60 (d,  $J = 15.6$  Hz, 1H), 8.25 (d,  $J = 8.0$  Hz, 1H), 7.95 (d,  $J = 16.0$  Hz, 1H), 7.92 (d,  $J = 8.8$  Hz, 1H), 7.88 (t,  $J = 8.4$  Hz, 2H), 7.82 (d,  $J = 12.0$  Hz, 1H), 7.73 (dd,  $J = 7.6, 1.2$  Hz, 1H), 7.62-7.58 (m, 1H), 7.56-7.50 (m, 2H), 7.44 (td,  $J = 7.6, 1.2$  Hz, 1H), 7.26 (t,  $J = 7.6$  Hz, 1H), 7.18

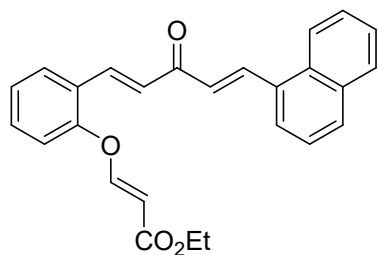

(d,  $J = 15.6$  Hz, 1H), 7.17 (d,  $J = 16.4$  Hz, 1H), 7.11 (d,  $J = 8.4$  Hz, 1H), 5.61 (d,  $J = 12.4$  Hz, 1H), 4.20 (q,  $J = 7.0$  Hz, 2H), 1.29 (t,  $J = 7.0$  Hz, 3H);  $^{13}\text{C}$  NMR (100 MHz,  $\text{CDCl}_3$ )  $\delta$  (ppm): 188.6, 166.8, 158.6, 154.3, 140.4, 136.4, 133.6, 132.0, 131.8, 131.6, 130.8, 128.7, 128.6, 127.8, 127.6, 126.9, 126.2, 125.9, 125.42, 125.40, 125.1, 123.3, 118.6, 103.2, 60.2, 14.2; IR (KBr): 3069, 2988, 1718, 1653, 1489, 1231, 1127, 1046, 981, 850, 761  $\text{cm}^{-1}$ ; HRMS (ESI)  $m/z$ :  $[\text{M}+\text{H}]^+$  calcd. for  $\text{C}_{26}\text{H}_{23}\text{O}_4$  399.1591, found 399.1586.

**Ethyl (*E*)-3-(2-((1*E*,4*E*)-5-(naphthalen-2-yl)-3-oxopenta-1,4-dien-1-yl)phenoxy)acrylate (**1o**).**

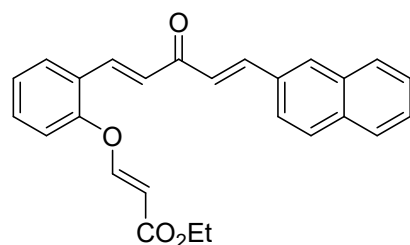

The product **1o** was obtained as a pale yellow oil (1.50 g, 75% yield).  $^1\text{H}$  NMR (400 MHz,  $\text{CDCl}_3$ )  $\delta$  (ppm): 7.97 (s, 1H), 7.92 (d,  $J = 16.0$  Hz, 1H), 7.90-7.79 (m, 5H), 7.72 (t,  $J = 8.8$  Hz, 2H), 7.53-7.48 (m, 2H), 7.41 (t,  $J = 7.6$  Hz, 1H), 7.24 (t,  $J = 7.6$  Hz, 1H), 7.15 (d,  $J = 16.0$  Hz, 1H), 7.14 (d,  $J = 16.0$  Hz, 1H), 7.08 (dd,  $J = 8.0, 0.8$  Hz, 1H), 5.60 (d,  $J = 12.4$  Hz, 1H), 4.20 (q,  $J = 7.2$  Hz, 2H), 1.29 (t,  $J = 7.2$  Hz, 3H);  $^{13}\text{C}$  NMR (100 MHz,  $\text{CDCl}_3$ )  $\delta$  (ppm): 188.6, 166.7, 158.6, 154.3, 143.6, 136.2, 134.3, 133.2, 132.1, 131.7, 130.6, 128.6, 128.5, 128.4, 127.7, 127.5, 127.3, 126.7, 126.0, 125.40, 125.37, 123.5, 118.6, 103.2, 60.1, 14.2; IR (KBr): 3070, 2985, 1713, 1652, 1489, 1231, 1129, 1036, 986, 820, 760  $\text{cm}^{-1}$ ; HRMS (ESI)  $m/z$ :  $[\text{M}+\text{H}]^+$  calcd. for  $\text{C}_{26}\text{H}_{23}\text{O}_4$  399.1591, found 399.1592.

**Ethyl (*E*)-3-(4-methyl-2-((1*E*,4*E*)-3-oxo-5-phenylpenta-1,4-dien-1-yl)phenoxy)acrylate (**1p**).**

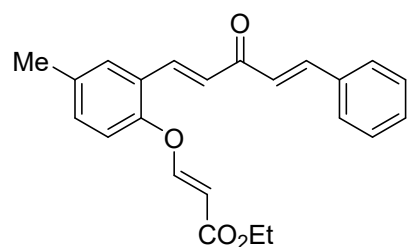

The product **1p** was obtained as a pale yellow oil (1.13 g, 61% yield).  $^1\text{H}$  NMR (400 MHz,  $\text{CDCl}_3$ )  $\delta$  (ppm): 7.83 (d,  $J = 16.0$  Hz, 1H), 7.74 (d,  $J = 12.0$  Hz, 1H), 7.70 (d,  $J = 16.0$  Hz, 1H), 7.58-7.56 (m, 2H), 7.47 (d,  $J = 1.2$  Hz, 1H), 7.39-7.35 (m, 3H), 7.18 (dd,  $J = 8.4, 1.6$  Hz, 1H), 7.07 (d,  $J = 16.0$  Hz, 1H), 7.03 (d,  $J = 16.0$  Hz, 1H), 6.93 (d,  $J = 8.4$  Hz, 1H), 5.50 (d,  $J = 12.4$  Hz, 1H), 4.16 (q,  $J = 7.2$  Hz, 2H), 2.34 (s, 3H), 1.25 (t,  $J = 7.2$  Hz, 3H);  $^{13}\text{C}$  NMR (100 MHz,  $\text{CDCl}_3$ )  $\delta$  (ppm): 188.6, 166.7, 159.1, 152.2, 143.3, 136.2, 135.0, 134.5, 132.3, 130.4, 128.8, 128.6, 128.2,



127.0, 125.5, 125.2, 118.6, 102.5, 60.0, 20.6, 14.1; IR (KBr): 3048, 2993, 1719, 1652, 1496, 1234, 1130, 1046, 988, 836, 762  $\text{cm}^{-1}$ ; HRMS (ESI)  $m/z$ :  $[M+H]^+$  calcd. for  $\text{C}_{23}\text{H}_{23}\text{O}_4$  363.1591, found 363.1591.

**Ethyl (*E*)-3-(2-((1*E*,4*E*)-5-(4-chlorophenyl)-3-oxopenta-1,4-dien-1-yl)-4-methylphenoxy)acrylate (**1q**).**

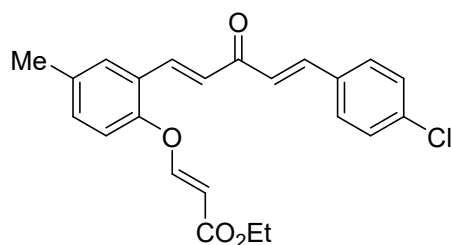

The product **1q** was obtained as a pale yellow oil (1.79 g, 90% yield).  $^1\text{H}$  NMR (400 MHz,  $\text{CDCl}_3$ )  $\delta$  (ppm): 7.81 (d,  $J = 16.0$  Hz, 1H), 7.73 (d,  $J = 12.4$  Hz, 1H), 7.61 (d,  $J = 16.0$  Hz, 1H), 7.47 (d,  $J = 8.4$  Hz, 2H), 7.44 (s, 1H), 7.31 (d,  $J = 8.4$  Hz, 2H),

7.17 (d,  $J = 8.4$  Hz, 1H), 7.04 (d,  $J = 16.4$  Hz, 1H), 6.98 (d,  $J = 16.0$  Hz, 1H), 6.92 (d,  $J = 8.0$  Hz, 1H), 5.50 (d,  $J = 12.4$  Hz, 1H), 4.16 (q,  $J = 7.0$  Hz, 2H), 2.33 (s, 3H), 1.25 (t,  $J = 7.0$  Hz, 3H);  $^{13}\text{C}$  NMR (100 MHz,  $\text{CDCl}_3$ )  $\delta$  (ppm): 188.1, 166.6, 158.8, 152.1, 141.6, 136.3, 136.0, 134.9, 132.9, 132.3, 129.3, 128.9, 128.5, 126.7, 125.4, 125.2, 118.3, 102.4, 59.9, 20.5, 14.1; IR (KBr): 3057, 2993, 1713, 1657, 1496, 1233, 1139, 1099, 982, 820, 708  $\text{cm}^{-1}$ ; HRMS (ESI)  $m/z$ :  $[M+H]^+$  calcd. for  $\text{C}_{23}\text{H}_{22}\text{ClO}_4$  397.1201, found 397.1200.

**Ethyl (*E*)-3-(4-methyl-2-((1*E*,4*E*)-3-oxo-5-(*p*-tolyl)penta-1,4-dien-1-yl)phenoxy)acrylate (**1r**).**

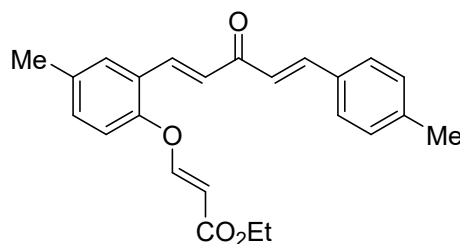

The product **1r** was obtained as a pale yellow oil (1.74 g, 92% yield).  $^1\text{H}$  NMR (400 MHz,  $\text{CDCl}_3$ )  $\delta$  (ppm): 7.73 (d,  $J = 16.0$  Hz, 1H), 7.65 (d,  $J = 12.4$  Hz, 1H), 7.58 (d,  $J = 16.0$  Hz, 1H), 7.37 (s, 1H), 7.36 (d,  $J = 8.0$  Hz, 2H), 7.06 (d,  $J = 8.0$  Hz, 3H), 6.99 (d,  $J =$

16.0 Hz, 1H), 6.88 (d,  $J = 16.0$  Hz, 1H), 6.81 (d,  $J = 8.4$  Hz, 1H), 5.43 (d,  $J = 12.0$  Hz, 1H), 4.09 (q,  $J = 7.2$  Hz, 2H), 2.24 (s, 6H), 1.18 (t,  $J = 7.0$  Hz, 3H);  $^{13}\text{C}$  NMR (100 MHz,  $\text{CDCl}_3$ )  $\delta$  (ppm): 188.1, 166.3, 158.7, 151.9, 143.0, 140.5, 135.5, 134.6, 131.9, 131.5, 129.2, 128.2, 128.0, 126.6, 125.1, 124.1, 118.1, 102.2, 59.6, 21.0, 20.3, 13.9; IR (KBr): 3058, 2993, 1709, 1634, 1496, 1217, 1057, 986, 804  $\text{cm}^{-1}$ ; HRMS (ESI)  $m/z$ :  $[M+H]^+$  calcd. for  $\text{C}_{24}\text{H}_{25}\text{ClO}_4$  377.1747, found 377.1745.

**Ethyl (*E*)-3-(4-chloro-2-((1*E*,4*E*)-3-oxo-5-phenylpenta-1,4-dien-1-yl)phenoxy)acrylate (**1s**).**

The product **1s** was obtained as a pale yellow oil (1.40 g, 73% yield).  $^1\text{H}$  NMR (400 MHz,  $\text{CDCl}_3$ )  $\delta$  (ppm): 7.77 (d,  $J = 16.0$  Hz, 1H), 7.71 (d,  $J = 16.4$  Hz, 1H), 7.70 (d,  $J = 12.0$  Hz, 1H), 7.64 (d,  $J =$

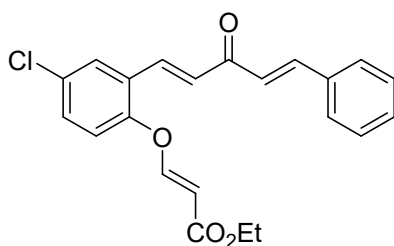

= 2.4 Hz, 1H), 7.59-7.56 (m, 2H), 7.39-7.37 (m, 3H), 7.33 (dd,  $J = 8.6, 2.6$  Hz, 1H), 7.08 (d,  $J = 16.0$  Hz, 1H), 7.00 (d,  $J = 16.4$  Hz, 1H), 6.99 (d,  $J = 8.0$  Hz, 1H), 5.55 (d,  $J = 12.0$  Hz, 1H), 4.17 (q,  $J = 7.2$  Hz, 2H), 1.26 (t,  $J = 7.2$  Hz, 3H);  $^{13}\text{C}$  NMR (100 MHz,  $\text{CDCl}_3$ )  $\delta$  (ppm): 188.1, 166.4, 158.0,

152.6, 143.8, 134.5, 134.4, 131.2, 130.7, 130.6, 128.8, 128.3, 127.9, 127.8, 127.5, 125.2, 119.8, 103.6, 60.2, 14.1; IR (KBr): 3079, 2992, 1717, 1657, 1488, 1245, 1138, 984, 812, 757  $\text{cm}^{-1}$ ; HRMS (ESI)  $m/z$ :  $[\text{M}+\text{H}]^+$  calcd. for  $\text{C}_{22}\text{H}_{20}\text{ClO}_4$  383.1045, found 383.1041.

**Ethyl (*E*)-3-(4-chloro-2-((1*E*,4*E*)-5-(4-chlorophenyl)-3-oxopenta-1,4-dien-1-yl)phenoxy)acrylate (**1t**).**

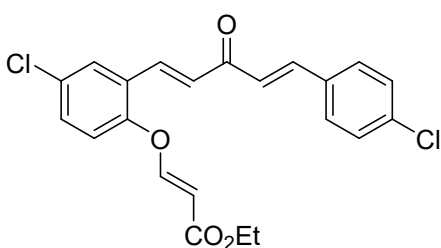

The product **1t** was obtained as a pale yellow oil (1.08 g, 52% yield).  $^1\text{H}$  NMR (400 MHz,  $\text{CDCl}_3$ )  $\delta$  (ppm): 7.77 (d,  $J = 16.4$  Hz, 1H), 7.70 (d,  $J = 12.4$  Hz, 1H), 7.64 (d,  $J = 16.0$  Hz, 1H), 7.63 (d,  $J = 2.8$  Hz, 1H), 7.50 (d,  $J = 8.4$  Hz, 2H), 7.36-7.33 (m,

3H), 7.05 (d,  $J = 16.0$  Hz, 1H), 7.00 (d,  $J = 8.8$  Hz, 1H), 6.97 (d,  $J = 16.0$  Hz, 1H), 5.55 (d,  $J = 12.4$  Hz, 1H), 4.17 (q,  $J = 7.0$  Hz, 2H), 1.26 (t,  $J = 7.0$  Hz, 3H);  $^{13}\text{C}$  NMR (100 MHz,  $\text{CDCl}_3$ )  $\delta$  (ppm): 187.9, 166.4, 158.0, 152.6, 142.3, 136.5, 134.8, 132.9, 131.3, 130.7, 129.5, 129.1, 127.93, 127.85, 127.4, 125.6, 119.9, 103.7, 60.3, 14.2; IR (KBr): 3098, 2993, 1716, 1658, 1488, 1235, 1136, 981, 819, 739  $\text{cm}^{-1}$ ; HRMS (ESI)  $m/z$ :  $[\text{M}+\text{H}]^+$  calcd. for  $\text{C}_{22}\text{H}_{19}\text{Cl}_2\text{O}_4$  417.0655, found 417.0651.

**Ethyl (*E*)-3-(4-chloro-2-((1*E*,4*E*)-3-oxo-5-(*p*-tolyl)penta-1,4-dien-1-yl)phenoxy)acrylate (**1u**).**

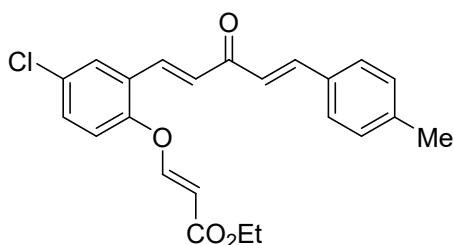

The product **1u** was obtained as a pale yellow oil (1.25 g, 63% yield).  $^1\text{H}$  NMR (400 MHz,  $\text{CDCl}_3$ )  $\delta$  (ppm): 7.76 (d,  $J = 16.0$  Hz, 1H), 7.71 (d,  $J = 12.0$  Hz, 1H), 7.69 (d,  $J = 16.0$  Hz, 1H), 7.64 (d,  $J = 2.0$  Hz, 1H), 7.48 (d,  $J = 7.6$  Hz, 2H), 7.33 (dd,  $J = 8.6, 1.8$  Hz,

1H), 7.19 (d,  $J = 7.6$  Hz, 2H), 7.08 (d,  $J = 16.0$  Hz, 1H), 7.00 (d,  $J = 8.8$  Hz, 1H), 6.96 (d,  $J = 16.0$  Hz, 1H), 5.55 (d,  $J = 12.4$  Hz, 1H), 4.18 (q,  $J = 7.2$  Hz, 2H), 2.36 (s, 3H), 1.27 (t,  $J = 7.0$  Hz, 3H);  $^{13}\text{C}$  NMR (100 MHz,  $\text{CDCl}_3$ )  $\delta$  (ppm): 188.2, 166.4, 158.1, 152.6, 144.0, 141.2, 134.3, 131.7,

131.1, 130.7, 129.6, 128.4, 128.1, 127.8, 127.6, 124.4, 119.8, 103.6, 60.2, 21.4, 14.2; IR (KBr): 3063, 2991, 1710, 1638, 1482, 1233, 1157, 980, 803, 732  $\text{cm}^{-1}$ ; HRMS (ESI)  $m/z$ :  $[M+H]^+$  calcd. for  $\text{C}_{23}\text{H}_{22}\text{ClO}_4$  397.1201, found 397.1200.

**Ethyl (*E*)-3-(2-chloro-6-((1*E*,4*E*)-3-oxo-5-phenylpenta-1,4-dien-1-yl)phenoxy)acrylate (**1v**).**

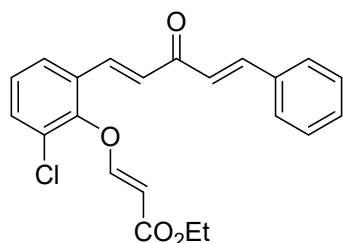

The product **1v** was obtained as a pale yellow oil (1.38 g, 72% yield).  $^1\text{H}$  NMR (400 MHz,  $\text{CDCl}_3$ )  $\delta$  (ppm): 7.71 (d,  $J = 12.4$  Hz, 1H), 7.70 (d,  $J = 16.0$  Hz, 1H), 7.69 (d,  $J = 16.0$  Hz, 1H), 7.61 (dd,  $J = 7.8, 1.4$  Hz, 1H), 7.58-7.56 (m, 2H), 7.46 (dd,  $J = 8.0, 1.2$  Hz, 1H), 7.39-7.37 (m, 3H), 7.22 (t,  $J = 8.0$  Hz, 1H), 7.09 (d,  $J = 16.0$  Hz, 1H), 7.00 (d,  $J = 16.0$  Hz, 1H), 5.13 (d,  $J = 12.4$  Hz, 1H), 4.13 (q,  $J = 7.2$  Hz, 2H), 1.23 (t,  $J = 7.0$  Hz, 3H);  $^{13}\text{C}$  NMR (100 MHz,  $\text{CDCl}_3$ )  $\delta$  (ppm): 188.2, 166.3, 159.6, 148.9, 143.9, 135.0, 134.3, 132.1, 130.6, 129.7, 128.8, 128.4, 128.3, 127.7, 127.0, 126.4, 125.1, 101.2, 60.1, 14.1; IR (KBr): 3082, 2995, 1719, 1635, 1451, 1226, 1046, 986, 845, 784  $\text{cm}^{-1}$ ; HRMS (ESI)  $m/z$ :  $[M+H]^+$  calcd. for  $\text{C}_{22}\text{H}_{20}\text{ClO}_4$  383.1045, found 383.1041.

**Ethyl (*E*)-3-(2-methyl-6-((1*E*,4*E*)-3-oxo-5-phenylpenta-1,4-dien-1-yl)phenoxy)acrylate (**1w**).**

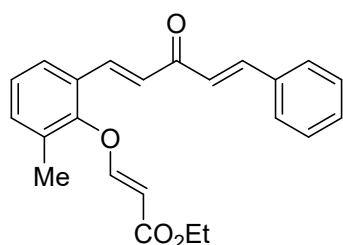

The product **1w** was obtained as a pale yellow oil (1.47 g, 81% yield).  $^1\text{H}$  NMR (400 MHz,  $\text{CDCl}_3$ )  $\delta$  (ppm): 7.71 (d,  $J = 12.4$  Hz, 1H), 7.68 (d,  $J = 16.0$  Hz, 1H), 7.62 (d,  $J = 16.0$  Hz, 1H), 7.49-7.47 (m, 3H), 7.29-7.27 (m, 3H), 7.16 (d,  $J = 7.2$  Hz, 1H), 7.09 (t,  $J = 7.6$  Hz, 1H), 7.00 (d,  $J = 16.0$  Hz, 1H), 6.93 (d,  $J = 16.0$  Hz, 1H), 4.96 (d,  $J = 12.4$  Hz, 1H), 4.04 (q,  $J = 7.0$  Hz, 2H), 2.10 (s, 3H), 1.13 (t,  $J = 7.0$  Hz, 3H);  $^{13}\text{C}$  NMR (100 MHz,  $\text{CDCl}_3$ )  $\delta$  (ppm): 188.1, 166.4, 160.2, 151.0, 143.1, 135.8, 134.2, 133.2, 130.6, 130.1, 128.5, 123.0, 127.04, 126.99, 126.0, 125.3, 125.0, 99.9, 59.7, 15.6, 13.8; IR (KBr): 3080, 2992, 1721, 1651, 1459, 1252, 1186, 1041, 989, 841, 780  $\text{cm}^{-1}$ ; HRMS (ESI)  $m/z$ :  $[M+H]^+$  calcd. for  $\text{C}_{23}\text{H}_{23}\text{O}_4$  363.1591, found 363.1586.

**Methyl (*E*)-3-(2-((1*E*,4*E*)-3-oxo-5-phenylpenta-1,4-dien-1-yl)phenoxy)acrylate (**1x**).** The product **1x** was obtained as a pale yellow oil (1.02 g, 61% yield).  $^1\text{H}$  NMR (400 MHz,  $\text{CDCl}_3$ )  $\delta$  (ppm): 7.84 (d,  $J = 16.0$  Hz, 1H), 7.73 (d,  $J = 12.0$  Hz, 1H), 7.67 (d,  $J = 15.6$  Hz, 1H), 7.64 (d,  $J = 7.6$  Hz, 1H), 7.54-7.52 (m, 2H), 7.35-7.32 (m, 4H), 7.17 (t,  $J = 7.4$  Hz, 1H), 7.06 (d,  $J = 16.0$  Hz,

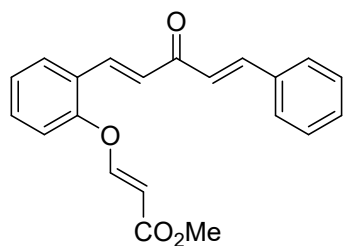

1H), 7.00 (d,  $J = 16.0$  Hz, 2H), 6.99 (d,  $J = 8.8$  Hz, 2H), 5.54 (d,  $J = 12.4$  Hz, 1H), 3.67 (s, 3H);  $^{13}\text{C}$  NMR (100 MHz,  $\text{CDCl}_3$ )  $\delta$  (ppm): 188.3, 166.8, 158.4, 154.1, 143.2, 135.8, 134.4, 131.5, 130.3, 128.7, 128.2, 128.1, 127.1, 125.6, 125.2, 125.1, 118.2, 102.6, 51.1; IR (KBr): 3080, 2962, 1723, 1655, 1452, 1231, 1049, 988, 848, 763  $\text{cm}^{-1}$ ; HRMS (ESI)  $m/z$ :  $[\text{M}+\text{H}]^+$  calcd. for  $\text{C}_{21}\text{H}_{19}\text{O}_4$  335.1278, found 335.1281.

**Isopropyl (*E*)-3-(2-((1*E*,4*E*)-3-oxo-5-phenylpenta-1,4-dien-1-yl)phenoxy)acrylate (1y).** The

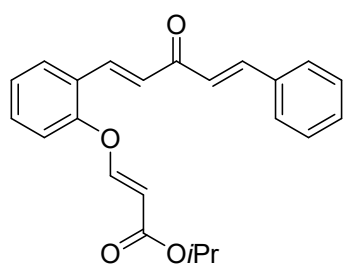

product **1y** was obtained as a pale yellow oil (1.63 g, 90% yield).  $^1\text{H}$  NMR (400 MHz,  $\text{CDCl}_3$ )  $\delta$  (ppm): 7.82 (d,  $J = 16.0$  Hz, 1H), 7.68 (d,  $J = 12.4$  Hz, 1H), 7.64 (d,  $J = 16.4$  Hz, 1H), 7.61 (d,  $J = 8.8$  Hz, 1H), 7.50-7.48 (m, 2H), 7.32-7.26 (m, 4H), 7.13 (t,  $J = 7.4$  Hz, 1H), 7.04 (d,  $J = 16.0$  Hz, 1H), 6.97 (d,  $J = 14.0$  Hz, 1H), 6.96 (d,  $J = 8.8$  Hz, 1H), 5.48 (d,  $J = 12.4$  Hz, 1H), 5.04-4.98 (m, 1H), 1.19 (d,  $J = 6.4$  Hz, 6H);  $^{13}\text{C}$  NMR (100 MHz,  $\text{CDCl}_3$ )  $\delta$  (ppm): 188.2, 165.9, 158.1, 154.0, 143.1, 135.7, 134.3, 131.4, 130.2, 128.6, 128.1, 128.09, 128.04, 127.0, 125.6, 125.0, 118.2, 103.2, 67.1, 21.6; IR (KBr): 3077, 2993, 1716, 1653, 1459, 1232, 1104, 992, 847, 762  $\text{cm}^{-1}$ ; HRMS (ESI)  $m/z$ :  $[\text{M}+\text{H}]^+$  calcd. for  $\text{C}_{23}\text{H}_{23}\text{O}_4$  363.1591, found 363.1593.

***Tert*-butyl (*E*)-3-(2-((1*E*,4*E*)-3-oxo-5-phenylpenta-1,4-dien-1-yl)phenoxy)acrylate (1z).** The

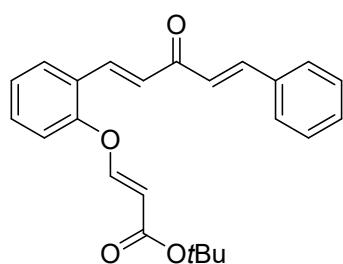

product **1z** was obtained as a pale yellow oil (1.58 g, 84% yield).  $^1\text{H}$  NMR (400 MHz,  $\text{CDCl}_3$ )  $\delta$  (ppm): 7.87 (d,  $J = 16.4$  Hz, 1H), 7.70 (d,  $J = 15.6$  Hz, 3H), 7.67 (d,  $J = 10.8$  Hz, 2H), 7.40-7.37 (m, 4H), 7.20 (t,  $J = 7.4$  Hz, 1H), 7.09 (d,  $J = 16.0$  Hz, 1H), 7.06-7.02 (m, 2H), 5.49 (d,  $J = 12.4$  Hz, 1H), 1.47 (s, 9H);  $^{13}\text{C}$  NMR (100 MHz,  $\text{CDCl}_3$ )  $\delta$  (ppm): 188.6, 165.9, 157.8, 154.3, 143.4, 136.2, 134.5, 131.6, 130.4, 128.8, 128.4, 128.3, 127.3, 125.8, 125.2, 125.1, 118.5, 104.7, 80.3, 28.1; IR (KBr): 3080, 2988, 1715, 1653, 1458, 1230, 1121, 989, 849, 762  $\text{cm}^{-1}$ ; HRMS (ESI)  $m/z$ :  $[\text{M}+\text{Na}]^+$  calcd. for  $\text{C}_{24}\text{H}_{24}\text{NaO}_4$  399.1567, found 399.1570.

**Benzyl (*E*)-3-(2-((1*E*,4*E*)-3-oxo-5-phenylpenta-1,4-dien-1-yl)phenoxy)acrylate (1aa).** The product **1aa** was obtained as a pale yellow oil (1.83 g, 89% yield).  $^1\text{H}$  NMR (400 MHz,  $\text{CDCl}_3$ )  $\delta$

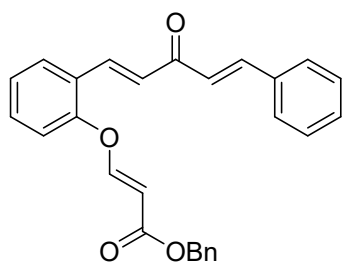

(ppm): 7.90 (d,  $J = 16.0$  Hz, 1H), 7.80 (d,  $J = 12.4$  Hz, 1H), 7.72 (d,  $J = 16.0$  Hz, 1H), 7.66 (d,  $J = 7.6$  Hz, 1H), 7.56-7.55 (m, 2H), 7.36-7.26 (m, 9H), 7.19 (t,  $J = 7.4$  Hz, 1H), 7.11 (d,  $J = 16.0$  Hz, 1H), 7.04 (d,  $J = 16.0$  Hz, 1H), 6.99 (d,  $J = 8.0$  Hz, 1H), 5.63 (d,  $J = 12.4$  Hz, 1H), 5.18 (s, 2H);  $^{13}\text{C}$  NMR (100 MHz,  $\text{CDCl}_3$ )  $\delta$  (ppm): 188.1, 166.1, 158.7, 153.9, 143.1, 135.64, 135.63, 134.2, 131.4, 130.2, 128.6, 128.2, 128.08, 128.05, 127.8, 127.0, 125.5, 125.1, 125.0, 118.1, 102.5, 77.2, 65.6; IR (KBr): 3047, 2960, 1721, 1653, 1456, 1229, 1122, 988, 846, 759  $\text{cm}^{-1}$ ; HRMS (ESI)  $m/z$ :  $[\text{M}+\text{H}]^+$  calcd. for  $\text{C}_{27}\text{H}_{23}\text{O}_4$  411.1591, found 411.1596.

### 3. General Procedure for the triple Michael/aldol Cascade Reaction

Enolate substituted dienone **1** (0.1 mmol), nitromethane **2** (54  $\mu\text{L}$ , 1.0 mmol) and TMG (12.5  $\mu\text{L}$ , 0.1 mmol) were stirred in redistilled acetonitrile (1 mL) at rt. Once the TLC analysis showed complete consumption of **1**, the reaction mixture was concentrated in *vacuo* to give the crude residue. The resulting residue was subsequently purified by flash chromatography on silica gel ( $\text{CH}_2\text{Cl}_2/\text{Petroleum ether} = 3:2$ , v/v) to afford the desired tetracyclic chromane **3**.

#### Ethyl 3-hydroxy-9a-nitro-1-phenyl-2,3,4,4a,9,9a-hexahydro-1H-3,9-methanoxanthene-4-carboxylate (a 9:1 mixture of diastereomers) (**3a**)

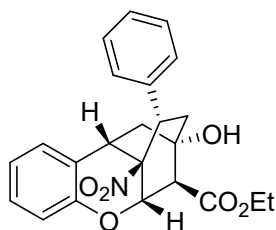

The product **3a** was obtained as a white solid (31.1 mg, 76% yield).  $^1\text{H}$  NMR (400 MHz,  $\text{CDCl}_3$ )  $\delta$  (ppm): 7.40-7.32 (m, 3H), 7.29-7.26 (m, 2H), 7.12 (t,  $J = 7.8$  Hz, 1H), 7.07 (d,  $J = 7.6$  Hz, 1H), 6.93 (t,  $J = 7.4$  Hz, 1H), 6.83 (d,  $J = 8.0$  Hz, 1H), 5.64 (t,  $J = 3.4$  Hz, 1H), 4.36 (q,  $J = 7.2$  Hz, 2H), 3.84 (d,  $J = 11.6$  Hz, 1H), 3.79 (dd,  $J = 12.2, 5.4$  Hz, 1H), 3.28 (br s, 1H), 2.99 (t,  $J = 2.8$  Hz, 1H), 2.80 (t,  $J = 12.4$  Hz, 1H), 2.59 (td,  $J = 13.0, 3.4$  Hz, 1H), 2.05-1.96 (m, 2H), 1.38 (t,  $J = 7.2$  Hz, 3H);  $^{13}\text{C}$  NMR (100 MHz,  $\text{CDCl}_3$ )  $\delta$  (ppm): 171.7, 148.2, 137.0, 129.1, 128.52, 128.47, 128.3, 128.1, 126.4, 122.5, 117.6, 87.0, 75.5, 67.9, 62.3, 55.2, 45.4, 45.3, 37.3, 31.3, 14.2; IR (KBr): 3095, 2983, 1708, 1553, 1462, 1351, 1214, 1034, 839, 761  $\text{cm}^{-1}$ ; HRMS (ESI)  $m/z$ :  $[\text{M}+\text{Na}]^+$  calcd. for  $\text{C}_{23}\text{H}_{23}\text{NNaO}_6$  432.1418, found 432.1421.

#### Ethyl 1-(4-fluorophenyl)-3-hydroxy-9a-nitro-2,3,4,4a,9,9a-hexahydro-1H-3,9-methanoxan-

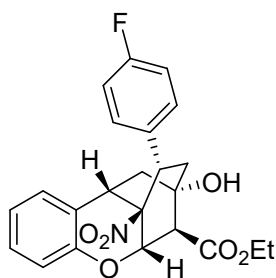

**thene-4-carboxylate (a 9:1 mixture of diastereomers) (3b).** The product **3b** was obtained as a white solid (32.5 mg, 76% yield). <sup>1</sup>H NMR (400 MHz, CDCl<sub>3</sub>)  $\delta$  (ppm): 7.24 (dd,  $J = 7.8, 5.4$  Hz, 2H), 7.13 (t,  $J = 7.8$  Hz, 1H), 7.08-7.04 (m, 3H), 6.94 (t,  $J = 7.4$  Hz, 1H), 6.82 (d,  $J = 8.0$  Hz, 1H), 5.62 (t,  $J = 3.0$  Hz, 1H), 4.35 (q,  $J = 7.2$  Hz, 2H), 3.81-3.76 (m, 2H), 3.24 (br s, 1H), 2.98 (t,  $J = 2.2$  Hz, 1H), 2.75 (t,  $J = 12.4$  Hz, 1H), 2.60 (td,  $J = 13.0, 3.4$  Hz, 1H), 1.98-1.94 (m, 2H), 1.38 (t,  $J = 7.2$  Hz, 3H); <sup>13</sup>C NMR (100 MHz, CDCl<sub>3</sub>)  $\delta$  (ppm): 171.7, 162.5 (<sup>1</sup> $J_{C-F} = 246.7$  Hz), 148.1, 132.7 (<sup>4</sup> $J_{C-F} = 3.3$  Hz), 129.8 (<sup>3</sup> $J_{C-F} = 8.1$  Hz), 128.6, 128.5, 126.3, 122.6, 117.7, 116.1 (<sup>2</sup> $J_{C-F} = 21.5$  Hz), 87.0, 75.4, 67.9, 62.3, 55.2, 45.3, 44.8, 37.6, 31.3, 14.2; <sup>19</sup>F NMR (376 MHz, CDCl<sub>3</sub>)  $\delta$  (ppm): -113.6; IR (KBr): 3476, 2982, 1731, 1555, 1464, 1347, 1234, 1033, 841, 757 cm<sup>-1</sup>; HRMS (ESI)  $m/z$ : [M+H]<sup>+</sup> calcd. for C<sub>23</sub>H<sub>23</sub>FNO<sub>6</sub> 428.1504, found 428.1504.

**Ethyl 1-(2-chlorophenyl)-3-hydroxy-9a-nitro-2,3,4,4a,9,9a-hexahydro-1H-3,9-methanoxan-**

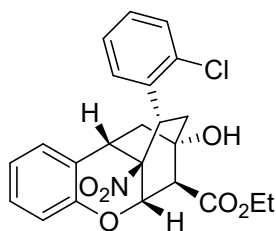

**thene-4-carboxylate (a 8:1 mixture of diastereomers) (3c).** The product **3c** was obtained as a white solid (30.6 mg, 69% yield). <sup>1</sup>H NMR (400 MHz, CDCl<sub>3</sub>)  $\delta$  (ppm): 7.57 (d,  $J = 7.6$  Hz, 1H), 7.38-7.33 (m, 2H), 7.22 (t,  $J = 7.6$  Hz, 1H), 7.13 (t,  $J = 7.8$  Hz, 1H), 7.10 (d,  $J = 8.4$  Hz, 1H), 6.93 (t,  $J = 7.6$  Hz, 1H), 6.83 (d,  $J = 8.0$  Hz, 1H), 5.68 (t,  $J = 3.4$  Hz, 1H), 4.59 (dd,  $J = 12.2, 6.2$  Hz, 1H), 4.36 (q,  $J = 7.2$  Hz, 2H), 4.14 (d,  $J = 11.6$  Hz, 1H), 3.35 (br s, 1H), 3.00 (dd,  $J = 3.2, 2.4$  Hz, 1H), 2.77 (t,  $J = 12.6$  Hz, 1H), 2.65 (td,  $J = 12.8, 3.6$  Hz, 1H), 2.00 (d,  $J = 13.2$  Hz, 1H), 1.79 (dd,  $J = 13.0, 5.0$  Hz, 1H), 1.39 (t,  $J = 7.2$  Hz, 3H); <sup>13</sup>C NMR (100 MHz, CDCl<sub>3</sub>)  $\delta$  (ppm): 171.6, 148.2, 135.7, 134.8, 130.4, 129.1, 128.9, 128.53, 128.49, 127.6, 125.8, 122.4, 117.6, 85.1, 75.3, 67.7, 62.3, 55.5, 45.5, 40.1, 39.0, 32.4, 14.1; IR (KBr): 3456, 2937, 1730, 1556, 1484, 1348, 1202, 1037, 821, 761 cm<sup>-1</sup>; HRMS (ESI)  $m/z$ : [M+H]<sup>+</sup> calcd. for C<sub>23</sub>H<sub>23</sub>ClNO<sub>6</sub> 444.1208, found 444.1207.

**Ethyl 1-(3-chlorophenyl)-3-hydroxy-9a-nitro-2,3,4,4a,9,9a-hexahydro-1H-3,9-methanoxan-**

**thene-4-carboxylate (a 12:1 mixture of diastereomers) (3d).** The product **3d** was obtained as a white solid (32.4 mg, 73% yield). <sup>1</sup>H NMR (400 MHz, CDCl<sub>3</sub>)  $\delta$  (ppm): 7.29 (d,  $J = 6.0$  Hz, 3H), 7.15-7.09 (m, 3H), 6.95 (t,  $J = 7.4$  Hz, 1H), 6.82 (d,  $J = 8.0$  Hz, 1H), 5.60 (t,  $J = 3.2$  Hz, 1H), 4.35

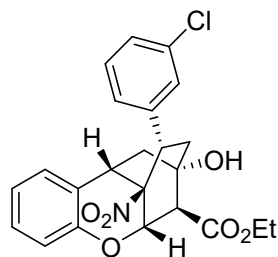

(q,  $J = 7.2$  Hz, 2H), 3.83 (d,  $J = 11.6$  Hz, 1H), 3.76 (dd,  $J = 12.0, 5.2$  Hz, 1H), 3.23 (br s, 1H), 2.98 (t,  $J = 2.4$  Hz, 1H), 2.77 (t,  $J = 12.4$  Hz, 1H), 2.60 (td,  $J = 13.0, 3.4$  Hz, 1H), 2.00-1.93 (m, 2H), 1.38 (t,  $J = 7.2$  Hz, 3H);  $^{13}\text{C}$  NMR (100 MHz,  $\text{CDCl}_3$ )  $\delta$  (ppm): 171.6, 148.1, 139.1, 134.9, 130.4, 128.60, 128.58, 128.5, 128.2, 126.7, 126.2, 122.7, 117.7, 86.8, 75.4, 67.8, 62.3, 55.1, 45.3, 45.1, 37.3, 31.3, 14.2; IR (KBr): 3434, 2985, 1732, 1551, 1468, 1337, 1194, 1034, 852, 756  $\text{cm}^{-1}$ ; HRMS (ESI)  $m/z$ :  $[\text{M}+\text{H}]^+$  calcd. for  $\text{C}_{23}\text{H}_{23}\text{ClNO}_6$  444.1208, found 444.1207.

**Ethyl 1-(4-chlorophenyl)-3-hydroxy-9a-nitro-2,3,4,4a,9,9a-hexahydro-1H-3,9-methanoxan-**

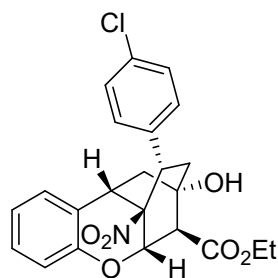

**thene-4-carboxylate (a 11:1 mixture of diastereomers) (3e).** The

product **3e** was obtained as a white solid (31.0 mg, 70% yield).  $^1\text{H}$  NMR (400 MHz,  $\text{CDCl}_3$ )  $\delta$  (ppm): 7.34 (d,  $J = 8.0$  Hz, 2H), 7.20 (d,  $J = 8.4$  Hz, 2H), 7.13 (t,  $J = 7.8$  Hz, 1H), 7.07 (d,  $J = 7.2$  Hz, 1H), 6.94 (t,  $J = 7.4$  Hz, 1H), 6.82 (d,  $J = 8.4$  Hz, 1H), 5.61 (t,  $J = 3.2$  Hz, 1H), 4.35 (q,  $J = 7.2$  Hz, 2H), 3.79 (d,  $J = 12.0$  Hz, 1H), 3.76 (dd,  $J = 12.0, 5.2$  Hz, 1H), 3.26 (br s, 1H), 2.98 (t,  $J = 2.6$  Hz, 1H), 2.75 (t,  $J = 12.4$  Hz, 1H), 2.60 (td,  $J = 13.2, 3.6$  Hz, 1H), 1.99-1.93 (m, 2H), 1.38 (t,  $J = 7.2$  Hz, 3H);  $^{13}\text{C}$  NMR (100 MHz,  $\text{CDCl}_3$ )  $\delta$  (ppm): 171.7, 148.1, 135.5, 134.4, 129.5, 129.3, 128.6, 128.5, 126.2, 122.7, 117.7, 86.9, 75.4, 67.8, 62.4, 55.2, 45.3, 44.9, 37.4, 31.3, 14.2; IR (KBr): 3466, 2984, 1731, 1554, 1495, 1346, 1201, 1030, 835, 759  $\text{cm}^{-1}$ ; HRMS (ESI)  $m/z$ :  $[\text{M}+\text{H}]^+$  calcd. for  $\text{C}_{23}\text{H}_{23}\text{ClNO}_6$  444.1208, found 444.1208.

**Ethyl 1-(2-bromophenyl)-3-hydroxy-9a-nitro-2,3,4,4a,9,9a-hexahydro-1H-3,9-methanoxan-**

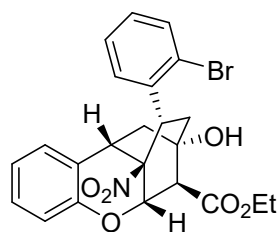

**thene-4-carboxylate (a 11:1 mixture of diastereomers) (3f).** The

product **3f** was obtained as a white solid (34.7 mg, 71% yield).  $^1\text{H}$  NMR (400 MHz,  $\text{CDCl}_3$ )  $\delta$  (ppm): 7.57-7.55 (m, 2H), 7.42 (t,  $J = 7.6$  Hz, 1H), 7.16-7.10 (m, 3H), 6.94 (t,  $J = 7.4$  Hz, 1H), 6.84 (d,  $J = 8.0$  Hz, 1H), 5.68 (s, 1H), 4.57 (dd,  $J = 11.6, 6.4$  Hz, 1H), 4.38 (q,  $J = 7.0$  Hz, 2H), 4.19 (d,  $J = 11.2$  Hz, 1H), 3.29 (br s, 1H), 3.00 (s, 1H), 2.77 (t,  $J = 12.4$  Hz, 1H), 2.65 (td,  $J = 12.8, 2.4$  Hz, 1H), 2.01 (d,  $J = 12.8$  Hz, 1H), 1.76 (dd,  $J = 12.8, 6.0$  Hz, 1H), 1.40 (t,  $J = 7.0$  Hz, 3H);  $^{13}\text{C}$  NMR (100 MHz,  $\text{CDCl}_3$ )  $\delta$  (ppm): 171.6, 148.2, 137.6, 133.9, 129.4, 128.7, 128.5, 128.4, 128.3, 125.8, 125.6,

122.4, 117.6, 85.0, 75.3, 67.8, 62.4, 55.6, 45.6, 43.0, 39.4, 32.5, 14.2; IR (KBr): 3405, 2987, 1718, 1551, 1481, 1300, 1216, 1036, 858, 760  $\text{cm}^{-1}$ ; HRMS (ESI)  $m/z$ :  $[\text{M}+\text{H}]^+$  calcd. for  $\text{C}_{23}\text{H}_{23}\text{BrNO}_6$  488.0703, found 488.0707.

**Ethyl 1-(4-bromophenyl)-3-hydroxy-9a-nitro-2,3,4,4a,9,9a-hexahydro-1H-3,9-methanoxan-**

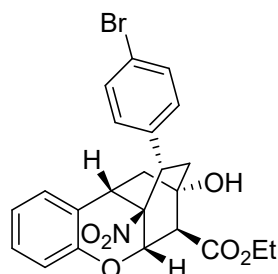

**thene-4-carboxylate (3g).** The product **3g** was obtained as a white solid (35.2 mg, 72% yield).  $^1\text{H}$  NMR (400 MHz,  $\text{CDCl}_3$ )  $\delta$  (ppm): 7.49 (d,  $J = 8.8$  Hz, 2H), 7.16-7.11 (m, 3H), 7.06 (dd,  $J = 7.6, 1.2$  Hz, 1H), 6.94 (td,  $J = 7.4, 1.0$  Hz, 1H), 6.82 (d,  $J = 8.0$  Hz, 1H), 5.60 (dd,  $J = 4.0, 3.2$  Hz, 1H), 4.35 (q,  $J = 7.2$  Hz, 2H), 3.79 (d,  $J = 11.6$  Hz, 1H),

3.75 (dd,  $J = 12.0, 5.2$  Hz, 1H), 3.24 (br s, 1H), 2.97 (dd,  $J = 4.0, 2.4$  Hz, 1H), 2.74 (t,  $J = 12.4$  Hz, 1H), 2.60 (td,  $J = 13.4, 3.8$  Hz, 1H), 1.99-1.92 (m, 2H), 1.38 (t,  $J = 7.0$  Hz, 3H);  $^{13}\text{C}$  NMR (100 MHz,  $\text{CDCl}_3$ )  $\delta$  (ppm): 171.6, 148.1, 136.0, 132.3, 129.8, 128.6, 128.5, 126.2, 122.7, 122.5, 117.7, 86.8, 75.4, 67.8, 62.3, 55.2, 45.3, 44.9, 37.3, 31.3, 14.2; IR (KBr): 3471, 2939, 1732, 1554, 1492, 1347, 1201, 1031, 833, 759  $\text{cm}^{-1}$ ; HRMS (ESI)  $m/z$ :  $[\text{M}+\text{H}]^+$  calcd. for  $\text{C}_{23}\text{H}_{23}\text{BrNO}_6$  488.0703, found 488.0698.

**Ethyl 3-hydroxy-1-(4-methoxyphenyl)-9a-nitro-2,3,4,4a,9,9a-hexahydro-1H-3,9-methanoxan-**

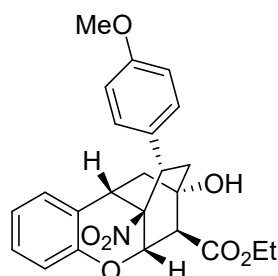

**thene-4-carboxylate (a 8:1 mixture of diastereomers) (3h).** The product **3h** was obtained as a white solid (33.0 mg, 75% yield).  $^1\text{H}$  NMR (400 MHz,  $\text{CDCl}_3$ )  $\delta$  (ppm): 7.19 (d,  $J = 8.4$  Hz, 2H), 7.12 (t,  $J = 8.0$  Hz, 1H), 7.07 (d,  $J = 7.2$  Hz, 1H), 6.93 (t,  $J = 8.0$  Hz, 1H), 6.89 (d,  $J = 8.8$  Hz, 2H), 6.82 (d,  $J = 8.0$  Hz, 1H), 5.62 (t,  $J = 3.2$  Hz, 1H),

4.35 (q,  $J = 7.0$  Hz, 2H), 3.81 (d,  $J = 15.6$  Hz, 1H), 3.79 (s, 3H), 3.74 (dd,  $J = 12.4, 5.2$  Hz, 1H), 3.26 (br s, 1H), 2.97 (t,  $J = 2.8$  Hz, 1H), 2.77 (t,  $J = 12.4$  Hz, 1H), 2.58 (td,  $J = 13.0, 3.0$  Hz, 1H), 2.00-1.94 (m, 2H), 1.38 (t,  $J = 7.2$  Hz, 3H);  $^{13}\text{C}$  NMR (100 MHz,  $\text{CDCl}_3$ )  $\delta$  (ppm): 171.7, 159.4, 148.2, 129.2, 128.8, 128.5, 128.4, 126.5, 122.5, 117.6, 114.5, 87.1, 75.5, 67.9, 62.3, 55.22, 55.21, 45.3, 44.8, 37.6, 31.3, 14.2; IR (KBr): 3496, 2973, 1731, 1555, 1463, 1347, 1193, 1034, 836, 761  $\text{cm}^{-1}$ ; HRMS (ESI)  $m/z$ :  $[\text{M}+\text{H}]^+$  calcd. for  $\text{C}_{24}\text{H}_{26}\text{NO}_7$  440.1704, found 440.1705.

**Ethyl 3-hydroxy-9a-nitro-1-(*o*-tolyl)-2,3,4,4a,9,9a-hexahydro-1H-3,9-methanoxanthene-4-carboxylate (a 9:1 mixture of diastereomers) (3i).** The product **3i** was obtained as a white solid



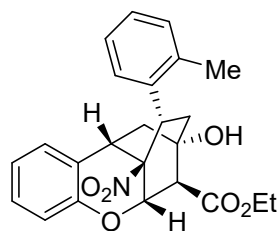

(29.6 mg, 70% yield).  $^1\text{H NMR}$  (400 MHz,  $\text{CDCl}_3$ )  $\delta$  (ppm): 7.47 (d,  $J = 7.6$  Hz, 1H), 7.31 (t,  $J = 7.4$  Hz, 1H), 7.18 (t,  $J = 7.6$  Hz, 1H), 7.15-7.11 (m, 3H), 6.95 (t,  $J = 7.4$  Hz, 1H), 6.83 (d,  $J = 7.6$  Hz, 1H), 5.65 (s, 1H), 4.37 (q,  $J = 7.0$  Hz, 2H), 4.23-4.17 (m, 2H), 3.07 (br s, 1H), 3.01 (s, 1H) 2.82 (t,  $J = 12.6$  Hz, 1H), 2.60 (td,  $J = 12.6, 3.0$  Hz, 1H), 2.31 (s, 3H), 2.00 (d,  $J = 13.2$  Hz, 1H), 1.84 (dd,  $J = 13.0, 6.2$  Hz, 1H), 1.39 (t,  $J = 7.2$  Hz, 3H);  $^{13}\text{C NMR}$  (100 MHz,  $\text{CDCl}_3$ )  $\delta$  (ppm): 171.8, 148.2, 137.2, 136.4, 131.3, 128.5, 127.7, 127.2, 126.8, 126.2, 122.4, 117.5, 85.5, 75.7, 68.1, 62.3, 55.8, 45.8, 39.9, 39.6, 32.3, 19.7, 14.2; IR (KBr): 3474, 2971, 1713, 1551, 1465, 1350, 1218, 1034, 844, 756  $\text{cm}^{-1}$ ; HRMS (ESI)  $m/z$ :  $[\text{M}+\text{H}]^+$  calcd. for  $\text{C}_{24}\text{H}_{26}\text{NO}_6$  424.1755, found 424.1751.

**Ethyl 3-hydroxy-9a-nitro-1-(*m*-tolyl)-2,3,4,4a,9,9a-hexahydro-1H-3,9-methanoxanthene-4-**

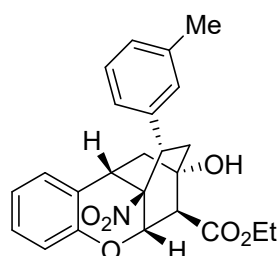

**carboxylate (a 11:1 mixture of diastereomers) (3j).** The product **3j** was obtained as a white solid (28.4 mg, 67% yield).  $^1\text{H NMR}$  (400 MHz,  $\text{CDCl}_3$ )  $\delta$  (ppm): 7.26 (t,  $J = 7.6$  Hz, 1H), 7.14-7.05 (m, 5H), 6.94 (t,  $J = 7.4$  Hz, 1H), 6.82 (d,  $J = 8.0$  Hz, 1H), 5.63 (t,  $J = 3.0$  Hz, 1H), 4.36 (q,  $J = 7.0$  Hz, 2H), 3.84 (d,  $J = 11.6$  Hz, 1H), 3.74 (dd,  $J = 12.0, 5.2$  Hz, 1H), 3.26 (br s, 1H), 2.98 (t,  $J = 2.8$  Hz, 1H), 2.81 (t,  $J = 12.4$  Hz, 1H), 2.58 (td,  $J = 13.0, 3.4$  Hz, 1H), 2.36 (s, 3H), 2.04-1.95 (m, 2H), 1.39 (t,  $J = 7.2$  Hz, 3H);  $^{13}\text{C NMR}$  (100 MHz,  $\text{CDCl}_3$ )  $\delta$  (ppm): 171.7, 148.2, 138.7, 136.9, 129.1, 129.00, 128.96, 128.5, 128.4, 126.5, 125.1, 122.5, 117.6, 87.0, 75.5, 67.9, 62.3, 55.2, 45.4, 45.3, 37.4, 31.4, 21.6, 14.2; IR (KBr): 3526, 2986, 1731, 1549, 1463, 1337, 1195, 1035, 839, 758  $\text{cm}^{-1}$ ; HRMS (ESI)  $m/z$ :  $[\text{M}+\text{H}]^+$  calcd. for  $\text{C}_{24}\text{H}_{26}\text{NO}_6$  424.1755, found 424.1756.

**Ethyl 3-hydroxy-9a-nitro-1-(*p*-tolyl)-2,3,4,4a,9,9a-hexahydro-1H-3,9-methanoxanthene-4-**

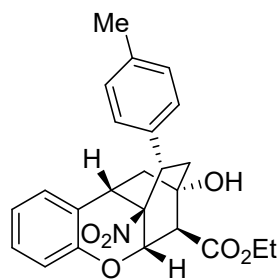

**carboxylate (a 8:1 mixture of diastereomers) (3k).** The product **3k** was obtained as a white solid (33.0 mg, 78% yield).  $^1\text{H NMR}$  (400 MHz,  $\text{CDCl}_3$ )  $\delta$  (ppm): 7.21-7.15 (m, 4H), 7.11 (d,  $J = 8.0$  Hz, 1H), 7.07 (d,  $J = 7.2$  Hz, 1H), 6.93 (t,  $J = 7.4$  Hz, 1H), 6.82 (d,  $J = 8.4$  Hz, 1H), 5.63 (t,  $J = 3.2$  Hz, 1H), 4.35 (q,  $J = 7.0$  Hz, 2H), 3.83 (d,  $J = 11.6$  Hz, 1H), 3.75 (dd,  $J = 12.0, 5.2$  Hz, 1H), 3.26 (br s, 1H), 2.98 (t,  $J = 2.8$  Hz, 1H), 2.79 (t,  $J =$

12.4 Hz, 1H), 2.58 (td,  $J = 13.0, 3.0$  Hz, 1H), 2.34 (s, 3H), 2.03-1.94 (m, 2H), 1.38 (t,  $J = 7.2$  Hz, 3H);  $^{13}\text{C}$  NMR (100 MHz,  $\text{CDCl}_3$ )  $\delta$  (ppm): 171.7, 148.2, 138.1, 133.9, 129.8, 128.5, 128.4, 128.0, 126.5, 122.5, 117.6, 87.1, 75.5, 67.9, 62.2, 55.2, 45.3, 45.1, 37.4, 31.3, 21.0, 14.2; IR (KBr): 3504, 2982, 1732, 1555, 1463, 1347, 1201, 1034, 829, 761  $\text{cm}^{-1}$ ; HRMS (ESI)  $m/z$ :  $[\text{M}+\text{H}]^+$  calcd. for  $\text{C}_{24}\text{H}_{26}\text{NO}_6$  424.1755, found 424.1755.

**Ethyl 1-(furan-2-yl)-3-hydroxy-9a-nitro-2,3,4,4a,9,9a-hexahydro-1H-3,9-methanoxanthene-**

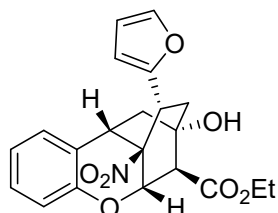

**4-carboxylate (a 8:1 mixture of diastereomers) (3l).** The product **3l**

was obtained as a white solid (26.4 mg, 66% yield).  $^1\text{H}$  NMR (400 MHz,  $\text{CDCl}_3$ )  $\delta$  (ppm): 7.44 (s, 1H), 7.14 (t,  $J = 7.6$  Hz, 1H), 7.10 (d,  $J = 6.8$  Hz, 1H), 6.96 (t,  $J = 7.4$  Hz, 1H), 6.82 (d,  $J = 8.4$  Hz, 1H), 6.34-6.32 (m, 1H), 6.19 (d,  $J = 3.2$  Hz, 1H), 5.52 (t,  $J = 3.0$  Hz, 1H), 4.33 (q,  $J = 7.2$  Hz, 2H), 3.95 (dd,  $J = 12.2, 4.2$  Hz, 1H), 3.81 (d,  $J = 11.6$  Hz, 1H), 3.17 (br s, 1H), 2.97 (t,  $J = 2.8$  Hz, 1H), 2.86 (t,  $J = 12.0$  Hz, 1H), 2.51 (td,  $J = 12.4, 3.2$  Hz, 1H), 2.06 (d,  $J = 13.2$  Hz, 1H), 1.89 (dd,  $J = 12.8, 3.2$  Hz, 1H), 1.36 (t,  $J = 7.2$  Hz, 3H);  $^{13}\text{C}$  NMR (100 MHz,  $\text{CDCl}_3$ )  $\delta$  (ppm): 171.6, 150.2, 148.2, 143.3, 128.7, 128.4, 126.7, 122.7, 117.7, 110.6, 109.0, 86.6, 74.9, 68.0, 62.2, 54.3, 44.4, 38.9, 34.5, 32.2, 14.2; IR (KBr): 3476, 2938, 1718, 1558, 1462, 1349, 1206, 1034, 838, 761  $\text{cm}^{-1}$ ; HRMS (ESI)  $m/z$ :  $[\text{M}+\text{H}]^+$  calcd. for  $\text{C}_{21}\text{H}_{22}\text{NO}_7$  440.1391, found 440.1390.

**Ethyl 3-hydroxy-9a-nitro-1-(thiophen-2-yl)-2,3,4,4a,9,9a-hexahydro-1H-3,9-methanoxan-**

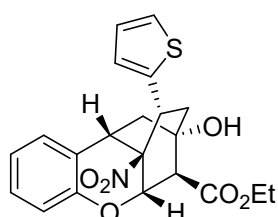

**thene-4-carboxylate (3m).** The product **3m** was obtained as a white

solid (24.9 mg, 60% yield).  $^1\text{H}$  NMR (400 MHz,  $\text{CDCl}_3$ )  $\delta$  (ppm): 7.30 (d,  $J = 5.2$  Hz, 1H), 7.14 (t,  $J = 7.2$  Hz, 1H), 7.11 (d,  $J = 7.2$  Hz, 1H), 6.96 (t,  $J = 6.8$  Hz, 2H), 6.86 (d,  $J = 2.8$  Hz, 1H), 6.83 (d,  $J = 8.0$  Hz, 1H), 5.56 (t,  $J = 3.4$  Hz, 1H), 4.34 (q,  $J = 7.2$  Hz, 2H), 4.18 (dd,  $J = 12.0, 4.4$  Hz, 1H), 3.93 (d,  $J = 11.2$  Hz, 1H), 3.21 (br s, 1H), 2.98 (t,  $J = 2.8$  Hz, 1H), 2.82 (t,  $J = 12.4$  Hz, 1H), 2.74 (td,  $J = 13.4, 3.0$  Hz, 1H), 2.02-1.94 (m, 2H), 1.37 (t,  $J = 7.2$  Hz, 3H);  $^{13}\text{C}$  NMR (100 MHz,  $\text{CDCl}_3$ )  $\delta$  (ppm): 171.6, 148.2, 140.2, 128.7, 128.5, 127.5, 127.4, 126.6, 125.7, 122.7, 117.7, 87.3, 75.2, 67.9, 62.3, 54.4, 44.7, 40.9, 39.7, 31.5, 14.2; IR (KBr): 3473, 2968, 1731, 1555, 1461, 1346, 1200, 1033, 848, 761  $\text{cm}^{-1}$ ; HRMS (ESI)  $m/z$ :  $[\text{M}+\text{H}]^+$  calcd. for  $\text{C}_{21}\text{H}_{22}\text{NO}_6\text{S}$  416.1162, found 416.1159.

**Ethyl 3-hydroxy-1-(naphthalen-1-yl)-9a-nitro-2,3,4,4a,9,9a-hexahydro-1H-3,9-methanoxan-**

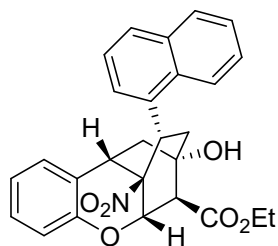

**thene-4-carboxylate (a 8:1 mixture of diastereomers) (3n).** The product **3n** was obtained as a white solid (28.0 mg, 61% yield).  $^1\text{H}$  NMR (400 MHz,  $\text{CDCl}_3$ )  $\delta$  (ppm): 8.10 (d,  $J = 8.4$  Hz, 1H), 7.83 (t,  $J = 7.0$  Hz, 2H), 7.72 (d,  $J = 7.2$  Hz, 1H), 7.57 (t,  $J = 7.6$  Hz, 1H), 7.53 (d,  $J = 8.0$  Hz, 1H), 7.48 (t,  $J = 7.4$  Hz, 1H), 7.13 (d,  $J = 6.4$  Hz, 2H), 6.95 (t,  $J = 7.4$  Hz, 1H), 6.84 (d,  $J = 8.4$  Hz, 1H), 5.82 (t,  $J = 3.2$  Hz, 1H), 4.89 (dd,  $J = 11.8, 5.8$  Hz, 1H), 4.41 (q,  $J = 7.0$  Hz, 2H), 4.21 (d,  $J = 11.6$  Hz, 1H), 3.09 (br s, 1H), 2.92 (t,  $J = 12.4$  Hz, 1H), 2.76 (td,  $J = 12.8, 2.4$  Hz, 1H), 2.06 (d,  $J = 14.8$  Hz, 2H), 2.01 (dd,  $J = 13.2, 4.8$  Hz, 1H), 1.42 (t,  $J = 7.0$  Hz, 3H);  $^{13}\text{C}$  NMR (100 MHz,  $\text{CDCl}_3$ )  $\delta$  (ppm): 171.9, 148.3, 134.5, 133.9, 132.0, 128.9, 128.8, 128.6, 126.7, 126.3, 126.1, 125.2, 125.1, 122.5, 122.3, 117.6, 85.7, 75.9, 68.1, 62.4, 55.7, 45.7, 40.2, 38.2, 32.4, 14.3; IR (KBr): 3457, 2938, 1706, 1550, 1463, 1346, 1216, 1033, 794, 752  $\text{cm}^{-1}$ ; HRMS (ESI)  $m/z$ :  $[\text{M}+\text{H}]^+$  calcd. for  $\text{C}_{27}\text{H}_{26}\text{NO}_6$  460.1755, found 460.1750.

**Ethyl 3-hydroxy-1-(naphthalen-2-yl)-9a-nitro-2,3,4,4a,9,9a-hexahydro-1H-3,9-methanoxan-**

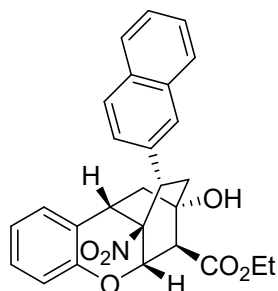

**thene-4-carboxylate (a 10:1 mixture of diastereomers) (3o).** The product **3o** was obtained as a white solid (32.2 mg, 70% yield).  $^1\text{H}$  NMR (400 MHz,  $\text{CDCl}_3$ )  $\delta$  (ppm): 7.87 (d,  $J = 8.8$  Hz, 1H), 7.84-7.81 (m, 2H), 7.73 (s, 1H), 7.53-7.48 (m, 2H), 7.41 (d,  $J = 8.8$  Hz, 1H), 7.13 (t,  $J = 7.8$  Hz, 1H), 7.09 (d,  $J = 7.6$  Hz, 1H), 6.93 (t,  $J = 7.2$  Hz, 1H), 6.84 (d,  $J = 8.4$  Hz, 1H), 5.71 (t,  $J = 3.4$  Hz, 1H), 4.38 (q,  $J = 7.2$  Hz, 2H), 3.98 (dd,  $J = 12.0, 5.2$  Hz, 1H), 3.92 (d,  $J = 12.0$  Hz, 1H), 3.31 (br s, 1H), 3.03 (dd,  $J = 3.6, 2.4$  Hz, 1H), 2.93 (t,  $J = 12.4$  Hz, 1H), 2.68 (td,  $J = 13.0, 3.0$  Hz, 1H), 2.16 (ddd,  $J = 13.6, 4.8, 2.0$  Hz, 1H), 2.03 (d,  $J = 13.2$  Hz, 1H), 1.40 (t,  $J = 7.0$  Hz, 3H);  $^{13}\text{C}$  NMR (100 MHz,  $\text{CDCl}_3$ )  $\delta$  (ppm): 171.7, 148.2, 134.3, 133.2, 132.9, 129.0, 128.54, 128.48, 128.0, 127.7, 127.6, 126.53, 126.48, 126.47, 125.4, 122.6, 117.6, 87.1, 75.6, 68.0, 62.3, 55.3, 45.6, 45.4, 37.4, 31.5, 14.2; IR (KBr): 3577, 2983, 1740, 1550, 1462, 1347, 1198, 1032, 819, 758  $\text{cm}^{-1}$ ; HRMS (ESI)  $m/z$ :  $[\text{M}+\text{H}]^+$  calcd. for  $\text{C}_{27}\text{H}_{26}\text{NO}_6$  460.1755, found 460.1756.

**Ethyl 3-hydroxy-7-methyl-9a-nitro-1-phenyl-2,3,4,4a,9,9a-hexahydro-1H-3,9-methanoxan-**

**thene-4-carboxylate (a 7:1 mixture of diastereomers) (3p).** The product **3p** was obtained as a white solid (28.8 mg, 68% yield).  $^1\text{H}$  NMR (400 MHz,  $\text{CDCl}_3$ )  $\delta$  (ppm): 7.39-7.32 (m, 3H), 7.27

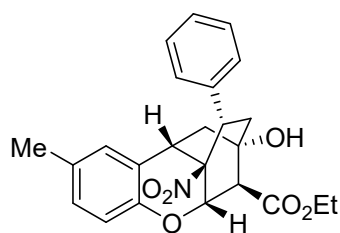

(d,  $J = 8.0$  Hz, 2H), 6.92 (d,  $J = 8.4$  Hz, 1H), 6.87 (s, 1H), 6.72 (d,  $J = 8.4$  Hz, 1H), 5.61 (t,  $J = 2.8$  Hz, 1H), 4.35 (q,  $J = 7.0$  Hz, 2H), 3.78 (d,  $J = 12.0$  Hz, 2H), 3.26 (br s, 1H), 2.98 (s, 1H), 2.79 (t,  $J = 12.4$  Hz, 1H), 2.60 (td,  $J = 13.0, 3.0$  Hz, 1H), 2.24 (s, 3H), 2.04-1.95 (m, 2H), 1.38 (t,  $J = 7.0$  Hz, 3H);  $^{13}\text{C}$  NMR (100 MHz,  $\text{CDCl}_3$ )  $\delta$  (ppm): 171.8, 145.9, 137.0, 131.9, 129.2, 129.1, 128.7, 128.3, 128.2, 126.1, 117.4, 87.1, 75.5, 68.0, 62.2, 55.1, 45.5, 45.3, 37.3, 31.3, 20.5, 14.2; IR (KBr): 3493, 2939, 1731, 1555, 1465, 1348, 1208, 1034, 818, 733  $\text{cm}^{-1}$ ; HRMS (ESI)  $m/z$ :  $[\text{M}+\text{H}]^+$  calcd. for  $\text{C}_{24}\text{H}_{26}\text{NO}_6$  424.1755, found 424.1750.

**Ethyl 1-(4-chlorophenyl)-3-hydroxy-7-methyl-9a-nitro-2,3,4,4a,9,9a-hexahydro-1H-3,9-methanoxanthene-4-carboxylate (a 14:1 mixture of diastereomers) (3q).**

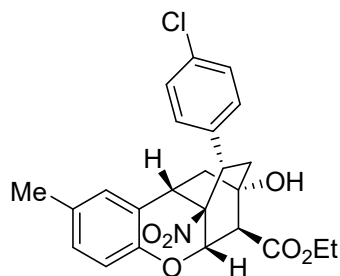

**(a 14:1 mixture of diastereomers) (3q).** The product **3q** was obtained as a white solid (31.1 mg, 68% yield).  $^1\text{H}$  NMR (400 MHz,  $\text{CDCl}_3$ )  $\delta$  (ppm): 7.34 (d,  $J = 8.0$  Hz, 2H), 7.20 (d,  $J = 8.0$  Hz, 2H), 6.93 (d,  $J = 8.4$  Hz, 1H), 6.88 (s, 1H), 6.71 (d,  $J = 8.0$  Hz, 1H), 5.58 (s, 1H), 4.34 (q,  $J = 7.2$  Hz, 2H), 3.78-3.72 (m, 2H), 3.24 (br s, 1H), 2.97 (s, 1H), 2.73 (t,  $J = 12.4$  Hz, 1H), 2.60 (t,  $J = 12.8$  Hz, 1H), 2.24 (s, 3H), 1.98-1.92 (m, 2H), 1.37 (t,  $J = 7.0$  Hz, 3H);  $^{13}\text{C}$  NMR (100 MHz,  $\text{CDCl}_3$ )  $\delta$  (ppm): 171.7, 145.8, 135.5, 134.3, 132.0, 129.5, 129.31, 129.29, 128.7, 125.9, 117.4, 87.0, 75.4, 67.9, 62.3, 55.1, 45.3, 44.9, 37.3, 31.2, 20.5, 14.2; IR (KBr): 3493, 2939, 1731, 1555, 1465, 1348, 1208, 1034, 818, 733  $\text{cm}^{-1}$ ; IR (KBr): 3492, 2974, 1731, 1555, 1467, 1349, 1210, 1031, 826, 734  $\text{cm}^{-1}$ ; HRMS (ESI)  $m/z$ :  $[\text{M}+\text{H}]^+$  calcd. for  $\text{C}_{24}\text{H}_{25}\text{ClNO}_6$  458.1365, found 458.1361.

**Ethyl 3-hydroxy-7-methyl-9a-nitro-1-(*p*-tolyl)-2,3,4,4a,9,9a-hexahydro-1H-3,9-methanoxanthene-4-carboxylate (a 7:1 mixture of diastereomers) (3r).**

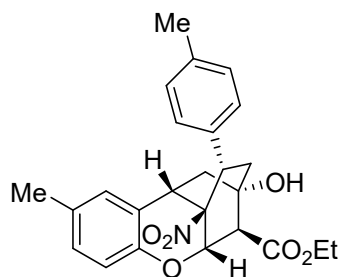

**(a 7:1 mixture of diastereomers) (3r).** The product **3r** was obtained as a white solid (22.3 mg, 51% yield).  $^1\text{H}$  NMR (400 MHz,  $\text{CDCl}_3$ )  $\delta$  (ppm): 7.20-7.14 (m, 4H), 6.92 (d,  $J = 8.4$  Hz, 1H), 6.88 (s, 1H), 6.71 (d,  $J = 8.0$  Hz, 1H), 5.60 (t,  $J = 2.8$  Hz, 1H), 4.35 (q,  $J = 7.2$  Hz, 2H), 3.79-3.72 (m, 2H), 3.27 (br s, 1H), 2.97 (s, 1H), 2.78 (t,  $J = 12.2$  Hz, 1H), 2.58 (td,  $J = 13.0, 2.6$  Hz, 1H), 2.33 (s, 3H), 2.24 (s, 3H), 2.02-1.94 (m, 2H), 1.38 (t,  $J = 7.0$  Hz, 3H);  $^{13}\text{C}$  NMR (100 MHz,  $\text{CDCl}_3$ )  $\delta$

(ppm): 171.8, 145.9, 138.0, 133.9, 131.8, 129.8, 129.2, 128.8, 128.0, 126.2, 117.3, 87.2, 75.5, 68.0, 62.2, 55.1, 45.3, 45.1, 37.4, 31.3, 21.0, 20.5, 14.2; IR (KBr): 3502, 2941, 1734, 1556, 1465, 1349, 1208, 1034, 822, 769  $\text{cm}^{-1}$ ; HRMS (ESI)  $m/z$ :  $[M+H]^+$  calcd. for  $\text{C}_{25}\text{H}_{28}\text{NO}_6$  438.1911, found 438.1906.

**Ethyl 7-chloro-3-hydroxy-9a-nitro-1-phenyl-2,3,4,4a,9,9a-hexahydro-1H-3,9-methanoxan-**

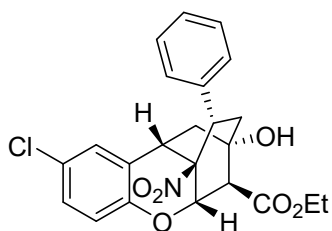

**thene-4-carboxylate (a 5:1 mixture of diastereomers) (3s).** The

product **3s** was obtained as a White solid (22.2 mg, 50% yield).

$^1\text{H}$  NMR (400 MHz,  $\text{CDCl}_3$ )  $\delta$  (ppm): 7.39-7.31 (m, 4H), 7.24 (s, 1H), 7.12-7.07 (m, 2H), 6.77 (d,  $J = 9.2$  Hz, 1H), 5.63 (t,  $J = 2.8$

Hz, 1H), 4.36 (q,  $J = 7.2$  Hz, 2H), 3.80-3.76 (m, 2H), 3.26 (br s, 1H), 2.93 (s, 1H), 2.80 (t,  $J = 12.6$  Hz, 1H), 2.59 (td,  $J = 13.2, 3.2$  Hz, 1H), 2.03 (dd,  $J = 13.4, 3.4$  Hz, 1H), 1.95 (d,  $J = 13.2$  Hz, 1H), 1.39 (t,  $J = 7.2$  Hz, 3H);  $^{13}\text{C}$  NMR (100 MHz,  $\text{CDCl}_3$ )  $\delta$  (ppm): 171.5, 146.8, 136.6, 129.2, 129.0, 128.6, 128.4, 128.1, 128.0, 127.2, 119.7, 86.7, 75.7, 67.8, 62.4, 55.2, 45.2, 45.0, 37.3, 31.3, 14.2; IR (KBr): 3494, 2940, 1729, 1555, 1486, 1350, 1199, 1032, 820, 705  $\text{cm}^{-1}$ ; HRMS (ESI)  $m/z$ :  $[M+H]^+$  calcd. for  $\text{C}_{23}\text{H}_{23}\text{ClNO}_6$  444.1208, found 444.1206.

**Ethyl 7-chloro-1-(4-chlorophenyl)-3-hydroxy-9a-nitro-2,3,4,4a,9,9a-hexahydro-1H-3,9-me-**

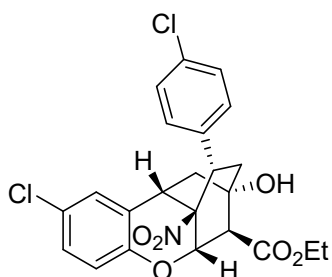

**thanoxanthene-4-carboxylate (a 10:1 mixture of diastereomers) (3t).** The product **3t** was obtained as a white solid

(29.2 mg, 61% yield).  $^1\text{H}$  NMR (400 MHz,  $\text{CDCl}_3$ )  $\delta$  (ppm): 7.34

(d,  $J = 8.0$  Hz, 2H), 7.18 (d,  $J = 8.4$  Hz, 2H), 7.10-7.08 (m, 2H), 6.77 (d,  $J = 9.2$  Hz, 1H), 5.61 (t,  $J = 2.8$  Hz, 1H), 4.35 (q,  $J = 7.2$

Hz, 2H), 3.78-3.74 (m, 2H), 3.24 (br s, 1H), 2.93 (s, 1H), 2.74 (t,  $J = 12.4$  Hz, 1H), 2.58 (td,  $J = 13.2, 3.2$  Hz, 1H), 1.97-1.93 (m, 2H), 1.38 (t,  $J = 7.0$  Hz, 3H);  $^{13}\text{C}$  NMR (100 MHz,  $\text{CDCl}_3$ )  $\delta$  (ppm): 171.4, 146.7, 135.1, 134.5, 129.45, 129.40, 128.7, 128.1, 127.7, 127.3, 119.1, 86.5, 75.6, 67.7, 62.5, 55.2, 45.0, 44.7, 37.2, 31.2, 14.2; IR (KBr): 3491, 2978, 1731, 1555, 1489, 1350, 1199, 1029, 827, 734  $\text{cm}^{-1}$ ; HRMS (ESI)  $m/z$ :  $[M+H]^+$  calcd. for  $\text{C}_{23}\text{H}_{22}\text{Cl}_2\text{NO}_6$  478.0819, found 478.0819.

**Ethyl 7-chloro-3-hydroxy-9a-nitro-1-(*p*-tolyl)-2,3,4,4a,9,9a-hexahydro-1H-3,9-methanoxan-**  
**thene-4-carboxylate (a 5:1 mixture of diastereomers) (3u).** The product **3u** was obtained as a

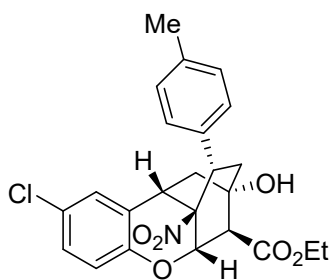

white solid (26.1 mg, 57% yield).  $^1\text{H}$  NMR (400 MHz,  $\text{CDCl}_3$ )  $\delta$  (ppm): 7.22-7.12 (m, 4H), 7.08-7.06 (m, 2H), 6.76 (d,  $J = 9.2$  Hz, 1H), 5.63 (t,  $J = 3.2$  Hz, 1H), 4.35 (q,  $J = 7.0$  Hz, 1H), 3.80-3.73 (m, 2H), 3.30 (br s, 1H), 2.93 (t,  $J = 2.8$  Hz, 1H), 2.78 (t,  $J = 12.4$  Hz, 1H), 2.57 (td,  $J = 13.0, 3.0$  Hz, 1H), 2.33 (s, 3H), 2.00 (dd,  $J = 13.4, 3.0$  Hz, 1H), 1.93 (d,  $J = 13.2$  Hz, 1H), 1.38 (t,  $J = 7.2$  Hz, 3H);  $^{13}\text{C}$  NMR (100 MHz,  $\text{CDCl}_3$ )  $\delta$  (ppm): 171.5, 146.8, 138.2, 133.5, 129.8, 128.5, 128.1, 128.0, 127.9, 127.1, 119.0, 86.7, 75.7, 67.8, 62.3, 55.3, 45.0, 44.8, 37.2, 31.2, 21.0, 14.2; IR (KBr): 3509, 2983, 1732, 1555, 1484, 1350, 1197, 1032, 823, 734  $\text{cm}^{-1}$ ; HRMS (ESI)  $m/z$ :  $[\text{M}+\text{H}]^+$  calcd. for  $\text{C}_{24}\text{H}_{25}\text{ClNO}_6$  458.1365, found 458.1367.

**Ethyl 5-chloro-3-hydroxy-9a-nitro-1-phenyl-2,3,4,9a-tetrahydro-1H-3,9-methanoxan-**

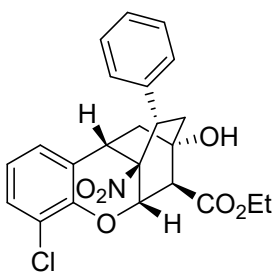

**thene-4-carboxylate (a 13:1 mixture of diastereomers) (3v).** The

product **3v** was obtained as a white solid (32.4 mg, 73% yield).  $^1\text{H}$  NMR (400 MHz,  $\text{CDCl}_3$ )  $\delta$  (ppm): 7.39-7.32 (m, 3H), 7.27 (d,  $J = 6.4$  Hz, 2H), 7.20 (dd,  $J = 8.0, 1.2$  Hz, 1H), 6.99 (d,  $J = 7.6$  Hz, 1H), 6.87 (t,  $J = 7.8$  Hz, 1H), 5.80 (t,  $J = 3.4$  Hz, 1H), 4.36 (q,  $J = 7.2$  Hz, 2H), 3.86 (d,  $J = 11.6$  Hz, 1H), 3.81 (dd,  $J = 12.0, 5.6$  Hz, 1H), 3.25 (br s, 1H), 2.95 (dd,  $J = 3.4, 2.6$  Hz, 1H), 2.81 (t,  $J = 12.4$  Hz, 1H), 2.57 (td,  $J = 13.0, 3.0$  Hz, 1H), 2.03 (ddd,  $J = 13.6, 5.4, 2.2$  Hz, 1H), 1.93 (d,  $J = 12.0$  Hz, 1H), 1.38 (t,  $J = 7.2$  Hz, 3H);  $^{13}\text{C}$  NMR (100 MHz,  $\text{CDCl}_3$ )  $\delta$  (ppm): 171.3, 144.3, 136.7, 129.2, 129.1, 128.4, 128.3, 126.8, 122.7, 122.4, 86.7, 76.0, 67.7, 62.4, 55.7, 45.2, 37.3, 31.4, 14.2; IR (KBr): 3441, 2936, 1744, 1555, 1462, 1324, 1194, 1033, 785, 738  $\text{cm}^{-1}$ ; HRMS (ESI)  $m/z$ :  $[\text{M}+\text{H}]^+$  calcd. for  $\text{C}_{23}\text{H}_{23}\text{ClNO}_6$  444.1208, found 444.1205.

**Ethyl 3-hydroxy-5-methyl-9a-nitro-1-phenyl-2,3,4,9a-tetrahydro-1H-3,9-methanoxan-**

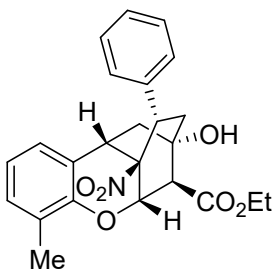

**thene-4-carboxylate (a 13:1 mixture of diastereomers) (3w).** The

product **3w** was obtained as a white solid (22.9 mg, 54%).  $^1\text{H}$  NMR (400 MHz,  $\text{CDCl}_3$ )  $\delta$  (ppm): 7.40-7.32 (m, 3H), 7.28 (d,  $J = 7.2$  Hz, 2H), 6.97 (d,  $J = 7.2$  Hz, 1H), 6.91 (d,  $J = 7.2$  Hz, 1H), 6.83 (t,  $J = 7.4$  Hz, 1H), 5.67 (t,  $J = 3.4$  Hz, 1H), 4.39-4.33 (m, 2H), 3.84-3.77 (m, 2H), 3.20 (br s, 1H), 2.95 (dd,  $J = 3.6, 2.4$  Hz, 1H), 2.80 (t,  $J = 12.4$  Hz, 1H), 2.61 (td,  $J = 12.8,$

3.2 Hz, 1H), 2.14 (s, 3H), 2.03 (ddd,  $J = 13.6, 5.0, 2.2$  Hz, 1H), 1.96 (dd,  $J = 13.4, 1.8$  Hz, 1H), 1.39 (t,  $J = 7.2$  Hz, 3H);  $^{13}\text{C}$  NMR (100 MHz,  $\text{CDCl}_3$ )  $\delta$  (ppm): 171.8, 146.3, 137.1, 129.6, 129.1, 128.3, 128.2, 126.9, 126.03, 125.99, 122.0, 87.1, 75.5, 67.9, 62.2, 55.4, 45.5, 45.4, 37.4, 31.4, 15.8, 14.2; IR (KBr): 3517, 2986, 1733, 1552, 1469, 1337, 1196, 1038, 785, 738  $\text{cm}^{-1}$ ; HRMS (ESI)  $m/z$ :  $[\text{M}+\text{H}]^+$  calcd. for  $\text{C}_{24}\text{H}_{26}\text{NO}_6$  424.1755, found 424.1751.

**Methyl 3-hydroxy-9a-nitro-1-phenyl-2,3,4,4a,9,9a-hexahydro-1H-3,9-methanoxanthene-4-**

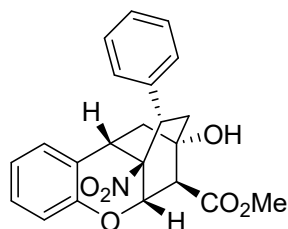

**car-boxylate (a 8:1 mixture of diastereomers) (3x).** The product **3x**

was obtained as a white solid (23.7 mg, 60% yield).  $^1\text{H}$  NMR (400 MHz,  $\text{CDCl}_3$ )  $\delta$  (ppm): 7.39-7.32 (m, 3H), 7.27 (d,  $J = 9.6$  Hz, 2H),

7.12 (t,  $J = 7.8$  Hz, 1H), 7.07 (d,  $J = 7.2$  Hz, 1H), 6.94 (t,  $J = 7.4$  Hz,

1H), 6.82 (d,  $J = 8.0$  Hz, 1H), 5.63 (t,  $J = 3.0$  Hz, 1H), 3.88-3.78 (m, 5H), 3.30 (br s, 1H), 3.01 (s, 1H), 2.79 (t,  $J = 12.4$  Hz, 1H), 2.62 (td,  $J = 12.8, 2.8$  Hz, 1H), 2.05-1.96 (m, 2H);  $^{13}\text{C}$  NMR (100 MHz,  $\text{CDCl}_3$ )  $\delta$  (ppm): 172.2, 148.0, 136.9, 129.1, 128.5, 128.4, 128.3, 128.1, 126.4, 122.5, 117.6, 86.9, 75.5, 67.9, 55.1, 52.9, 45.4, 45.2, 37.2, 31.3; IR (KBr): 3508, 2970, 1735, 1554, 1454, 1350, 1216, 1032, 847, 764  $\text{cm}^{-1}$ ; HRMS (ESI)  $m/z$ :  $[\text{M}+\text{Na}]^+$  calcd. for  $\text{C}_{22}\text{H}_{21}\text{NNaO}_6$  418.1261, found 418.1266.

**Isopropyl 3-hydroxy-9a-nitro-1-phenyl-2,3,4,4a,9,9a-hexahydro-1H-3,9-methanoxanthene-4-**

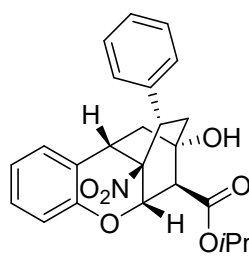

**carboxylate (a 17:1 mixture of diastereomers) (3y).** The product **3y**

was obtained as a white solid (27 mg, 64% yield).  $^1\text{H}$  NMR (400 MHz,  $\text{CDCl}_3$ )  $\delta$  (ppm): 7.40-7.33 (m, 3H), 7.28 (d,  $J = 7.2$  Hz, 2H), 7.12 (t,  $J =$

7.8 Hz, 1H), 7.07 (d,  $J = 7.6$  Hz, 1H), 6.93 (t,  $J = 7.2$  Hz, 1H), 6.83 (d,  $J =$

8.0 Hz, 1H), 5.65 (t,  $J = 3.2$  Hz, 1H), 5.24-5.18 (m, 1H), 3.84 (d,  $J =$

11.6 Hz, 1H), 3.77 (dd,  $J = 12.2, 5.4$  Hz, 1H), 3.27 (br s, 1H), 2.95 (s, 1H), 2.80 (t,  $J = 12.4$  Hz, 1H), 2.57 (td,  $J = 13.2, 3.2$  Hz, 1H), 2.02 (dd,  $J = 15.2, 4.8$  Hz, 1H), 1.96 (d,  $J = 13.2$  Hz, 1H), 1.38 (d,  $J = 6.4$  Hz, 3H), 1.35 (d,  $J = 6.4$  Hz, 3H);  $^{13}\text{C}$  NMR (100 MHz,  $\text{CDCl}_3$ )  $\delta$  (ppm): 171.1, 148.2, 137.0, 129.1, 128.5, 128.4, 128.2, 128.1, 126.4, 122.4, 117.6, 87.0, 75.4, 70.3, 67.9, 55.4, 45.41, 45.36, 37.3, 31.3, 21.78, 21.76; IR (KBr): 3472, 2939, 1727, 1555, 1463, 1382, 1215, 1033, 814, 762  $\text{cm}^{-1}$ ; HRMS (ESI)  $m/z$ :  $[\text{M}+\text{Na}]^+$  calcd. for  $\text{C}_{24}\text{H}_{25}\text{NNaO}_6$  446.1574, found 446.1579.

**Tert-butyl 3-hydroxy-9a-nitro-1-phenyl-2,3,4,4a,9,9a-hexahydro-1H-3,9-methanoxanthene-4-**

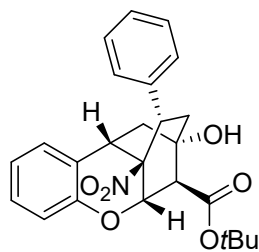

**carboxylate (3z).** The product **3z** was obtained as a white solid (24.2 mg, 55% yield). <sup>1</sup>H NMR (400 MHz, CDCl<sub>3</sub>) δ (ppm): 7.38-7.31 (m, 3H), 7.26 (d, *J* = 7.2 Hz, 2H), 7.10 (t, *J* = 7.4 Hz, 1H), 7.05 (d, *J* = 7.2 Hz, 1H), 6.91 (t, *J* = 7.0 Hz, 1H), 6.81 (d, *J* = 8.0 Hz, 1H), 5.63 (s, 1H), 3.81 (d, *J* = 11.2 Hz, 1H), 3.75 (dd, *J* = 11.6, 4.4 Hz, 1H), 3.34 (br s, 1H), 2.88 (s, 1H), 2.78 (t, *J* = 12.4 Hz, 1H), 2.54 (t, *J* = 12.4 Hz, 1H), 2.00 (d, *J* = 13.2 Hz, 1H), 1.93 (d, *J* = 12.8 Hz, 1H), 1.57 (s, 9H); <sup>13</sup>C NMR (100 MHz, CDCl<sub>3</sub>) δ (ppm): 170.7, 148.3, 137.0, 129.1, 128.5, 128.4, 128.23, 128.17, 126.5, 122.4, 117.5, 87.0, 83.8, 75.5, 67.9, 56.0, 45.5, 45.4, 37.5, 31.3, 28.1; IR (KBr): 3549, 2977, 1708, 1553, 1463, 1384, 1234, 1033, 831, 767 cm<sup>-1</sup>; HRMS (ESI) *m/z*: [M+Na]<sup>+</sup> calcd. for C<sub>25</sub>H<sub>27</sub>NNaO<sub>6</sub> 460.1731, found 460.1735.

**Benzyl 3-hydroxy-9a-nitro-1-phenyl-2,3,4,4a,9,9a-hexahydro-1H-3,9-methanoxanthene-4-**

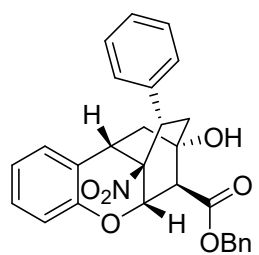

**car-boxylate (3aa).** The product **3aa** was obtained as a white solid (32 mg, 68% yield). <sup>1</sup>H NMR (400 MHz, DMSO-d<sub>6</sub>) δ (ppm): 7.45 (d, *J* = 6.8 Hz, 2H), 7.40-7.32 (m, 8H), 7.25 (d, *J* = 7.2 Hz, 1H), 7.13 (t, *J* = 7.4 Hz, 1H), 6.97 (t, *J* = 7.4 Hz, 1H), 6.83 (d, *J* = 8.0 Hz, 1H), 5.53 (br s, 1H), 5.42 (s, 1H), 5.31-5.24 (m, 2H), 3.90 (d, *J* = 11.2 Hz, 1H), 3.80 (dd, *J* = 11.6, 4.8 Hz, 1H), 2.96 (s, 1H), 2.85 (t, *J* = 12.2 Hz, 1H), 2.68 (t, *J* = 12.0 Hz, 1H), 1.92-1.84 (m, 2H); <sup>13</sup>C NMR (100 MHz, DMSO-d<sub>6</sub>) δ (ppm): 171.6, 147.9, 137.6, 135.7, 128.94, 128.85, 128.5, 128.4, 128.3, 128.1, 128.00, 128.97, 127.3, 122.5, 116.9, 87.3, 76.1, 67.5, 66.7, 56.3, 45.6, 45.3, 36.6, 31.3; IR (KBr): 3632, 3518, 3348, 3034, 2961, 1719, 1551, 1459, 1351, 1213, 1033, 844, 743 cm<sup>-1</sup>; HRMS (ESI) *m/z*: [M+Na]<sup>+</sup> calcd. for C<sub>28</sub>H<sub>25</sub>NNaO<sub>6</sub> 494.1574, found 494.1578.

#### 4. Reduction of ester group of 3a

**4-(hydroxymethyl)-9a-nitro-1-phenyl-1,2,4,4a,9,9a-hexahydro-3H-3,9-methanoxanthene-3-ol**

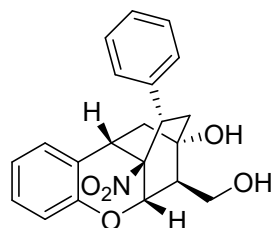

**(a 12:1 mixture of diastereomers) (4).** Lithium triethylborohydride (0.01 mmol, 1M in THF) was added dropwise to a solution of **3a** (41 mg, 0.1 mmol) and lithium borohydride (0.1 mmol, 2M in THF) in THF (1 mL). The solution was then stirred at rt for 1 h until the



completion of reaction, as monitored by TLC. The reaction mixture was diluted with THF (1 mL), washed with aqueous NaOH (3M; 2 x 3 mL), brine and water (2 x 3 mL). The organic phase was dried over Na<sub>2</sub>SO<sub>4</sub> and concentrated under reduced pressure. The residue was purified by flash column chromatography on silica gel, eluting with (Petroleum ether/Ethyl acetate = 2/1, v/v) to give **4** as a pale yellow oil (36.4 mg, 99% yield, 12:1 dr).

<sup>1</sup>H NMR (400 MHz, DMSO-d<sub>6</sub>)  $\delta$  (ppm): 7.39-7.36 (m, 2H), 7.32-7.29 (m, 3H), 7.18 (d,  $J$  = 7.6 Hz, 1H), 7.09 (t,  $J$  = 7.2 Hz, 1H), 6.90 (t,  $J$  = 7.4 Hz, 1H), 6.77 (d,  $J$  = 8.0 Hz, 1H), 5.21 (t,  $J$  = 3.2 Hz, 1H), 5.03 (t,  $J$  = 4.8 Hz, 1H), 4.98 (br s, 1H), 3.86-3.82 (m, 3H), 3.71 (dd,  $J$  = 12.0, 5.6 Hz, 1H), 2.73 (t,  $J$  = 12.2 Hz, 1H), 2.59 (td,  $J$  = 12.6, 3.0 Hz, 1H), 1.84 (d,  $J$  = 3.2 Hz, 1H), 1.73-1.67 (m, 2H); <sup>13</sup>C NMR (100 MHz, DMSO-d<sub>6</sub>)  $\delta$  (ppm): 148.6, 138.3, 128.8, 128.6, 128.5, 127.91, 127.87, 127.8, 121.7, 116.8, 88.1, 76.7, 66.4, 59.1, 51.7, 47.2, 45.5, 37.8, 31.5; IR (KBr): 3572, 3336, 2963, 1553, 1462, 1363, 1225, 1017, 809, 766 cm<sup>-1</sup>; HRMS (ESI)  $m/z$ : [M+H]<sup>+</sup> calcd. for C<sub>21</sub>H<sub>22</sub>NO<sub>5</sub> 368.1492, found 368.1489.

## 5. Reduction of **3a** to primary amine **5**

### Ethyl 9a-amino-3-hydroxy-1-phenyl-2,3,4,4a,9,9a-hexahydro-1*H*-3,9-methanoxanthene-4-

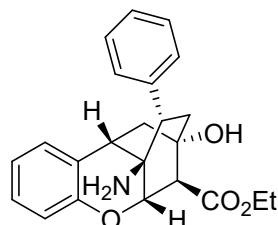

car-boxylate (a 15:1 mixture of diastereomers) (**5**). Zinc dust (260 mg, 4 mmol) was added portionwise to a solution of **3a** (41 mg, 0.1 mmol) and concentrated HCl (150  $\mu$ L, 1.2 mmol) in ethanol (1 mL) at 0 °C. The suspension was stirred at 0 °C for 30 min. After completion

of the reaction, a saturated aqueous NaHCO<sub>3</sub> solution was added dropwise to around pH 9. The resulting mixture was filtered through a pad of Celite, and the filter cake was rinsed with EtOAc. Subsequently, the filtrate was dried over Na<sub>2</sub>SO<sub>4</sub>, filtered, and concentrated in vacuum to give pure primary amine **5** (37.6 mg, 99% yield, 15:1 dr).

<sup>1</sup>H NMR (400 MHz, CDCl<sub>3</sub>)  $\delta$  (ppm): 7.43-7.37 (m, 4H), 7.30 (t,  $J$  = 6.6 Hz, 1H), 7.13 (t,  $J$  = 7.6 Hz, 1H), 6.98 (d,  $J$  = 7.2 Hz, 1H), 6.88 (t,  $J$  = 8.6 Hz, 2H), 4.66 (s, 1H), 4.28 (q,  $J$  = 7.0 Hz, 2H), 3.12 (dd,  $J$  = 11.8, 5.4 Hz, 1H), 2.84 (s, 2H), 2.63 (t,  $J$  = 12.2 Hz, 1H), 2.48 (td,  $J$  = 12.8, 2.4 Hz, 1H), 2.00 (br s, 2H), 1.92 (dd,  $J$  = 13.6, 3.6 Hz, 1H), 1.83 (d,  $J$  = 12.8 Hz, 1H), 1.33 (t,  $J$  = 7.0 Hz, 3H); <sup>13</sup>C NMR (100 MHz, CDCl<sub>3</sub>)  $\delta$  (ppm): 172.7, 149.2, 140.2, 129.8, 129.3, 128.6, 128.1, 127.6, 127.2, 121.7, 117.3, 79.2, 67.3, 61.6, 55.8, 48.3, 46.4, 45.7, 38.3, 37.1, 14.1; IR (KBr): 3450, 2966,

1731, 1596, 1494, 1461, 1340, 1228, 1196, 1023, 758, 704  $\text{cm}^{-1}$ ; HRMS (ESI)  $m/z$ :  $[\text{M}+\text{H}]^+$  calcd. for  $\text{C}_{23}\text{H}_{26}\text{NO}_4$  380.1856, found 380.1855.

## 6. X-ray crystallographic analysis of **3d** (CCDC 2131464)

Single crystals of  $\text{C}_{23}\text{H}_{22}\text{ClNO}_6$  were obtained via slow volatilization in a mixed solution of dichloromethane/petroleum ether. A suitable crystal was selected and measured on a New Gemini Dual-sourced diffractometer (Mo  $K_\alpha$   $\lambda = 0.71073 \text{ \AA}$ ). The crystal was kept at 150 K during data collection. Using Olex2, the structure was solved with the ShelXT structure solution program using Direct Methods and refined with the ShelXL refinement package using Least Squares minimisation. The ellipsoid contour percent probability level of **3d** is 50%.

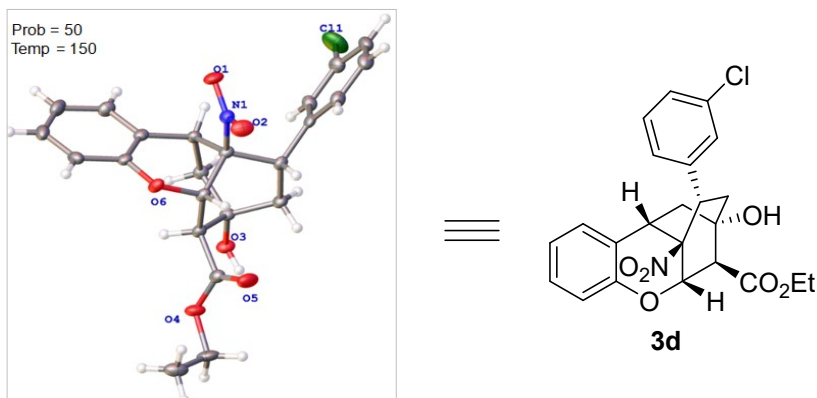

|                        |                                           |
|------------------------|-------------------------------------------|
| Empirical formula      | $\text{C}_{23}\text{H}_{22}\text{ClNO}_6$ |
| Formula weight         | 443.86                                    |
| Temperature/K          | 150.00(10)                                |
| Crystal system         | orthorhombic                              |
| Space group            | Pbca                                      |
| $a/\text{\AA}$         | 14.9980(6)                                |
| $b/\text{\AA}$         | 12.8933(5)                                |
| $c/\text{\AA}$         | 21.1475(11)                               |
| $\alpha/^\circ$        | 90                                        |
| $\beta/^\circ$         | 90                                        |
| $\gamma/^\circ$        | 90                                        |
| Volume/ $\text{\AA}^3$ | 4089.4(3)                                 |

|                                                |                                                               |
|------------------------------------------------|---------------------------------------------------------------|
| Z                                              | 8                                                             |
| $\rho_{\text{calc}}/\text{cm}^3$               | 1.442                                                         |
| $\mu/\text{mm}^{-1}$                           | 0.229                                                         |
| F(000)                                         | 1856.0                                                        |
| Crystal size/ $\text{mm}^3$                    | $0.14 \times 0.13 \times 0.12$                                |
| Radiation                                      | Mo K $\alpha$ ( $\lambda = 0.71073$ )                         |
| 2 $\Theta$ range for data collection/ $^\circ$ | 4.59 to 49.996                                                |
| Index ranges                                   | $-17 \leq h \leq 16, -15 \leq k \leq 15, -25 \leq l \leq 18$  |
| Reflections collected                          | 11972                                                         |
| Independent reflections                        | 3607 [ $R_{\text{int}} = 0.0330, R_{\text{sigma}} = 0.0348$ ] |
| Data/restraints/parameters                     | 3607/0/282                                                    |
| Goodness-of-fit on $F^2$                       | 1.057                                                         |
| Final R indexes [ $I \geq 2\sigma(I)$ ]        | $R_1 = 0.0389, wR_2 = 0.0830$                                 |
| Final R indexes [all data]                     | $R_1 = 0.0502, wR_2 = 0.0903$                                 |
| Largest diff. peak/hole / $e \text{ \AA}^{-3}$ | 0.27/-0.30                                                    |

## 7. Reference

1. L. Chen, T. Guo, R. Xia, X. Tang, Y. Chen, C. Zhang and W. Xue, *Molecules*, 2019, **24**, 925.

## 8. NMR spectra of products

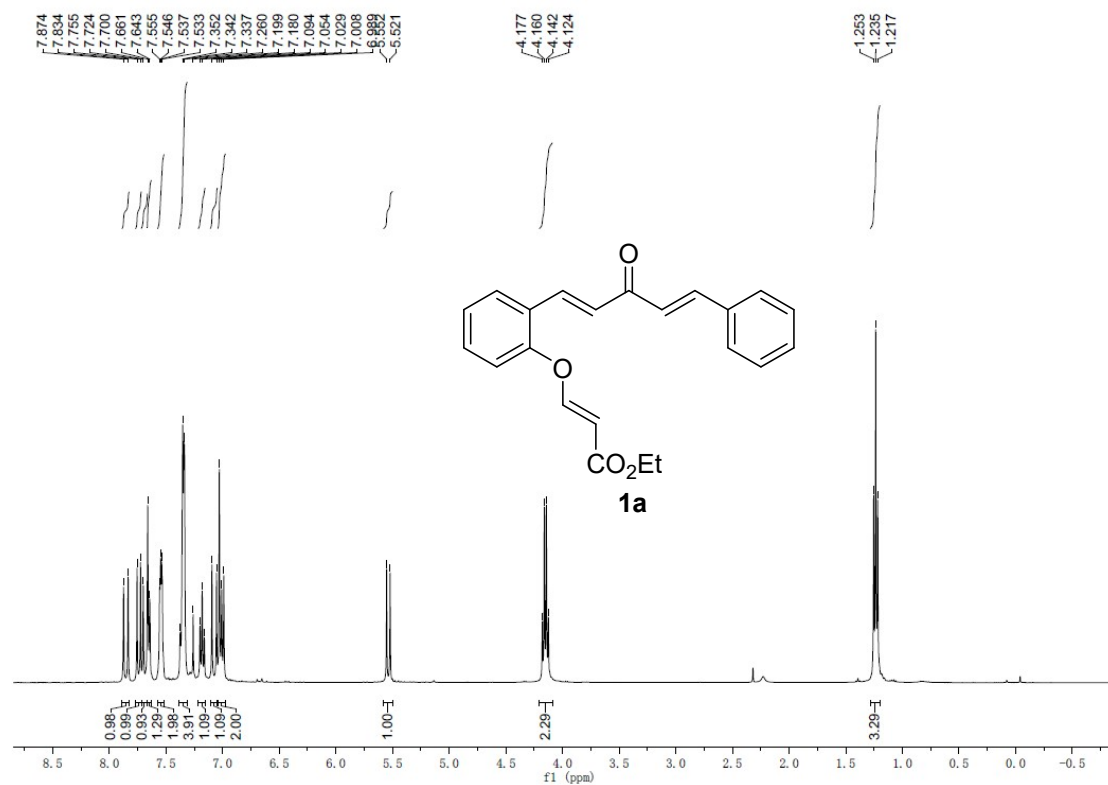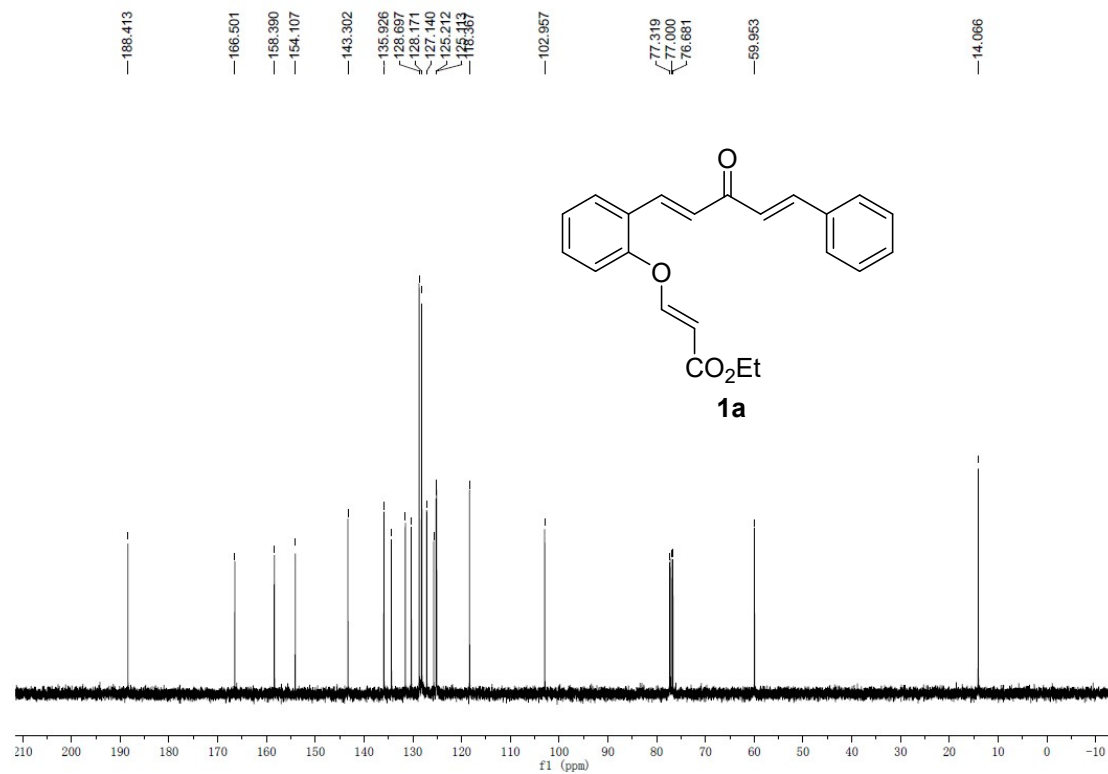

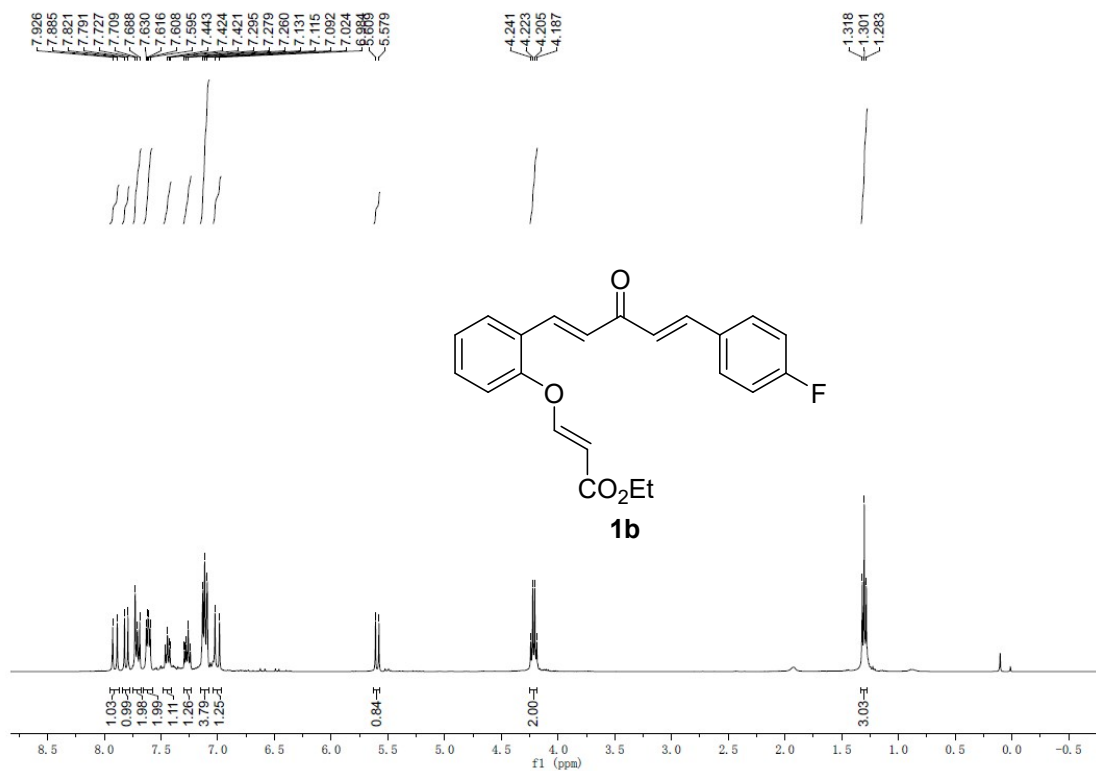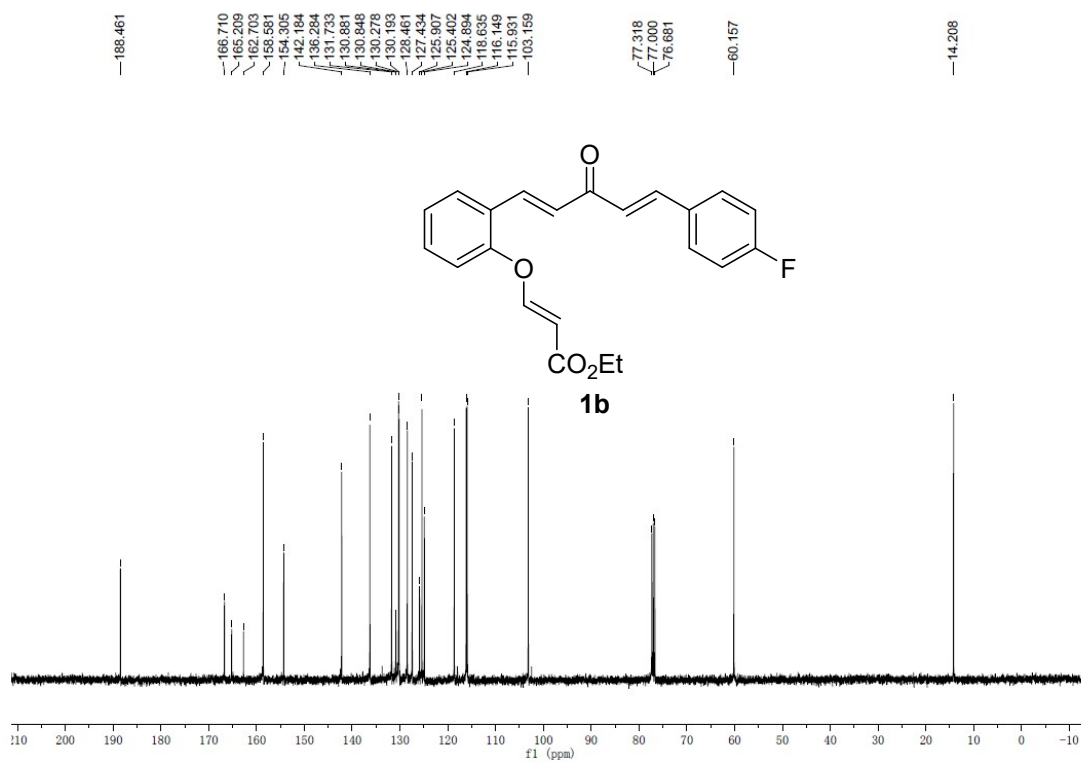

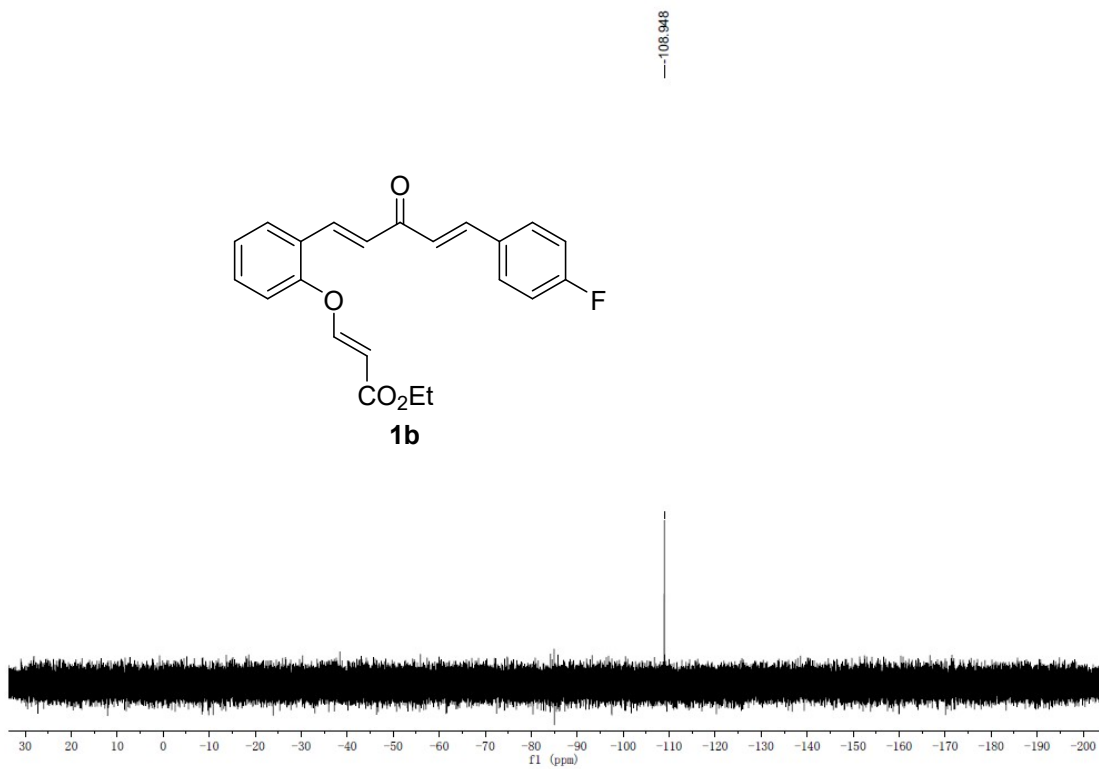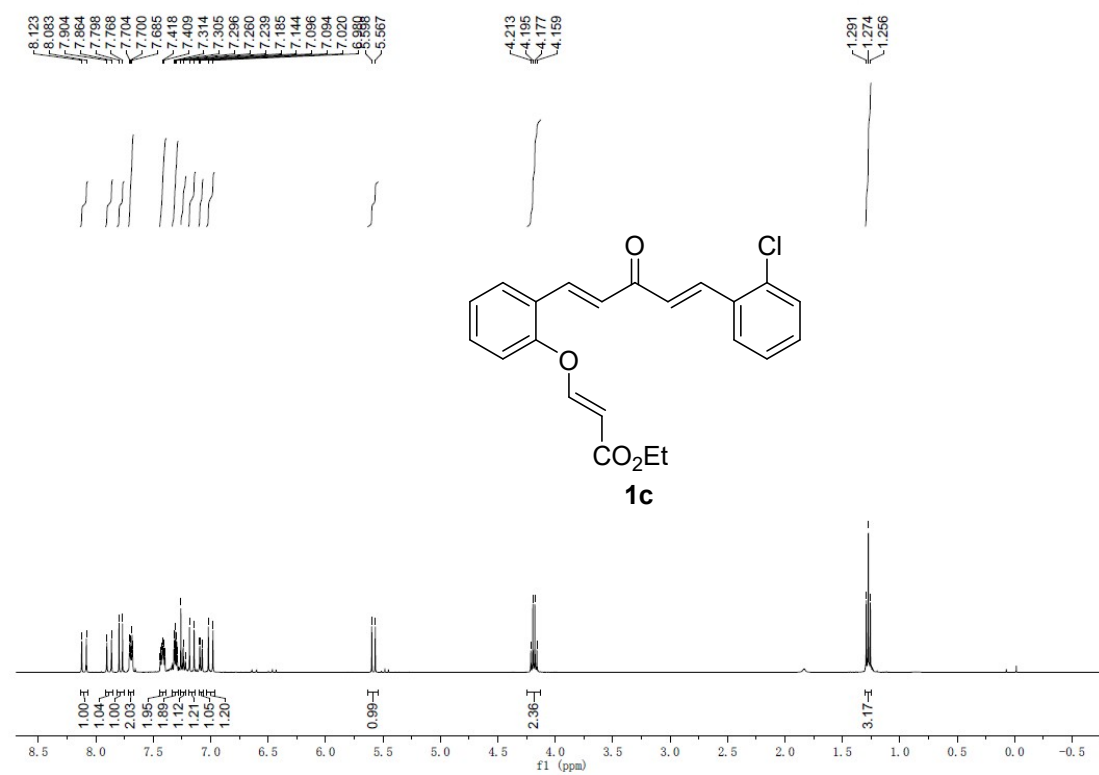

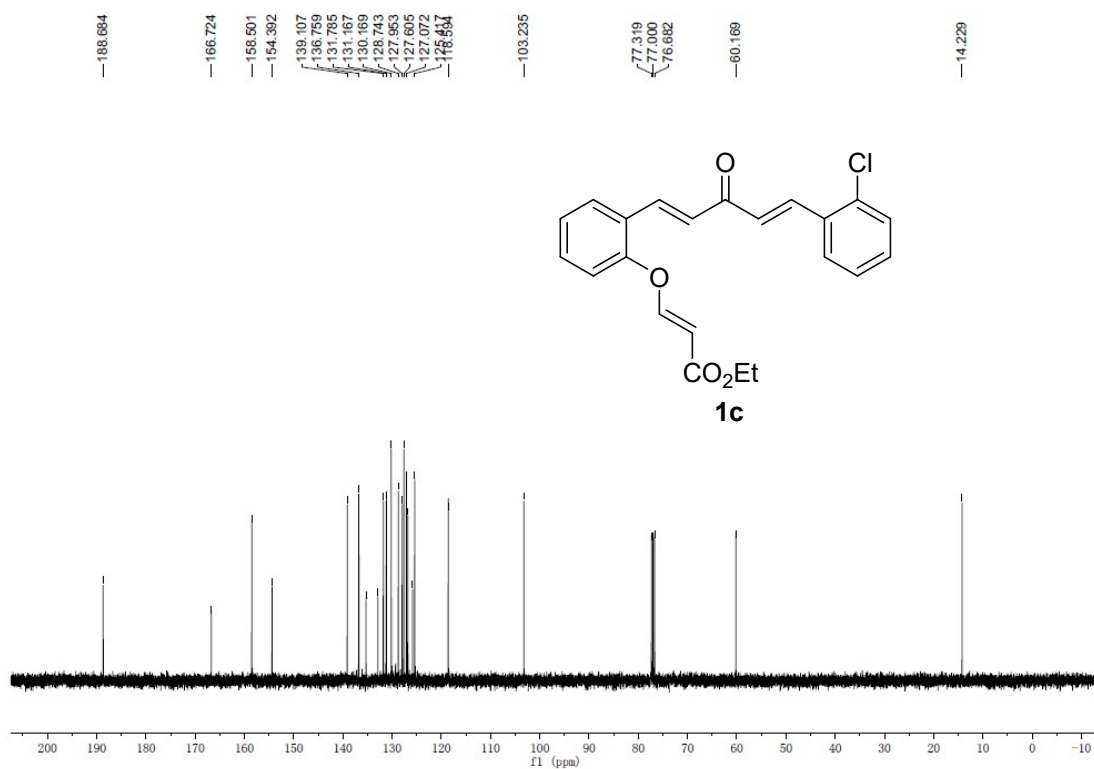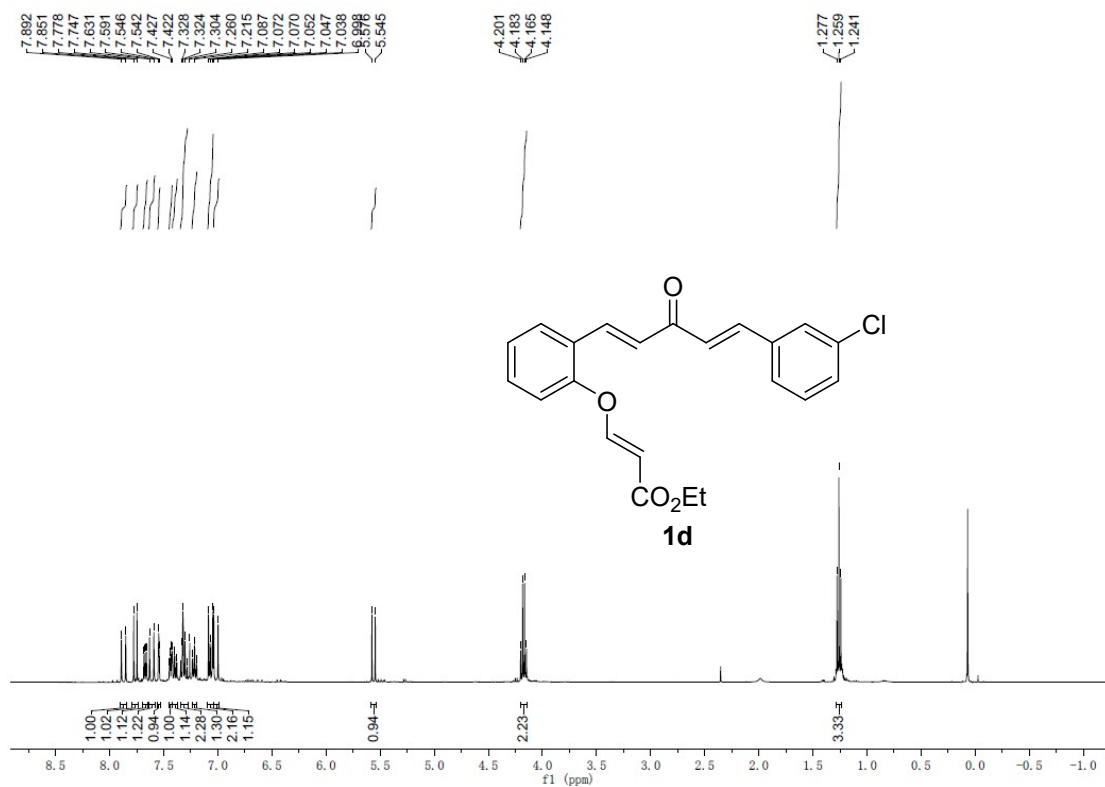

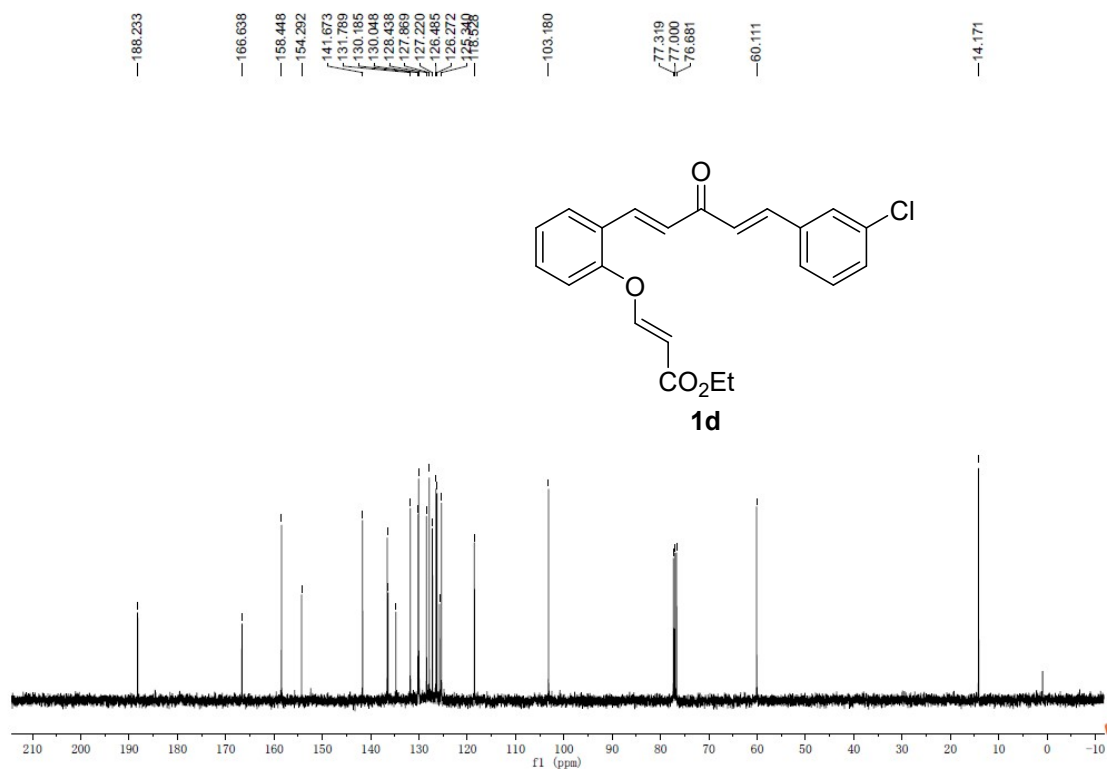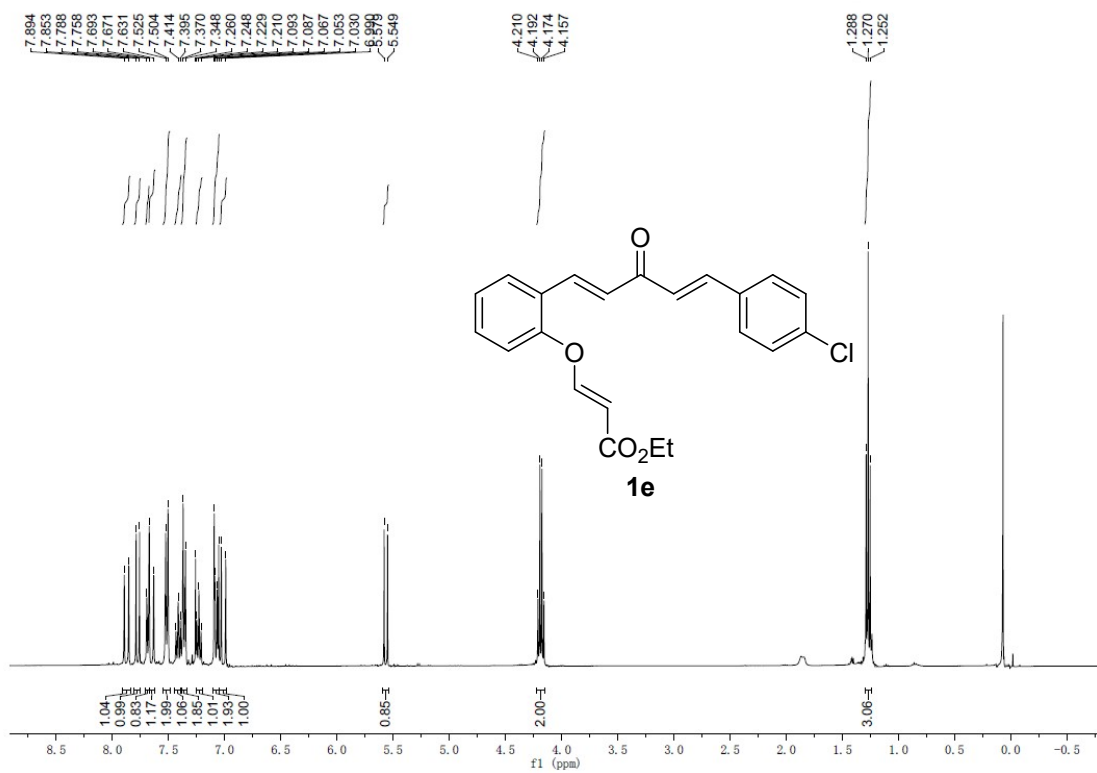



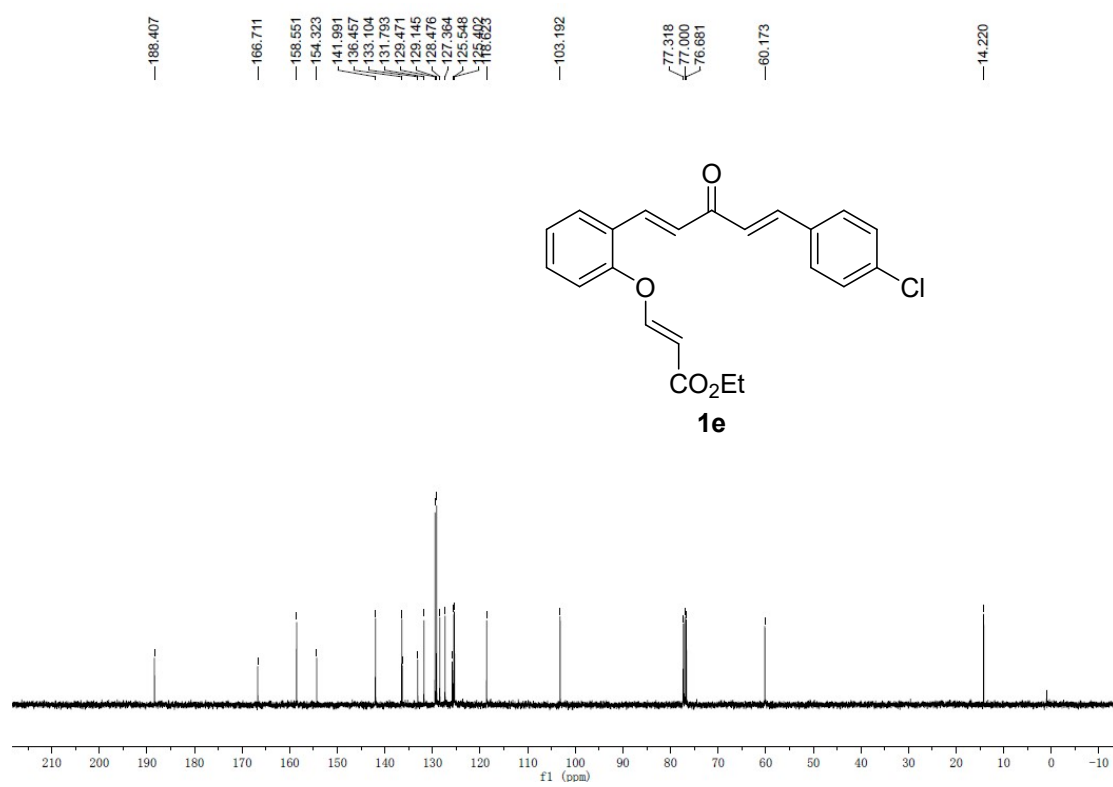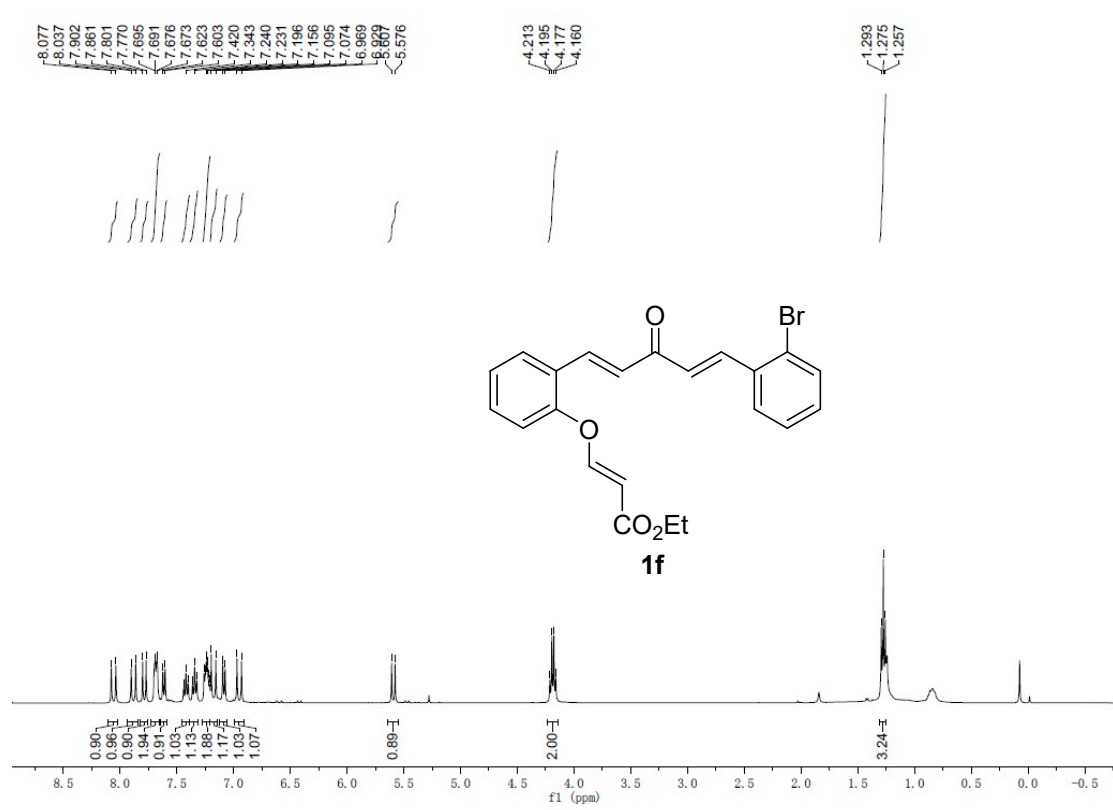

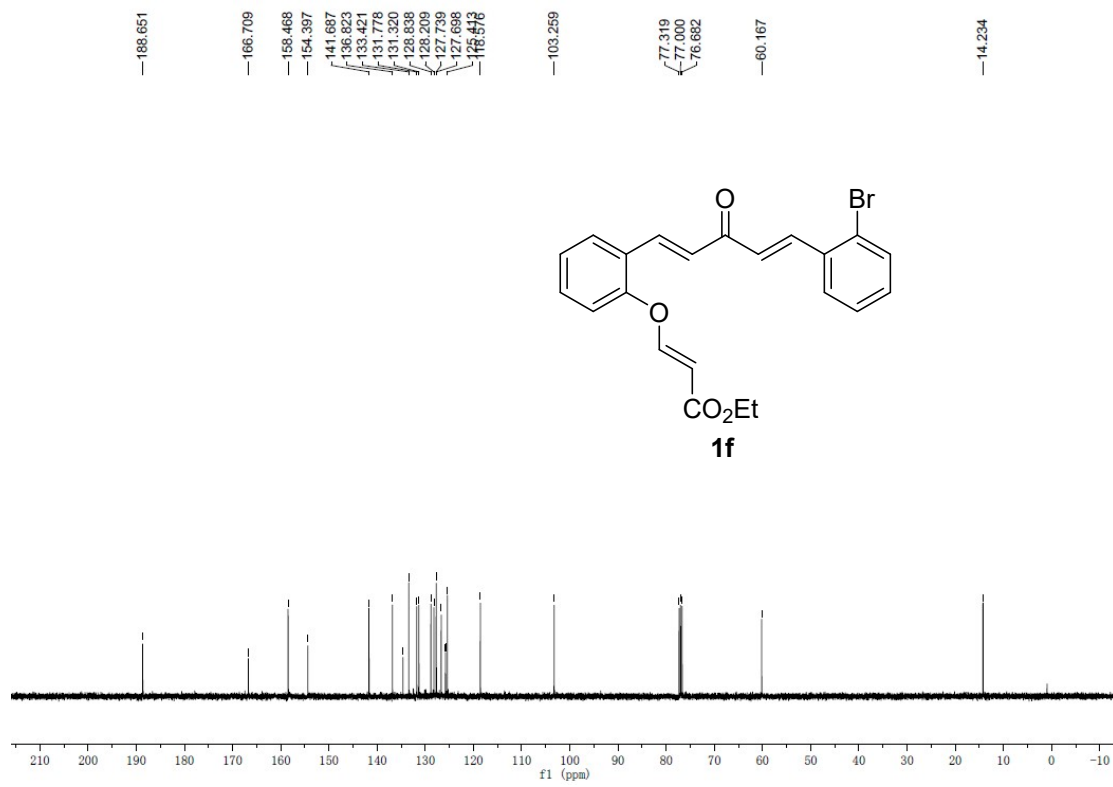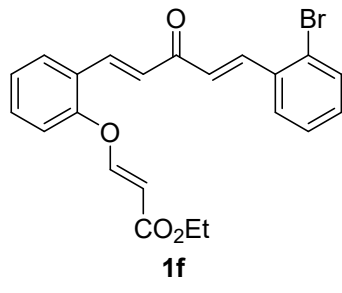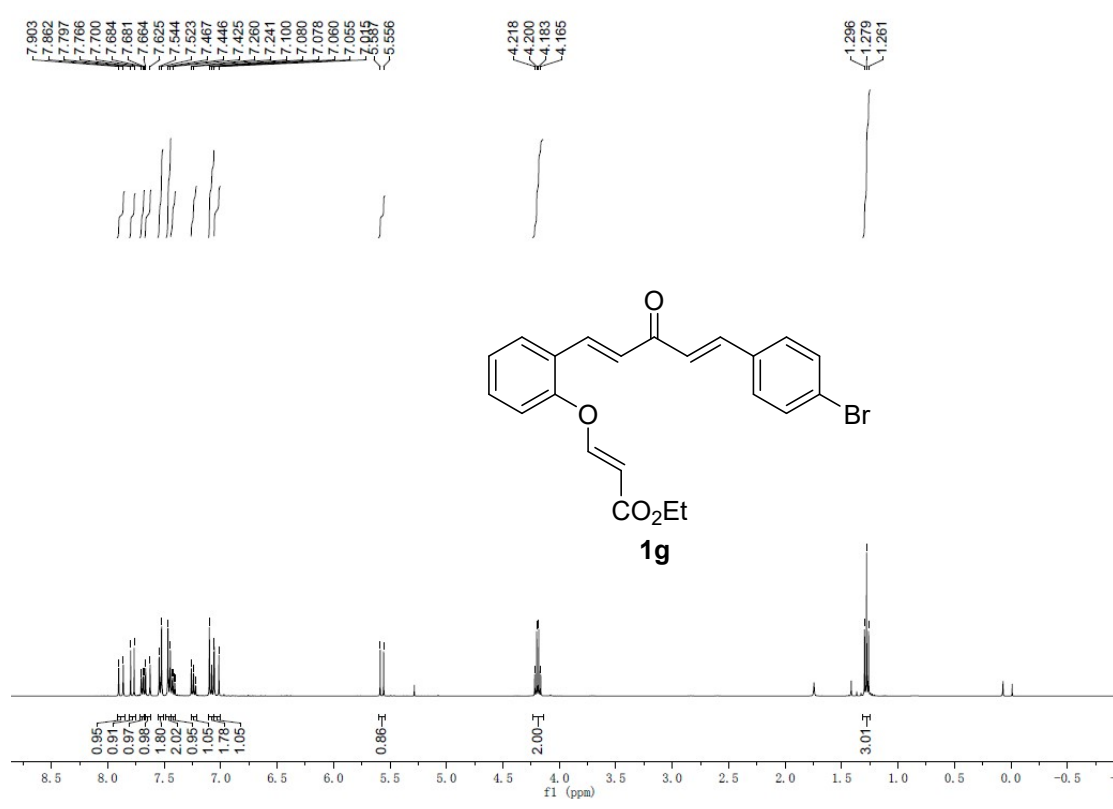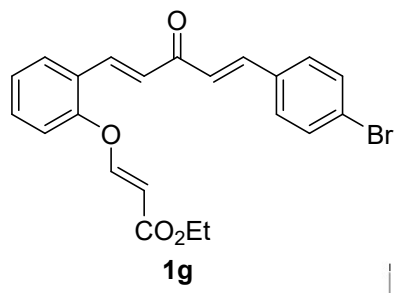

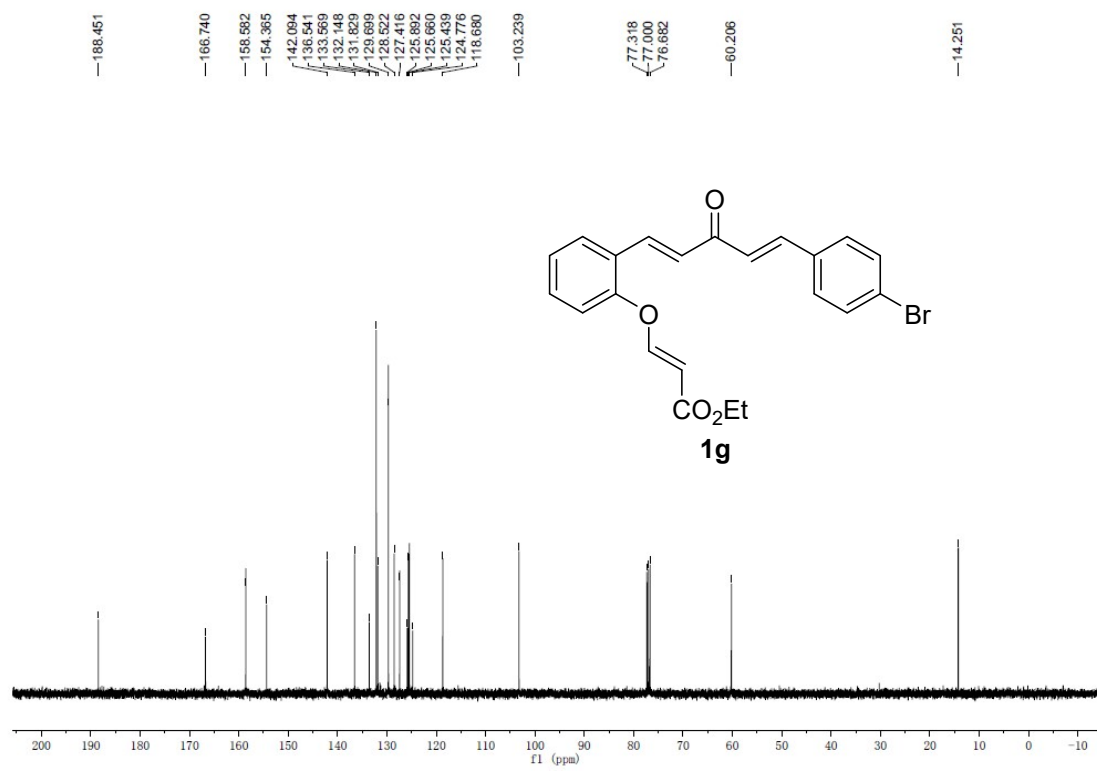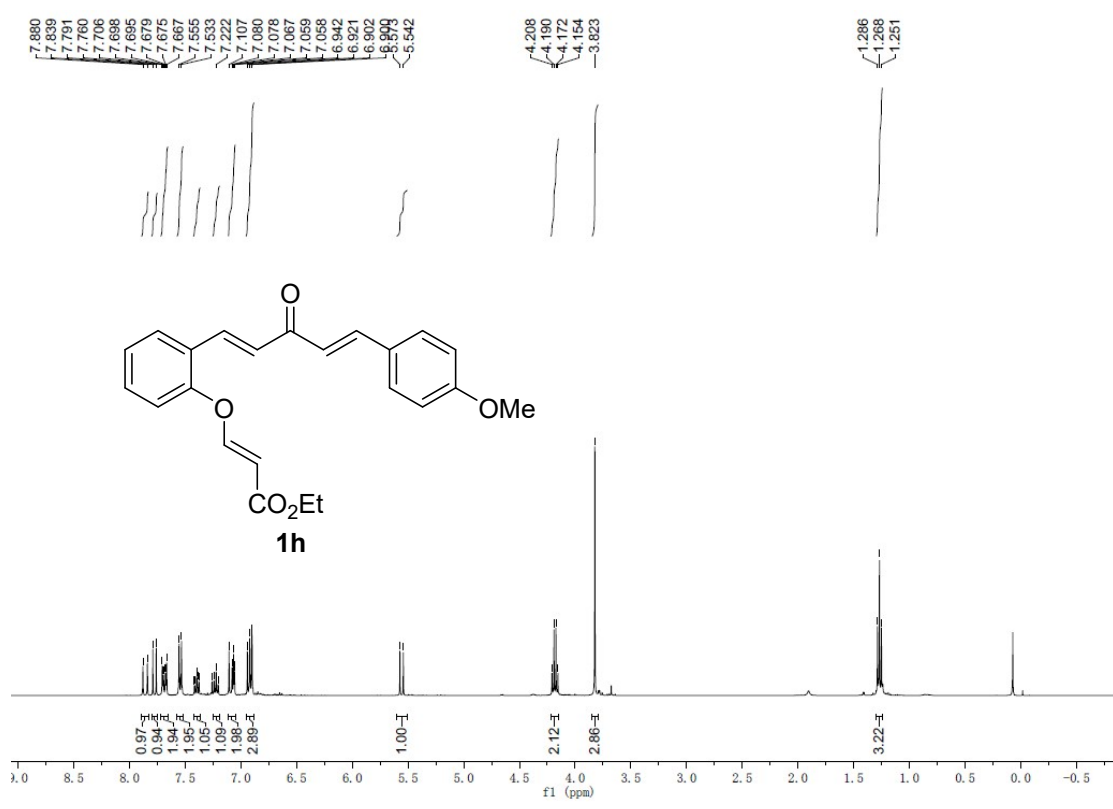

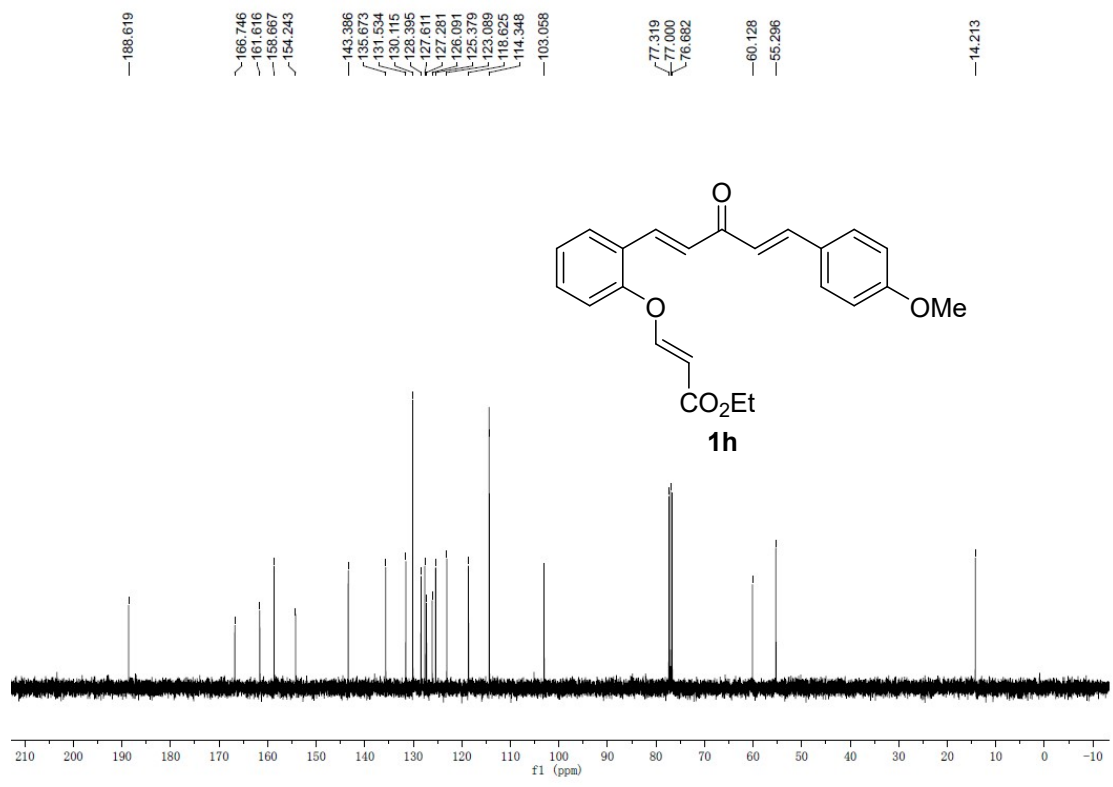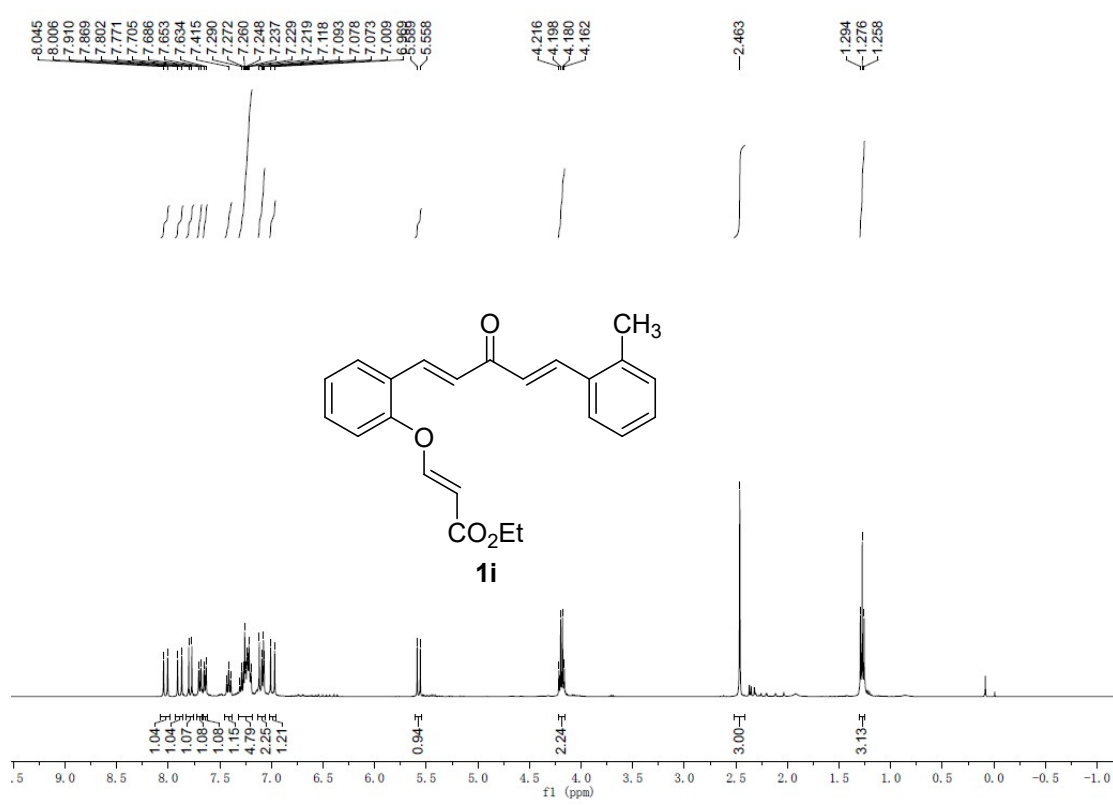

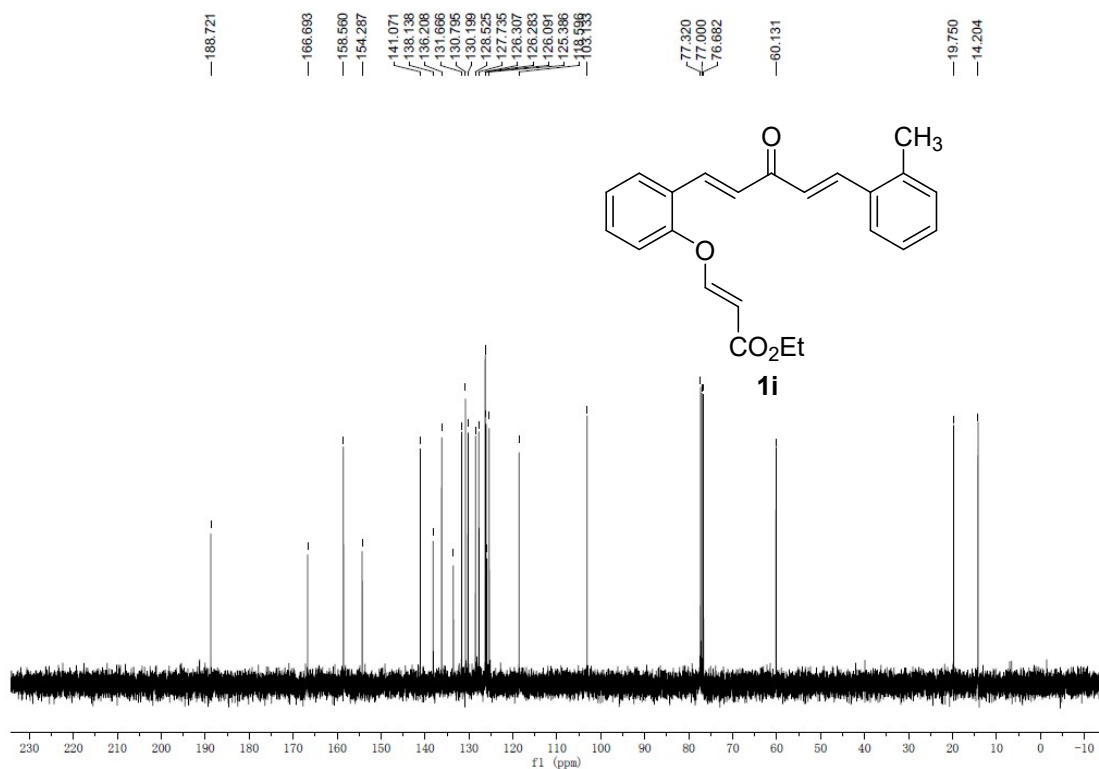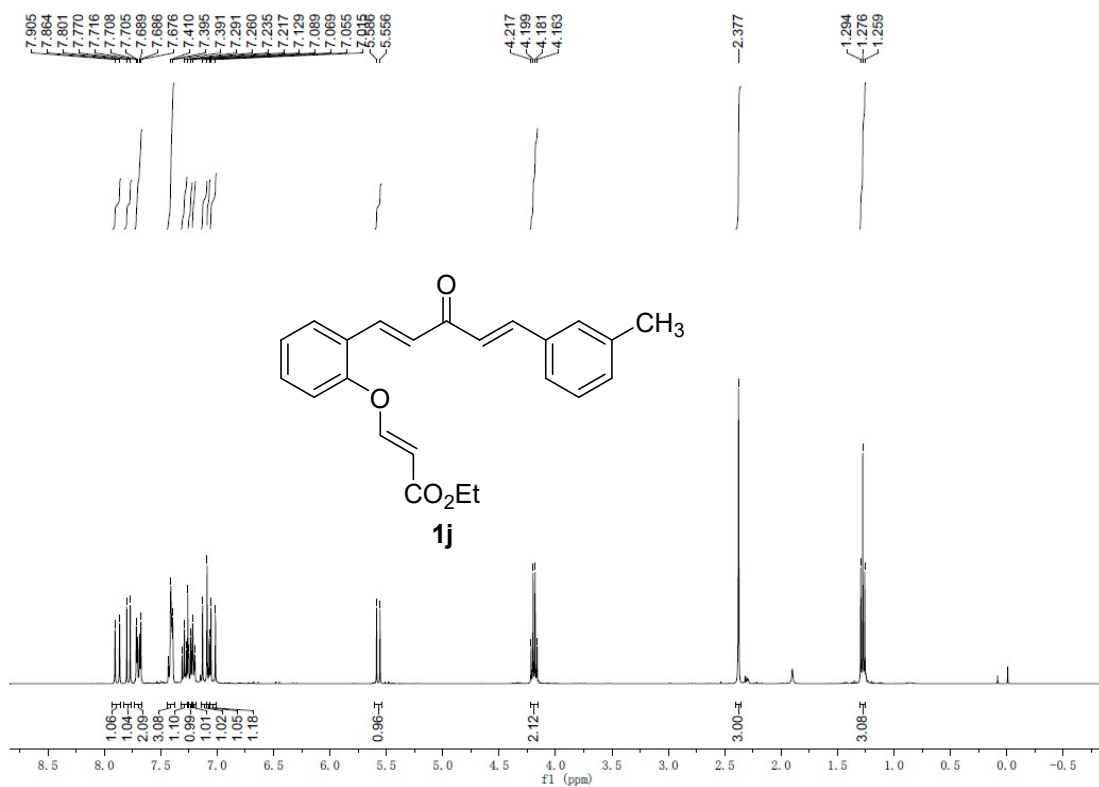

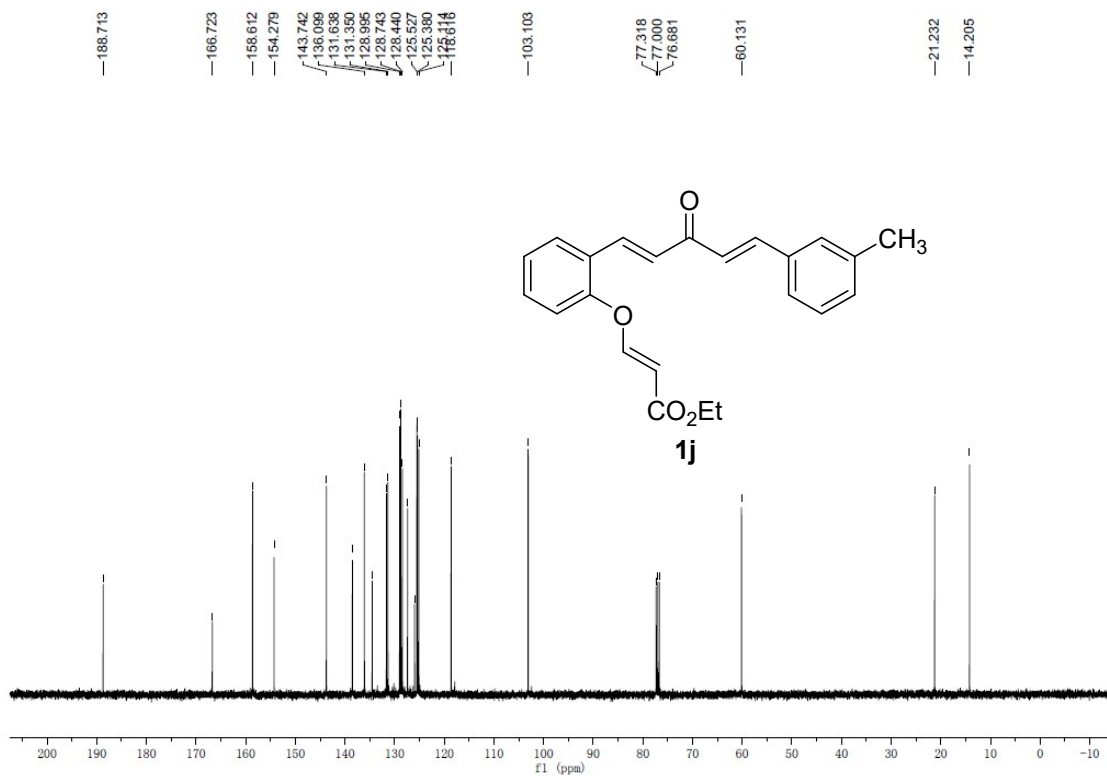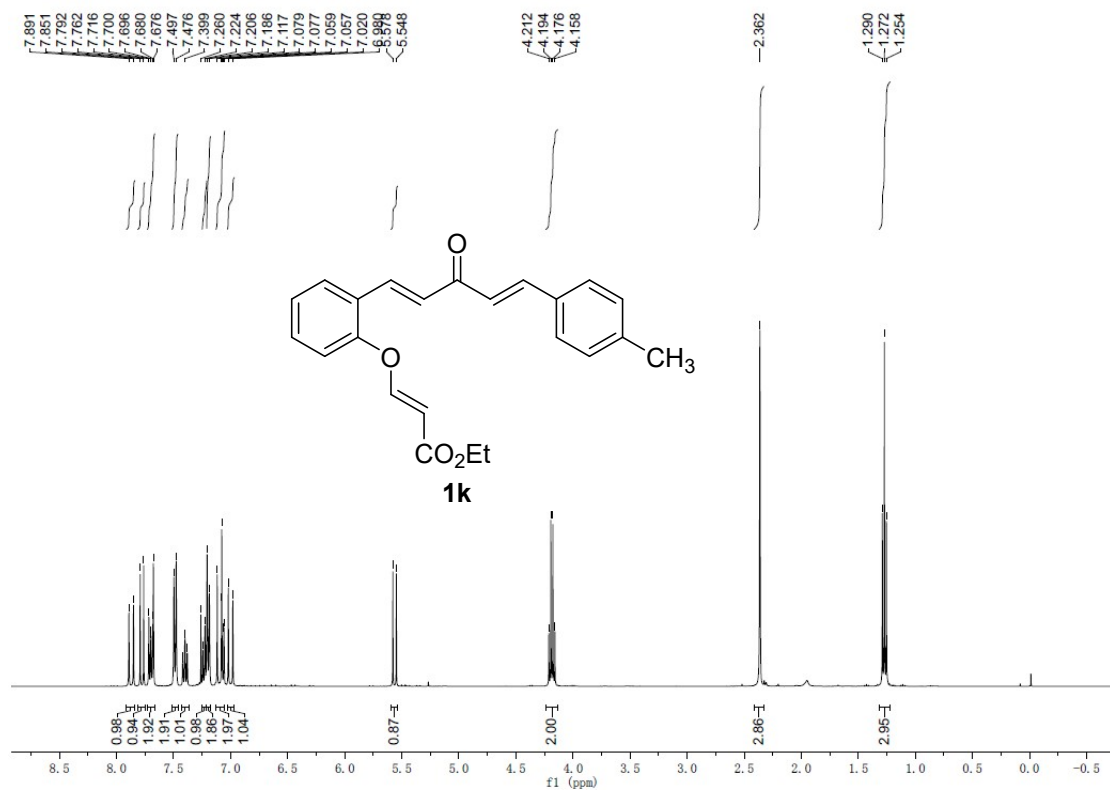

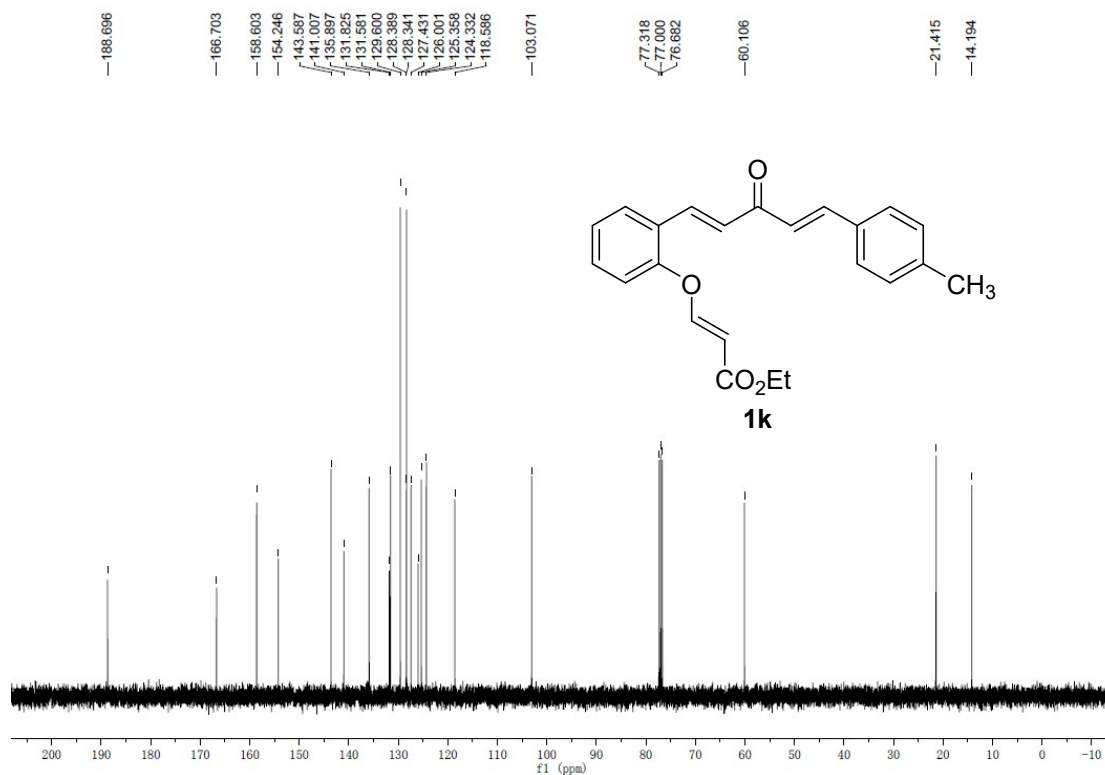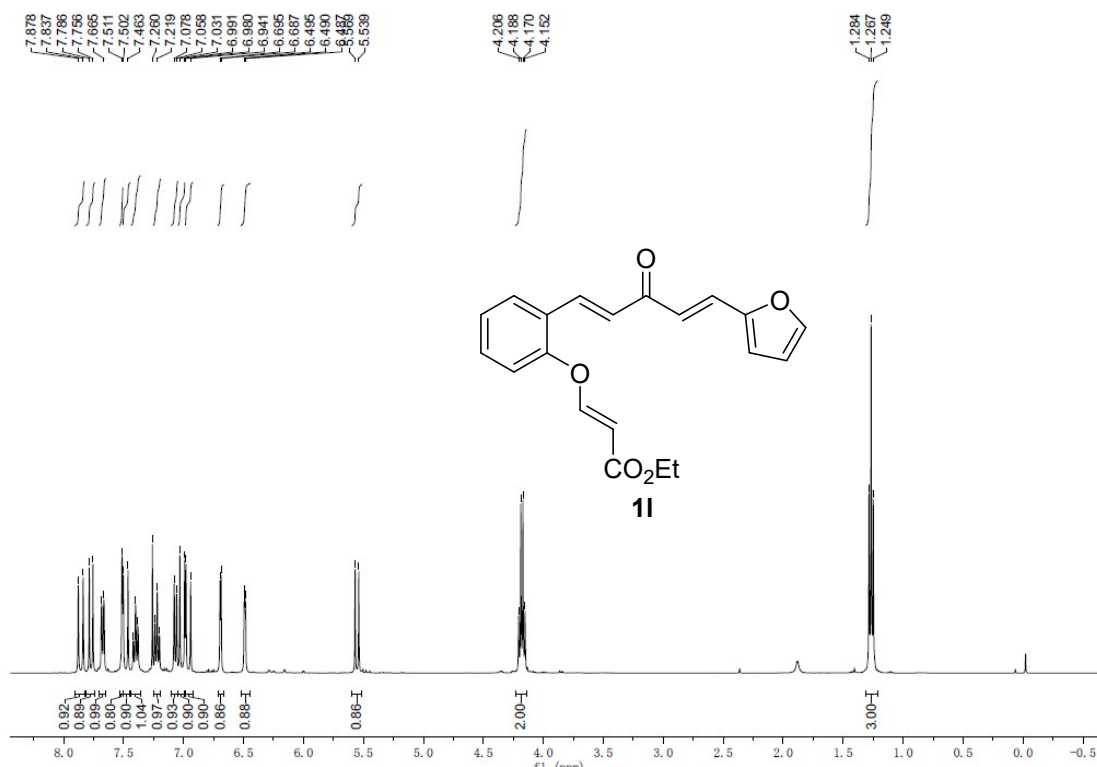

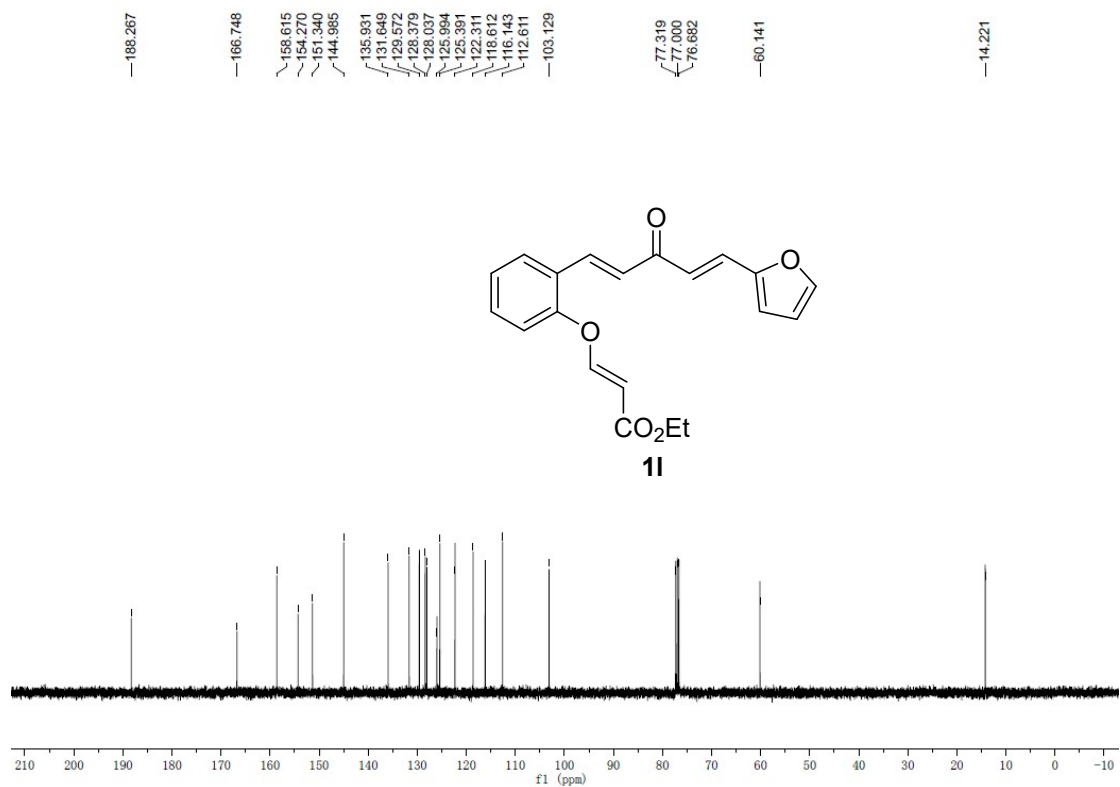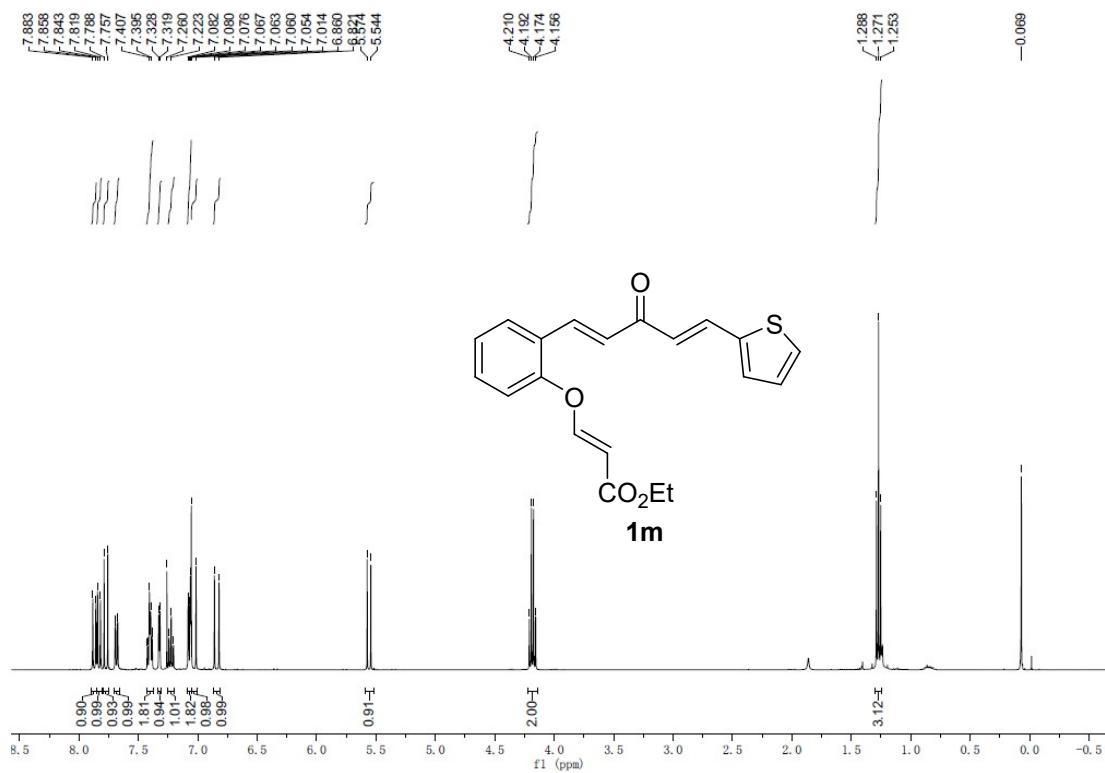



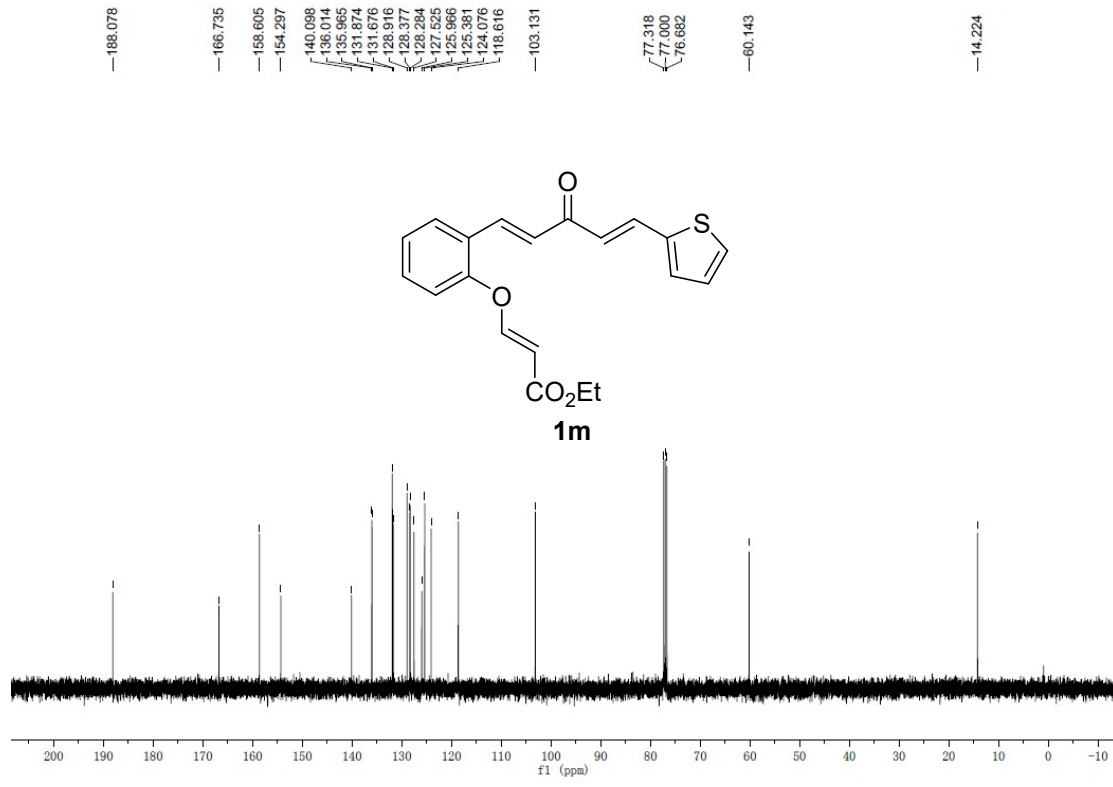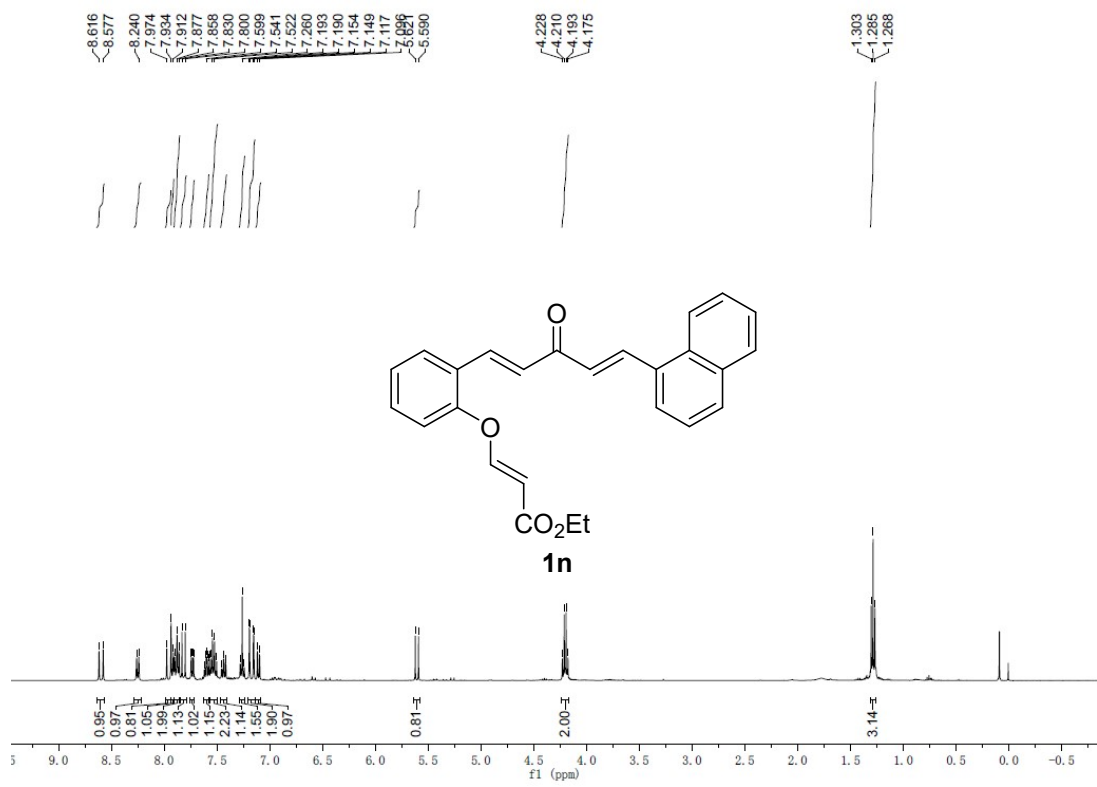

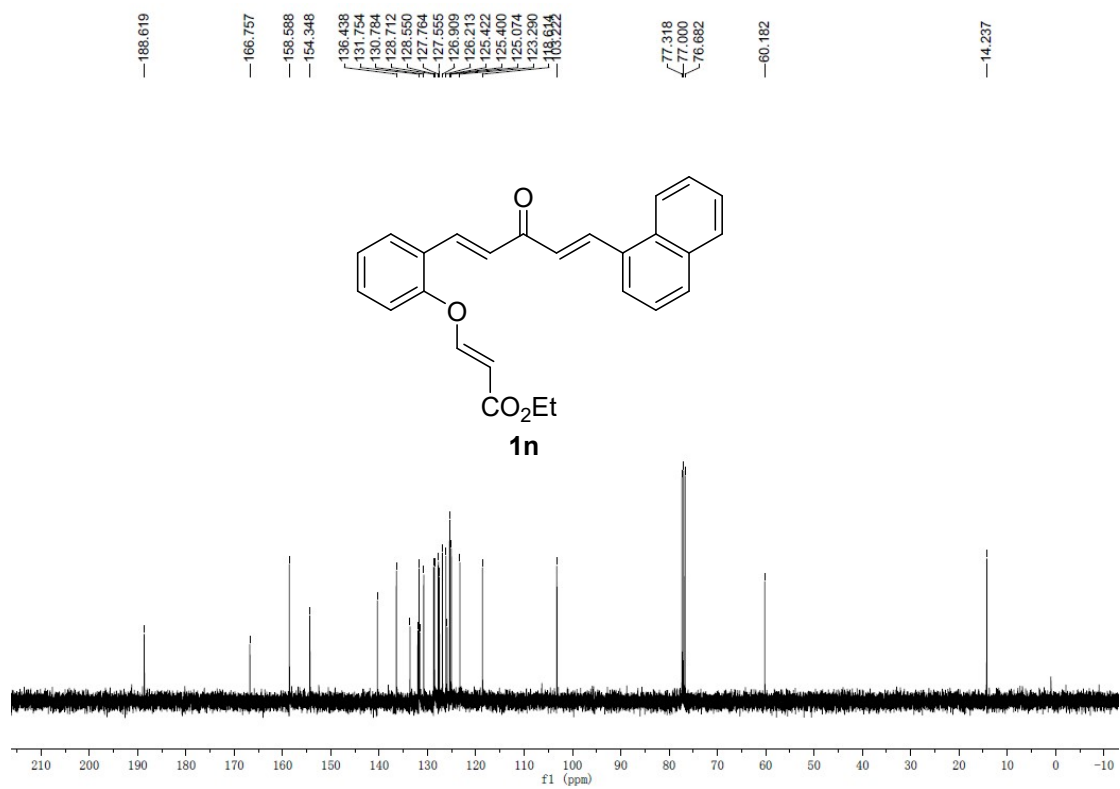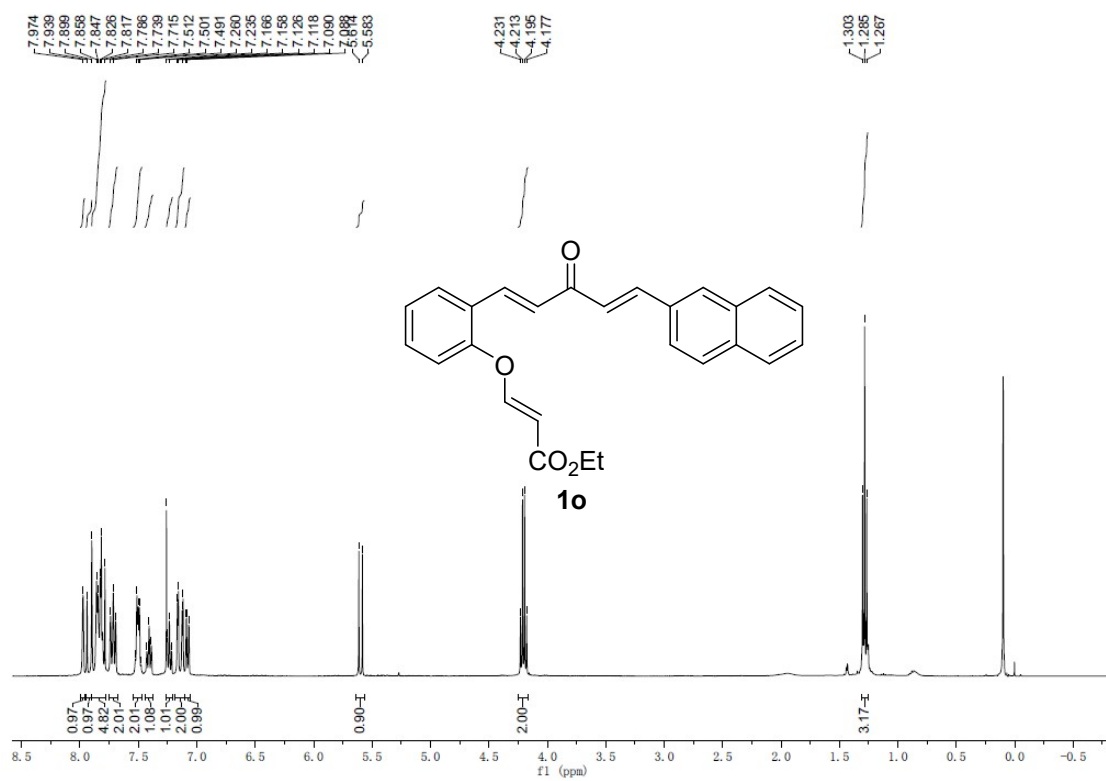

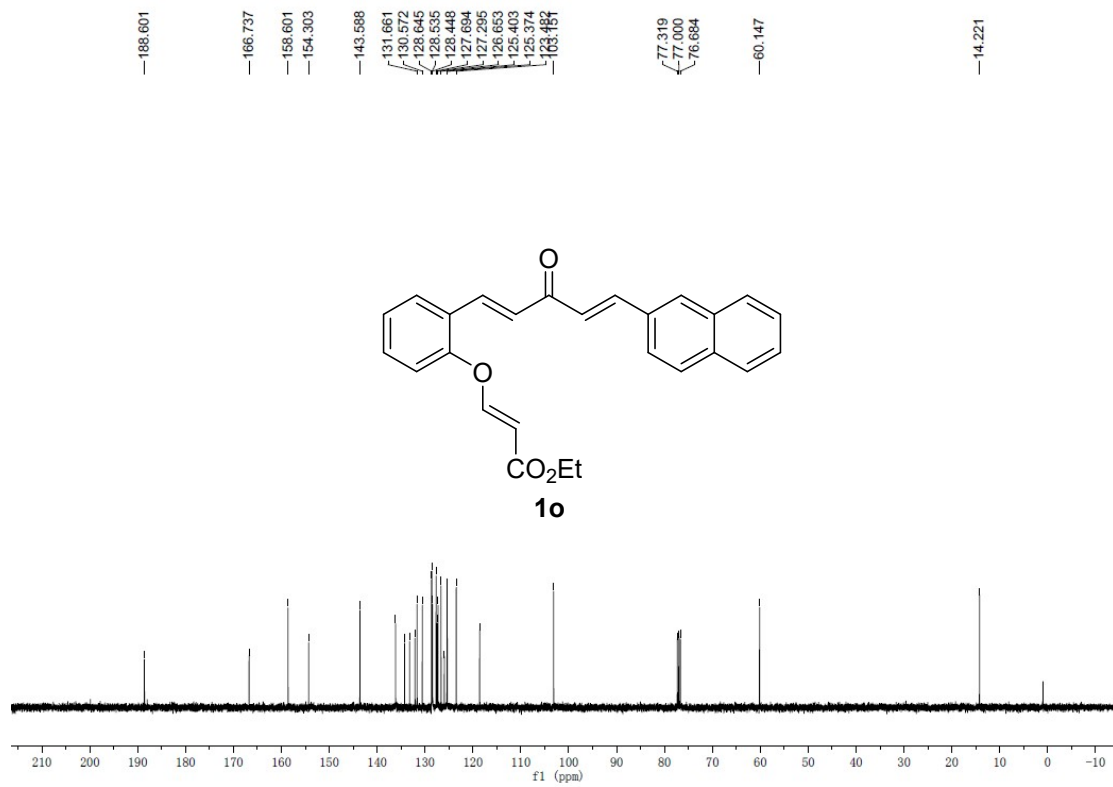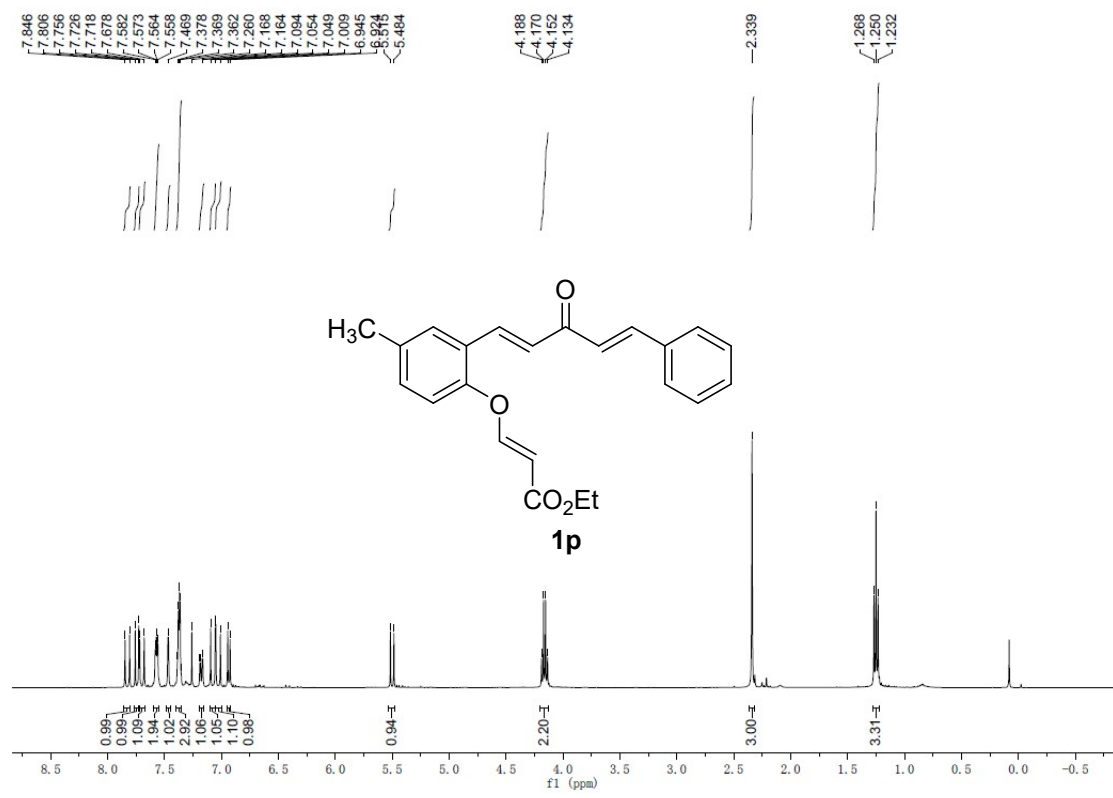

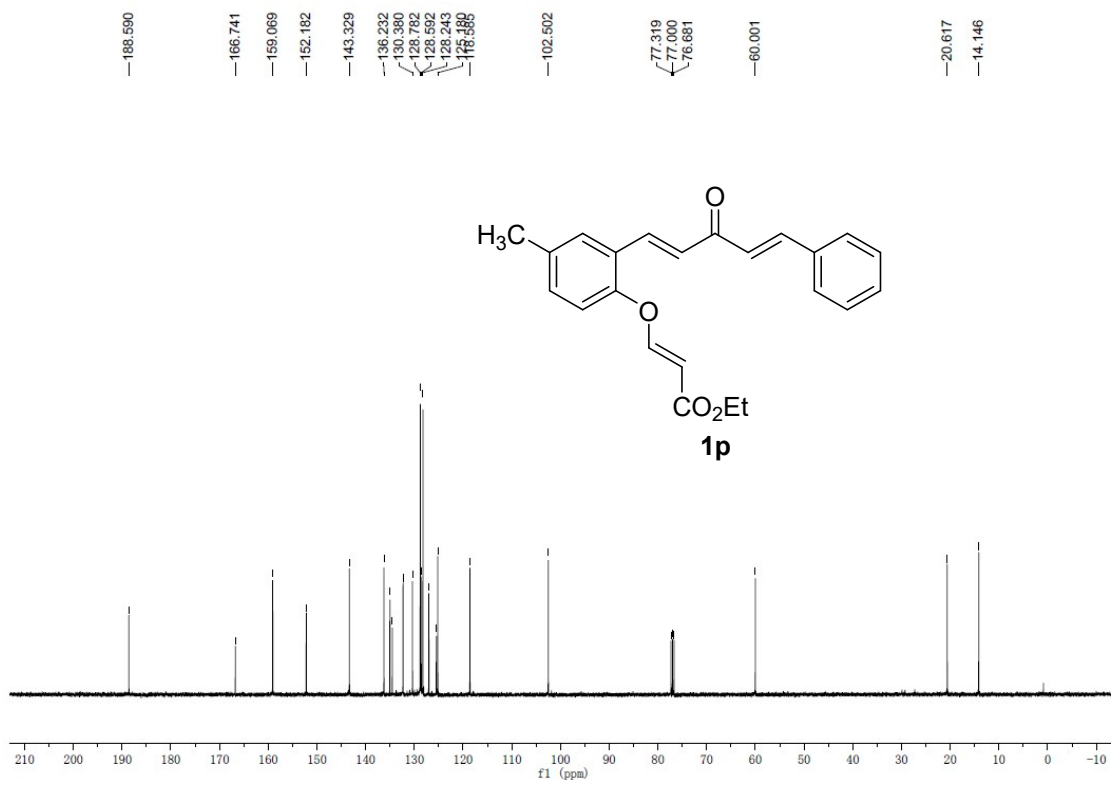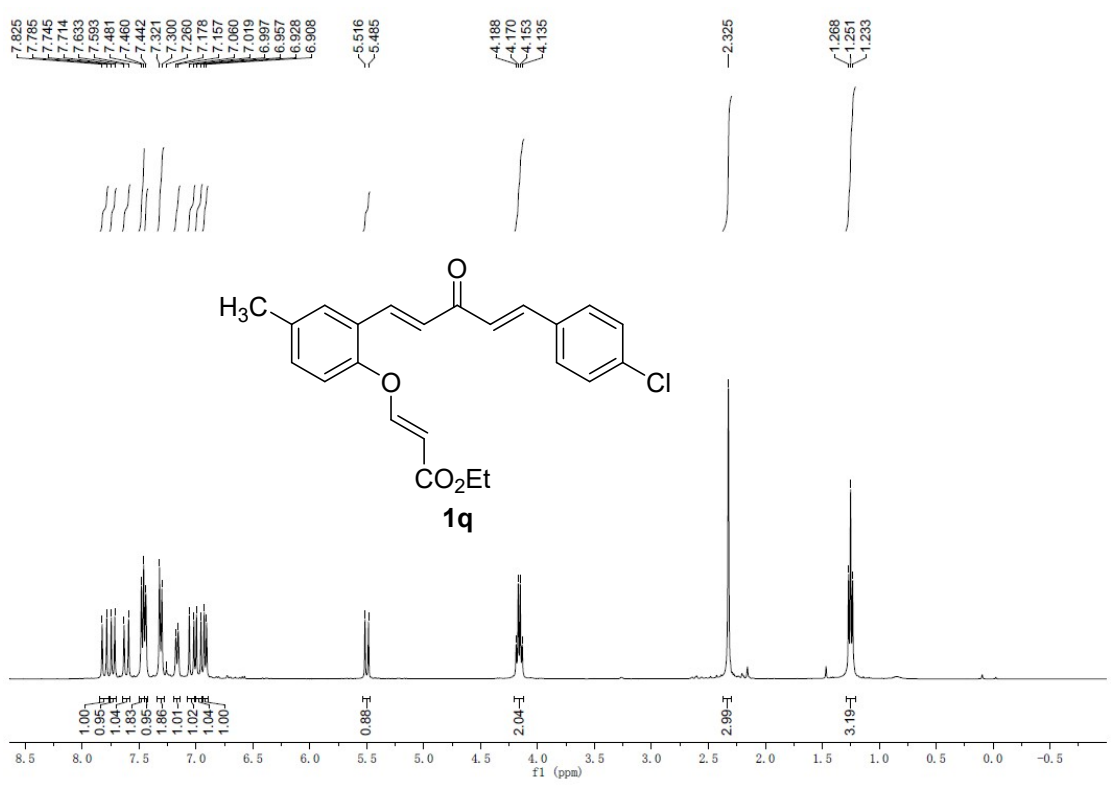

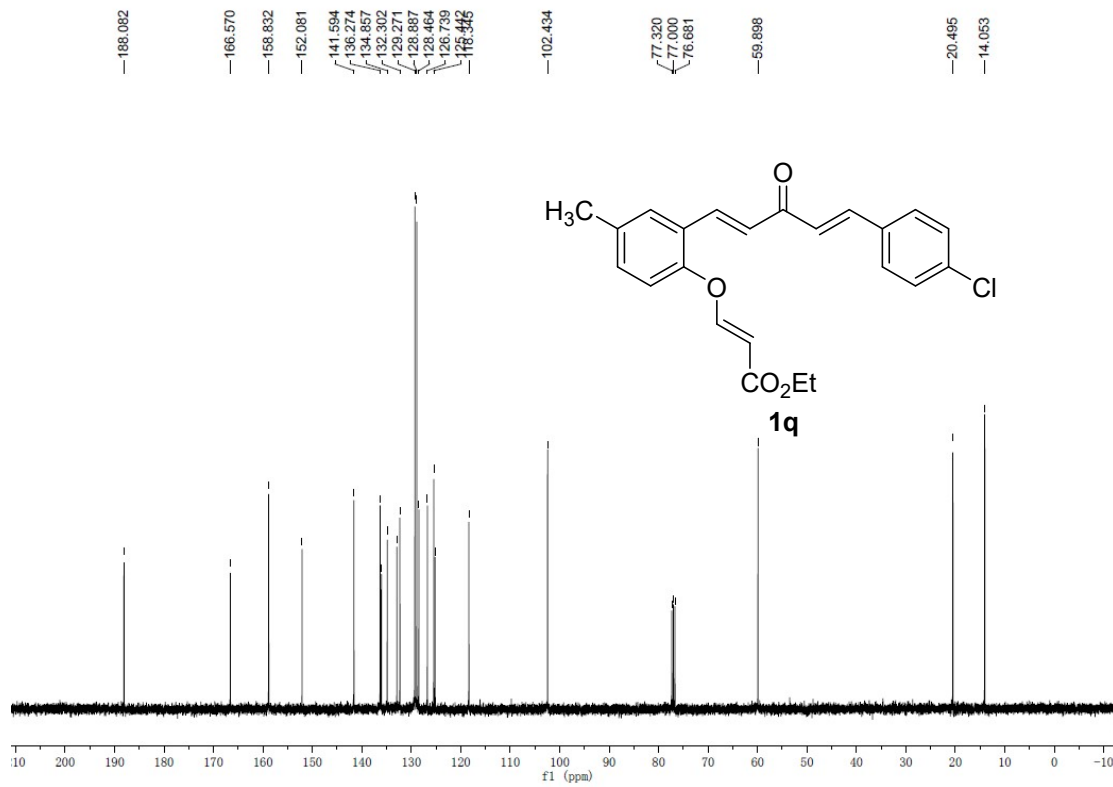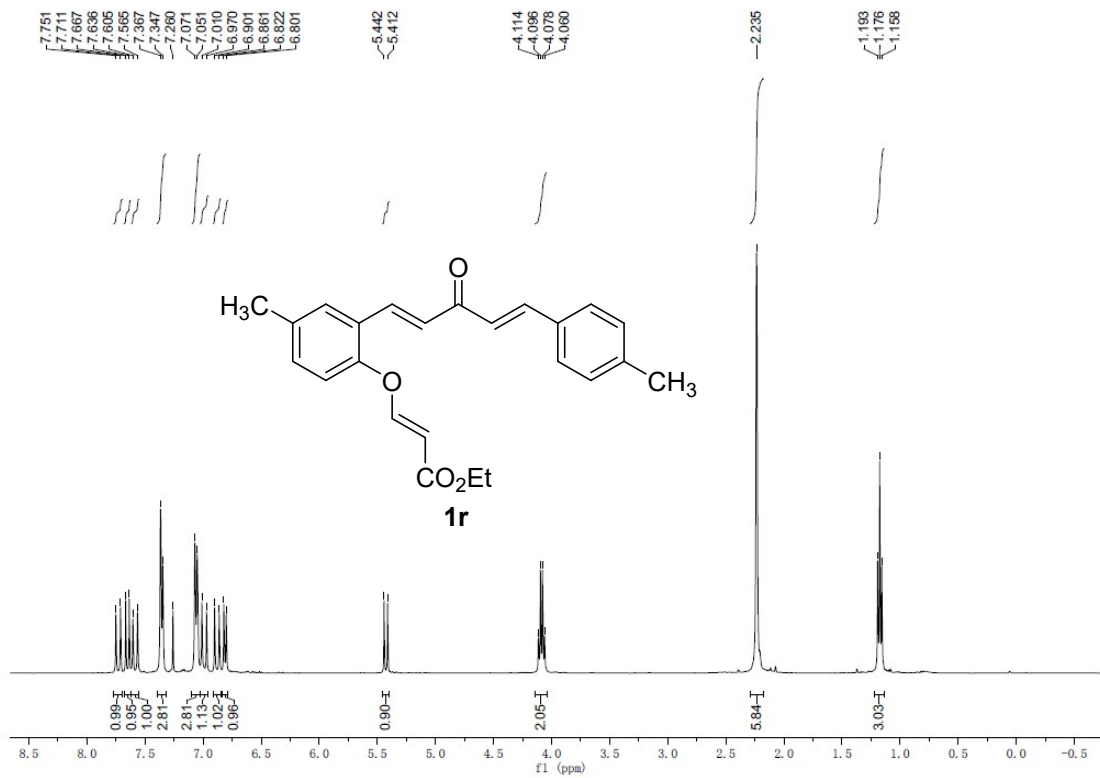

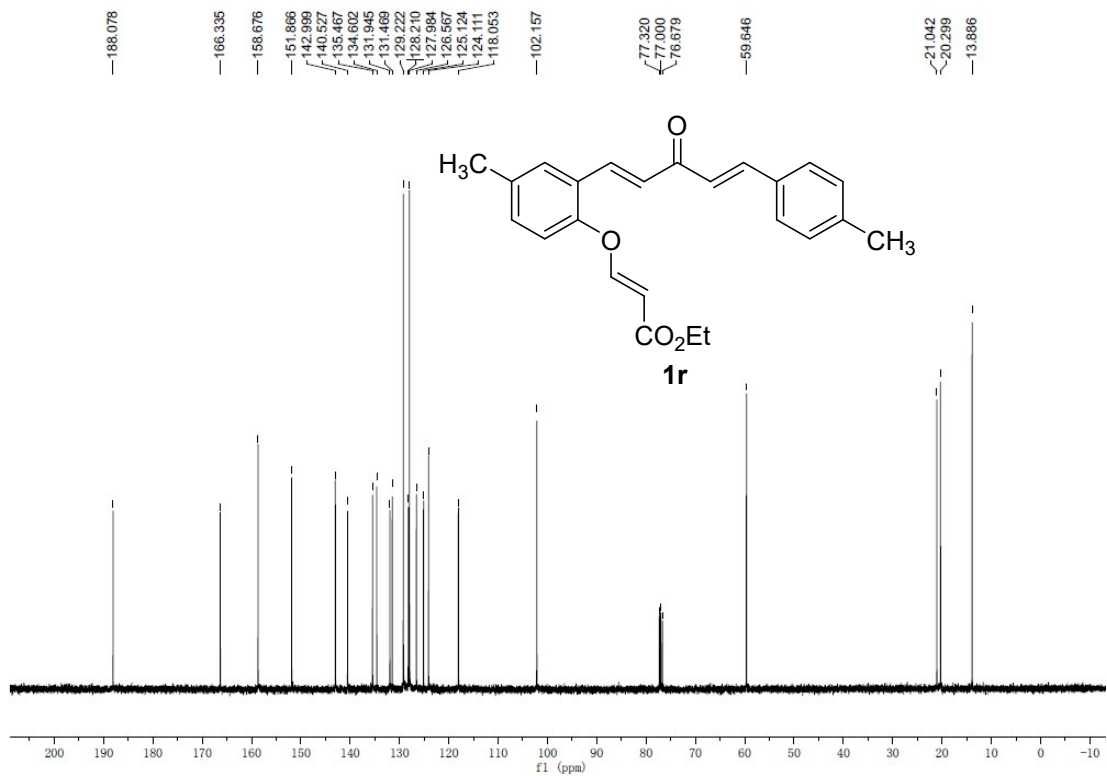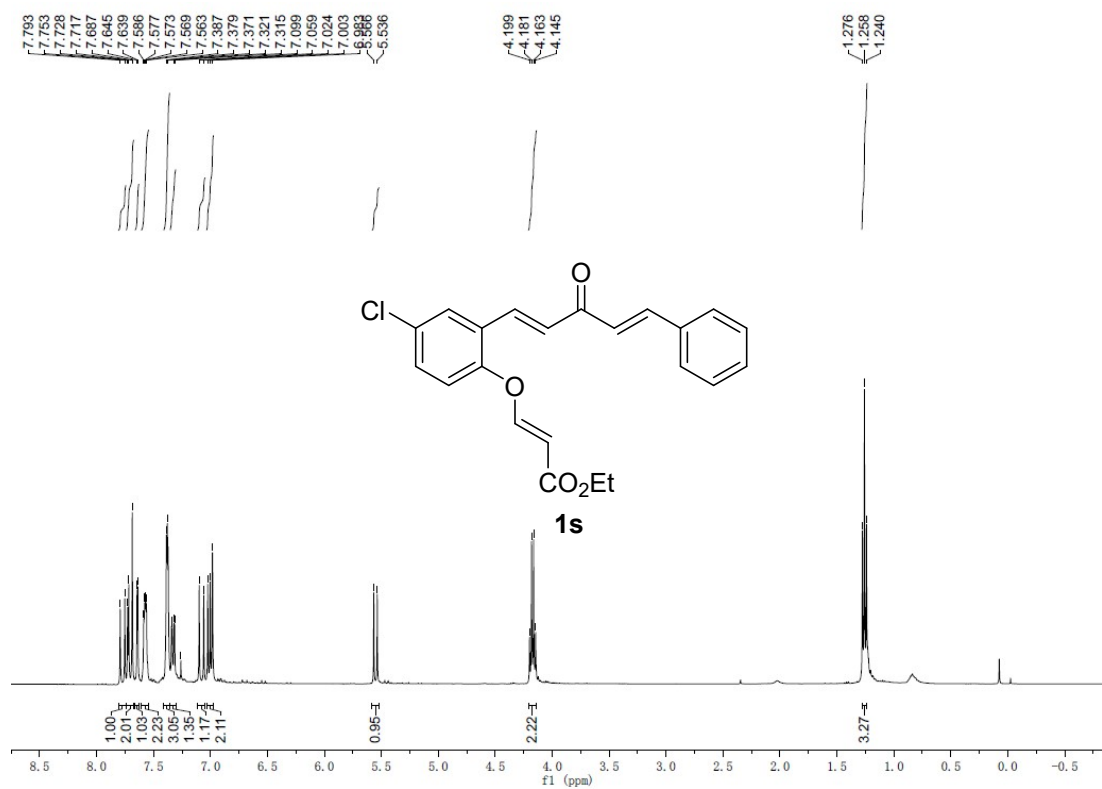

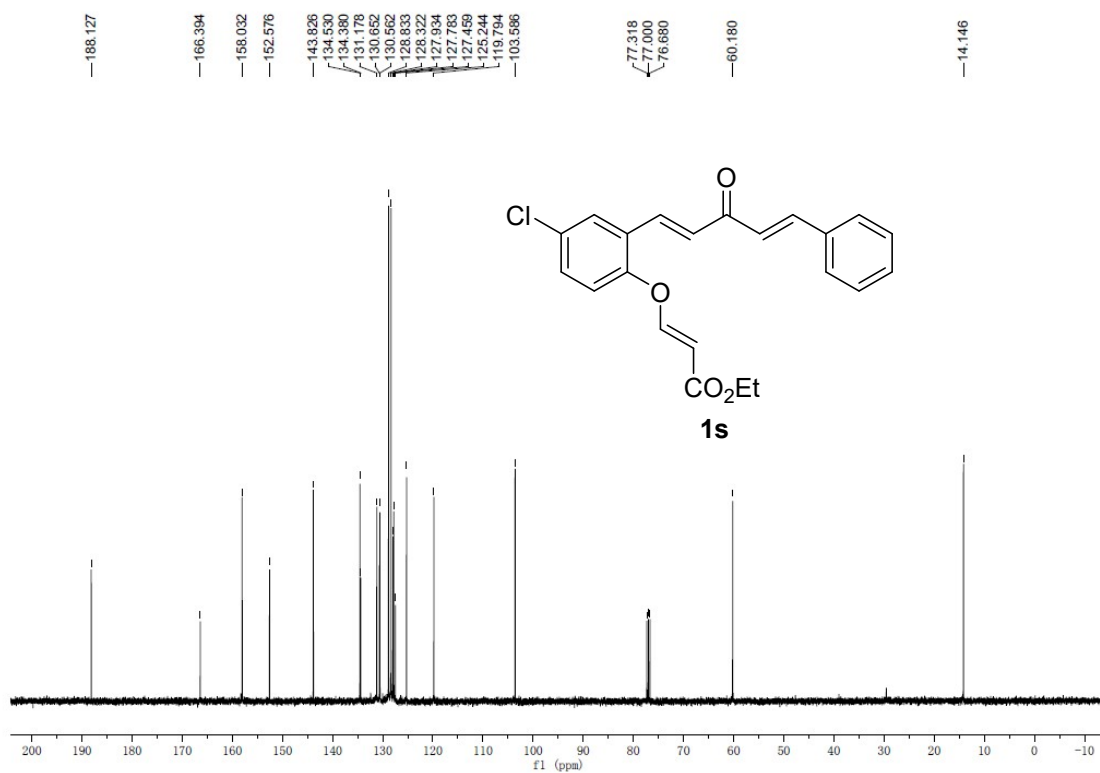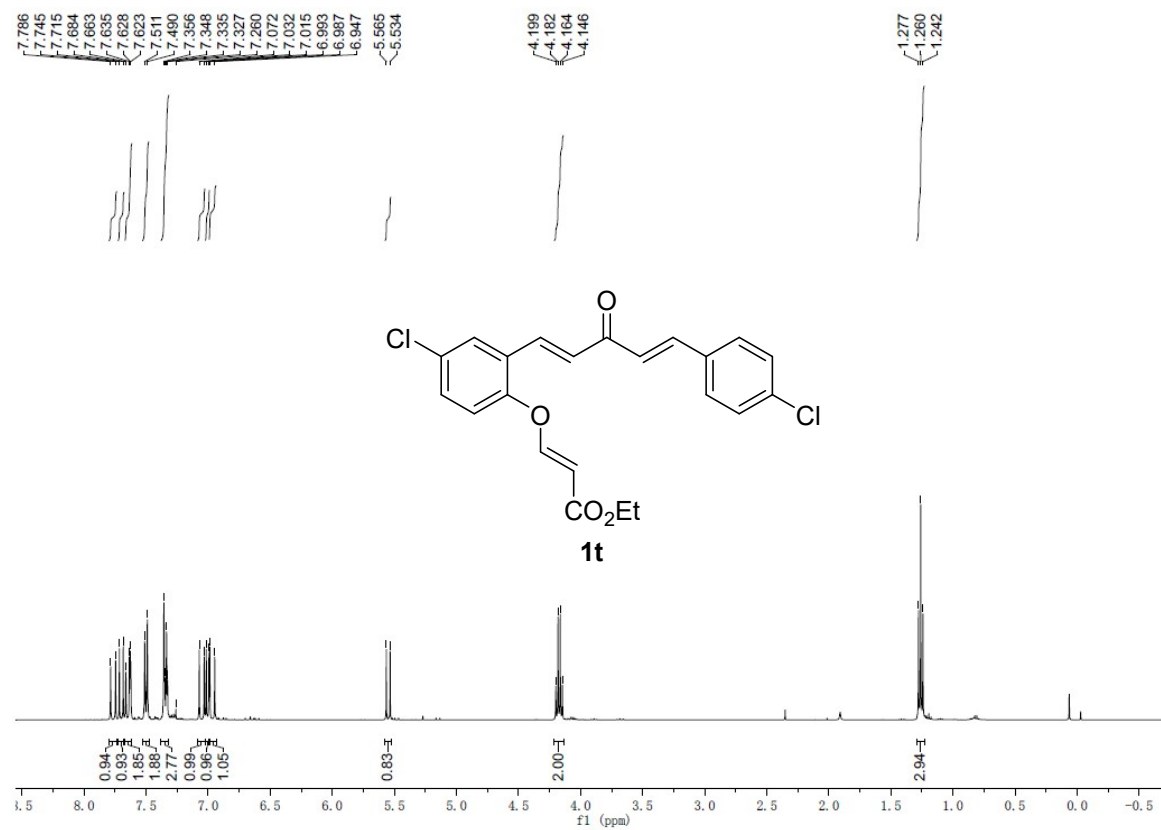

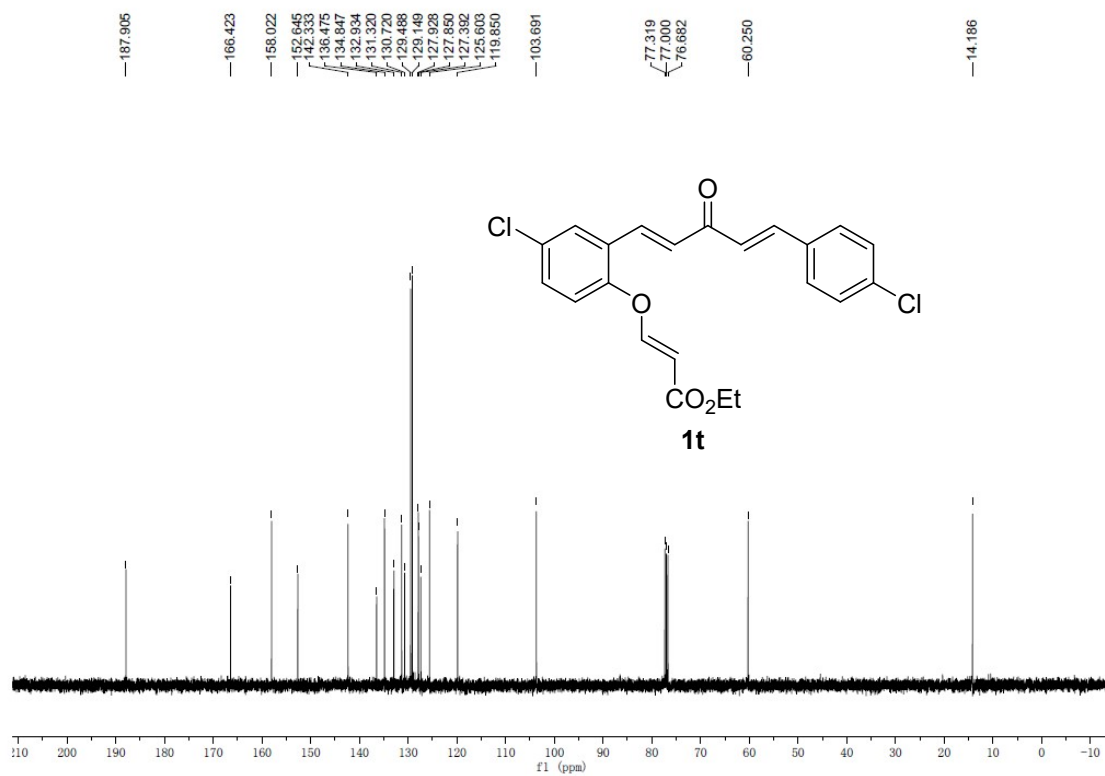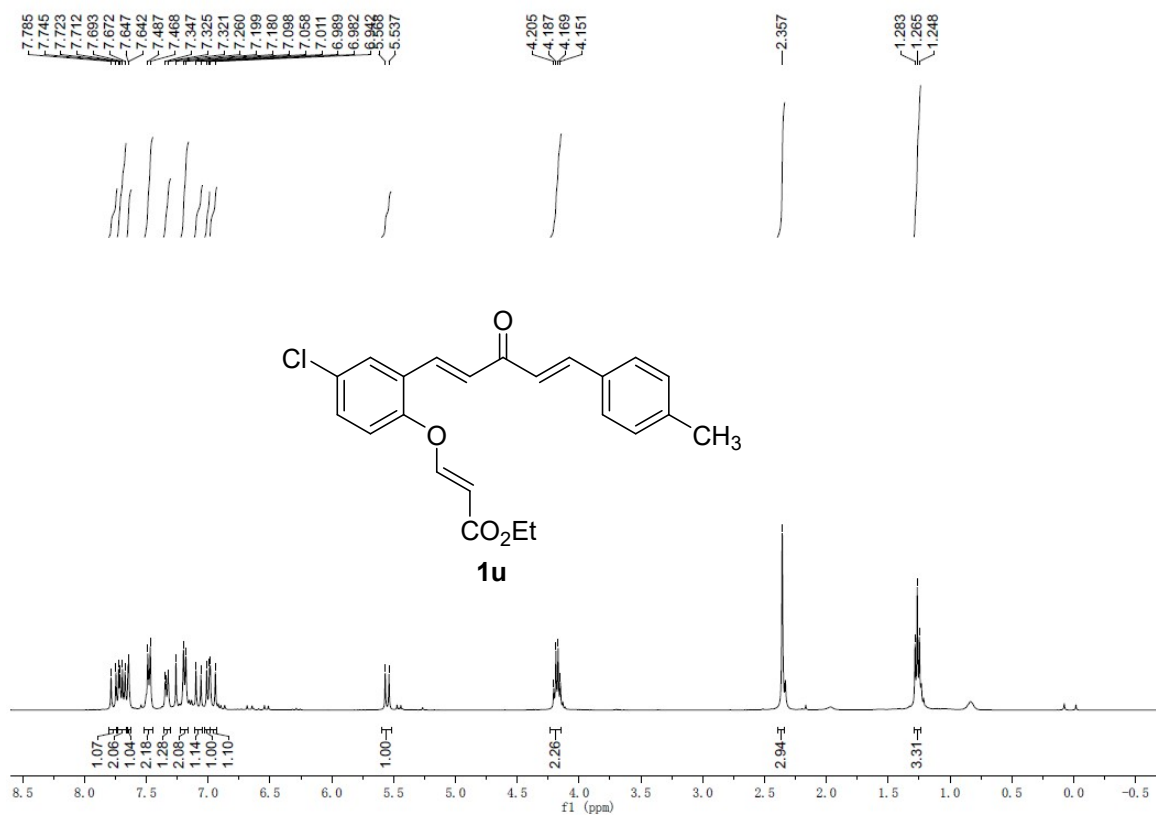



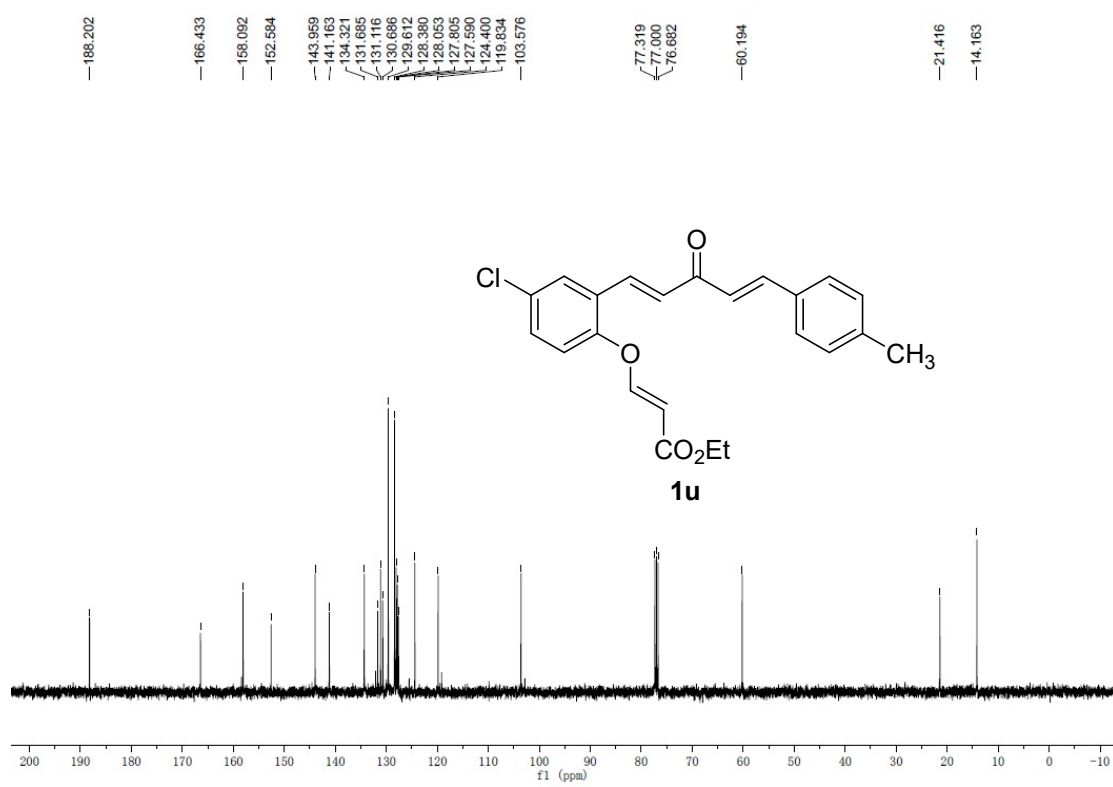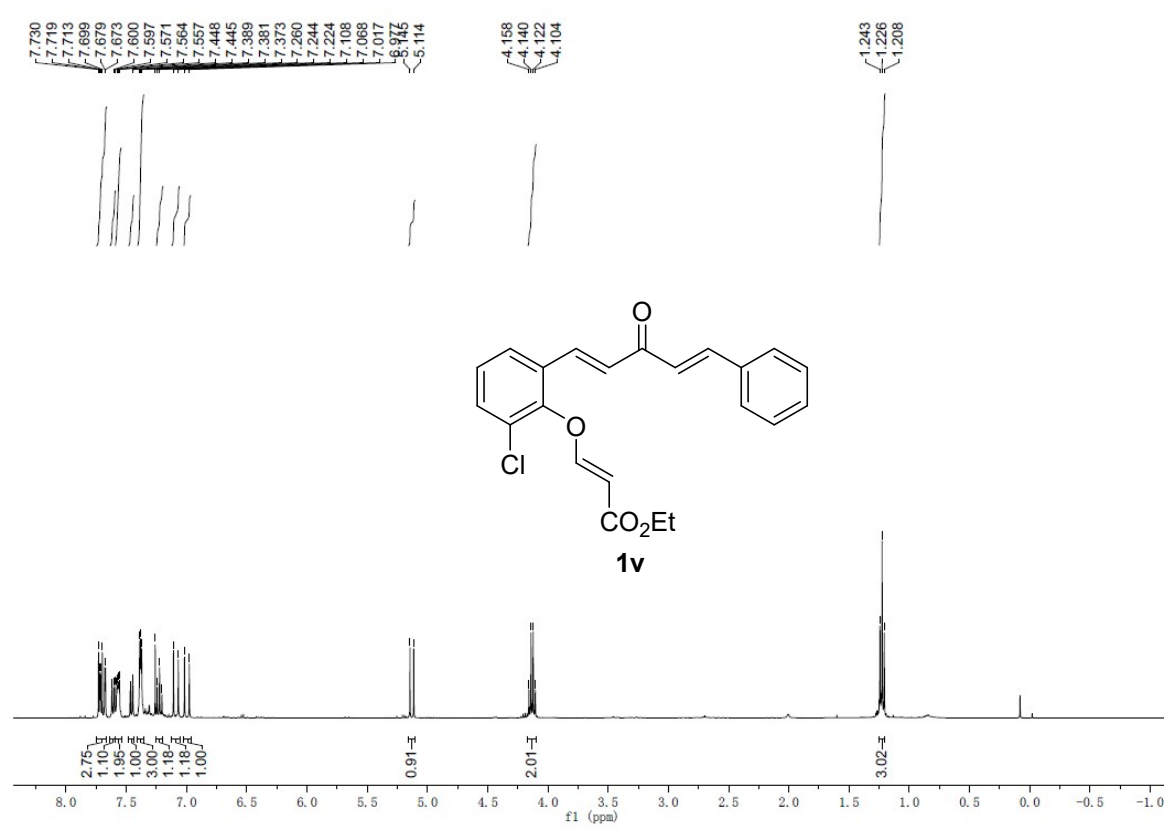

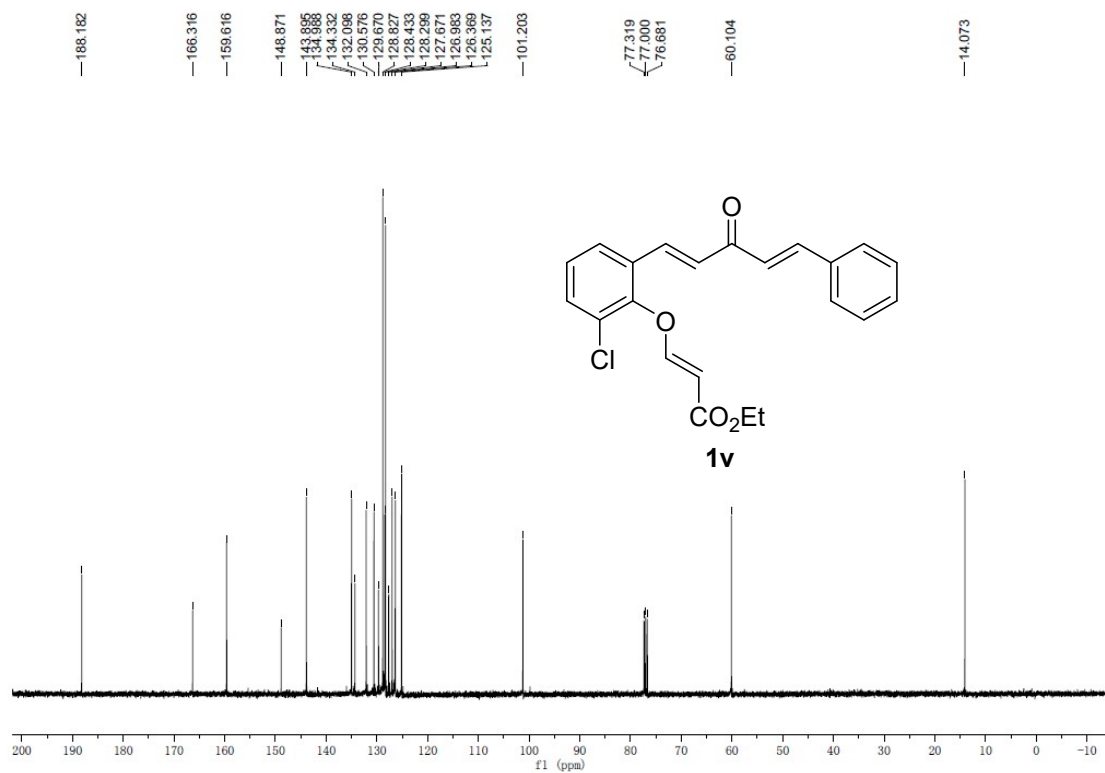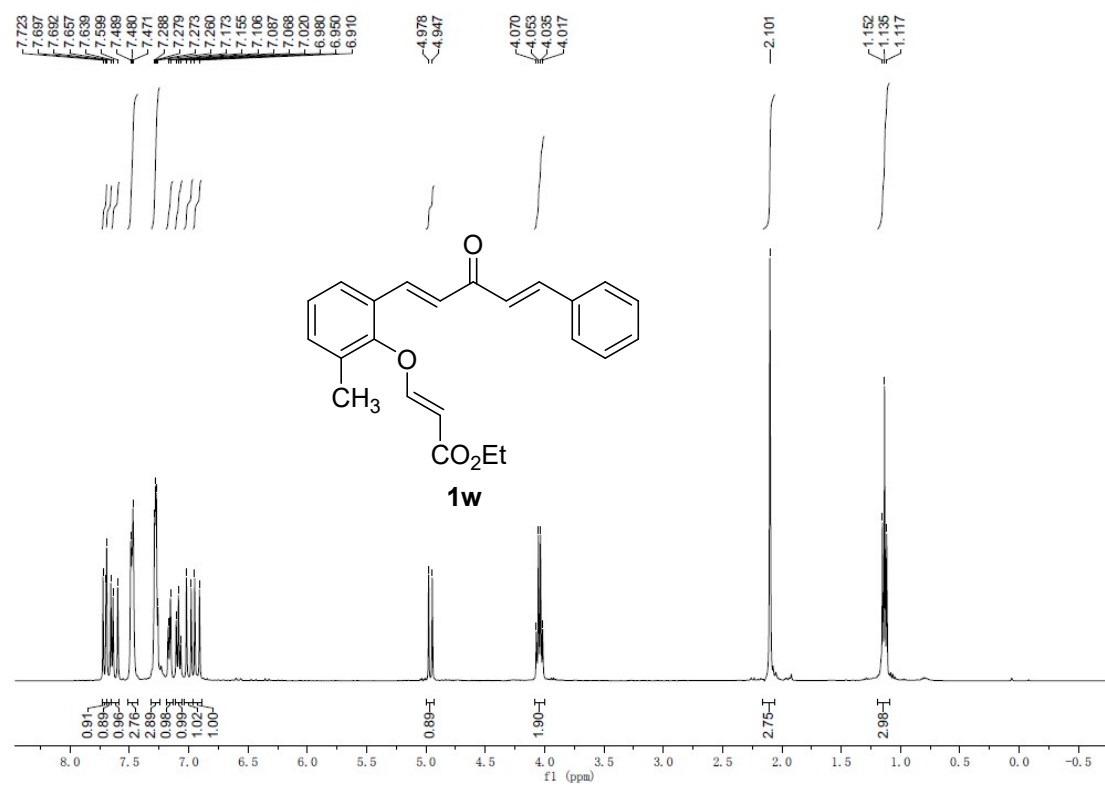

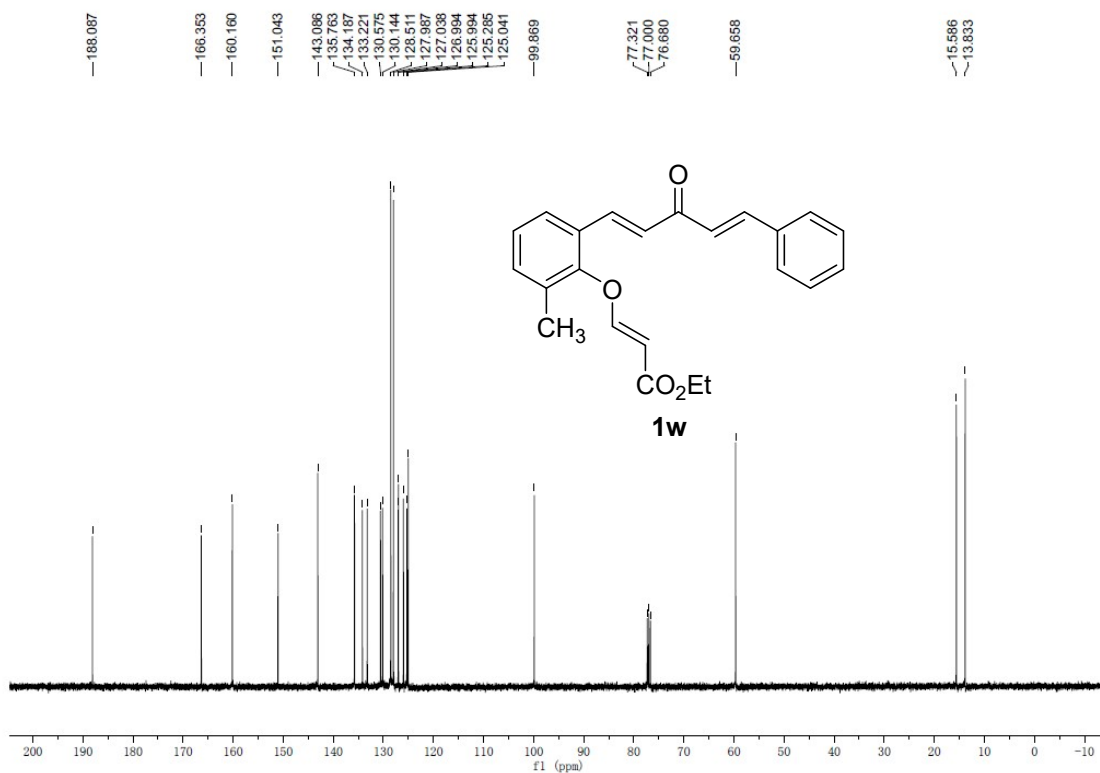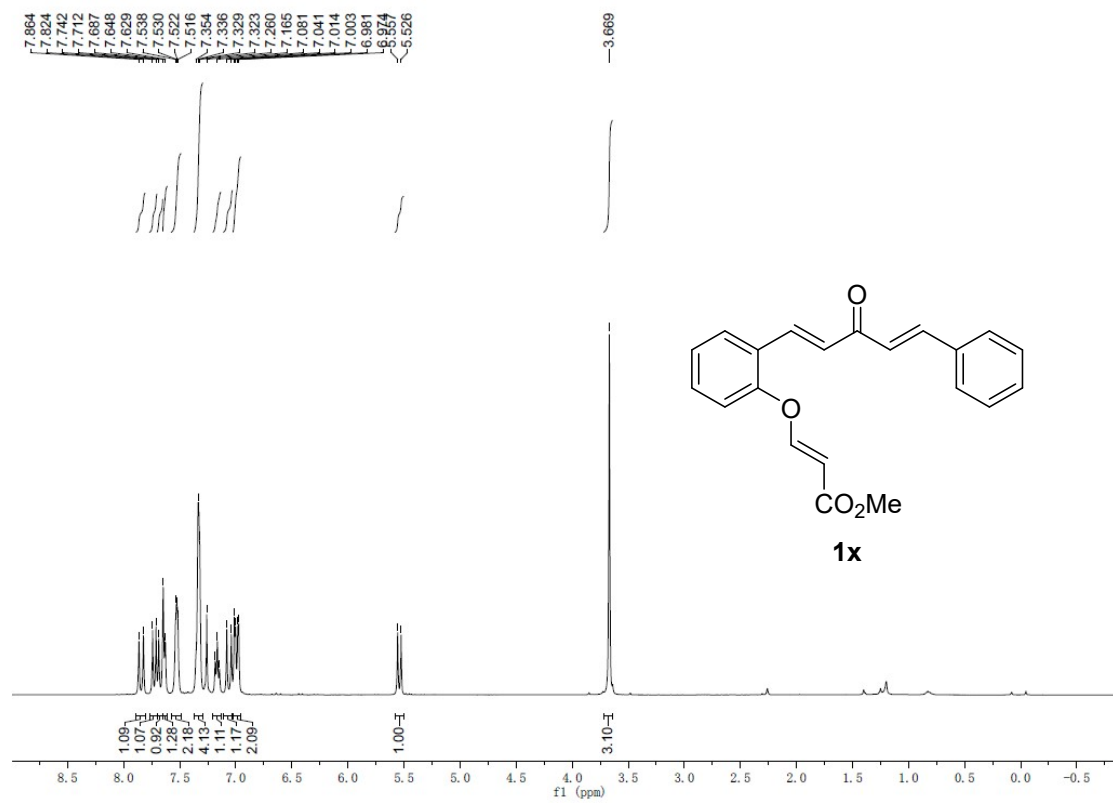

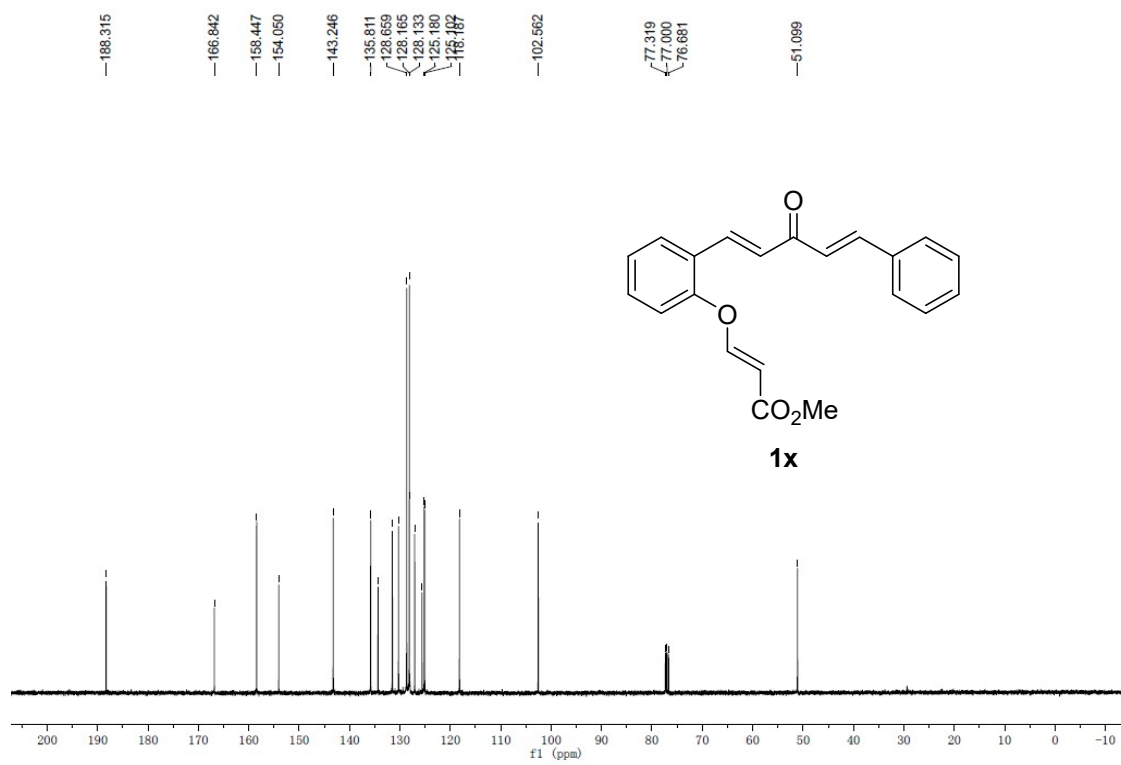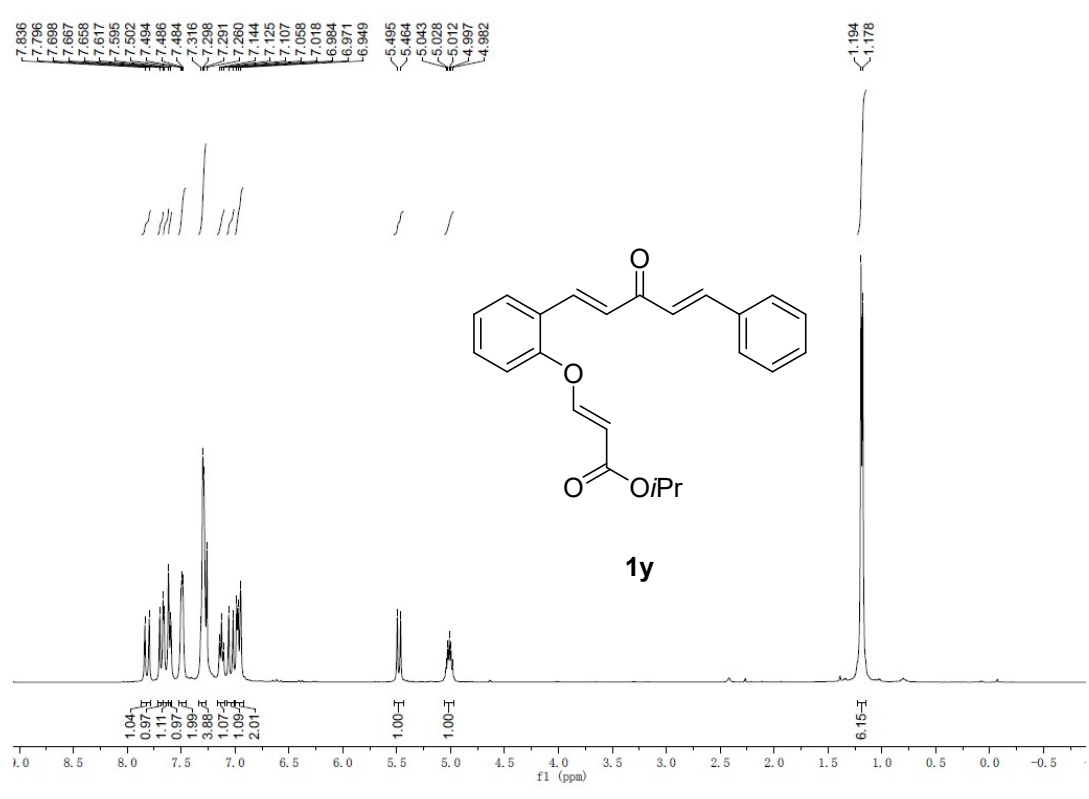

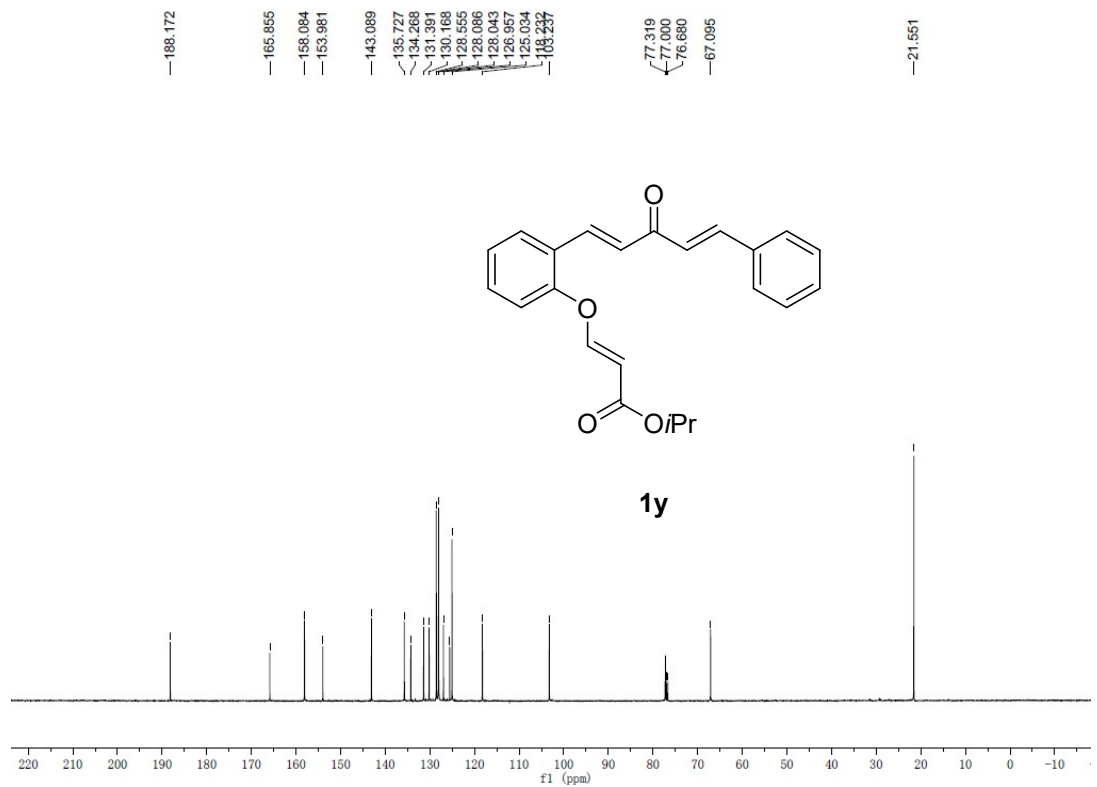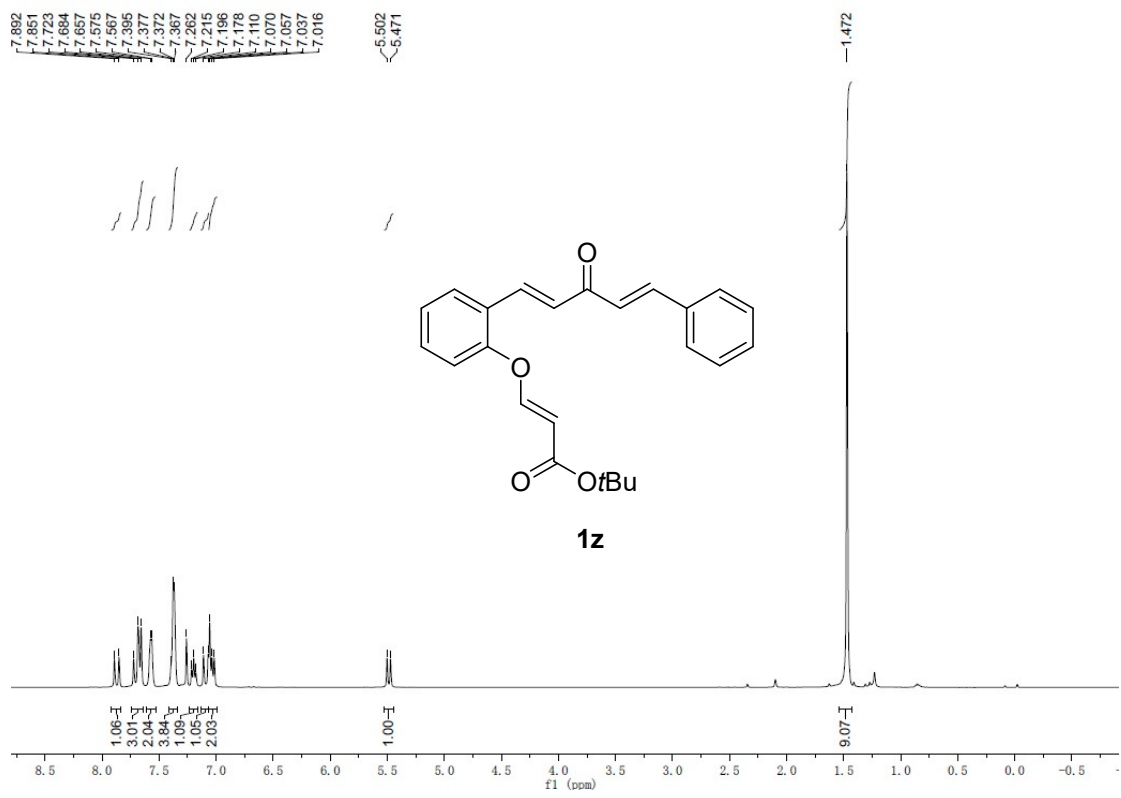

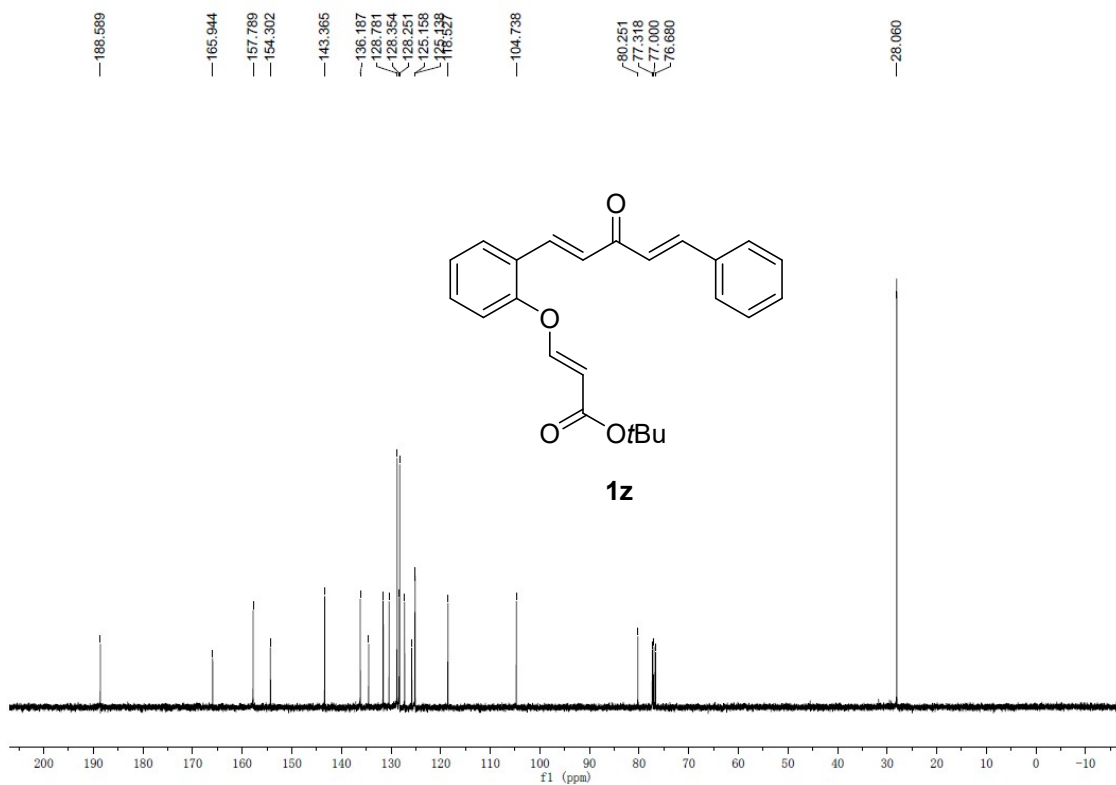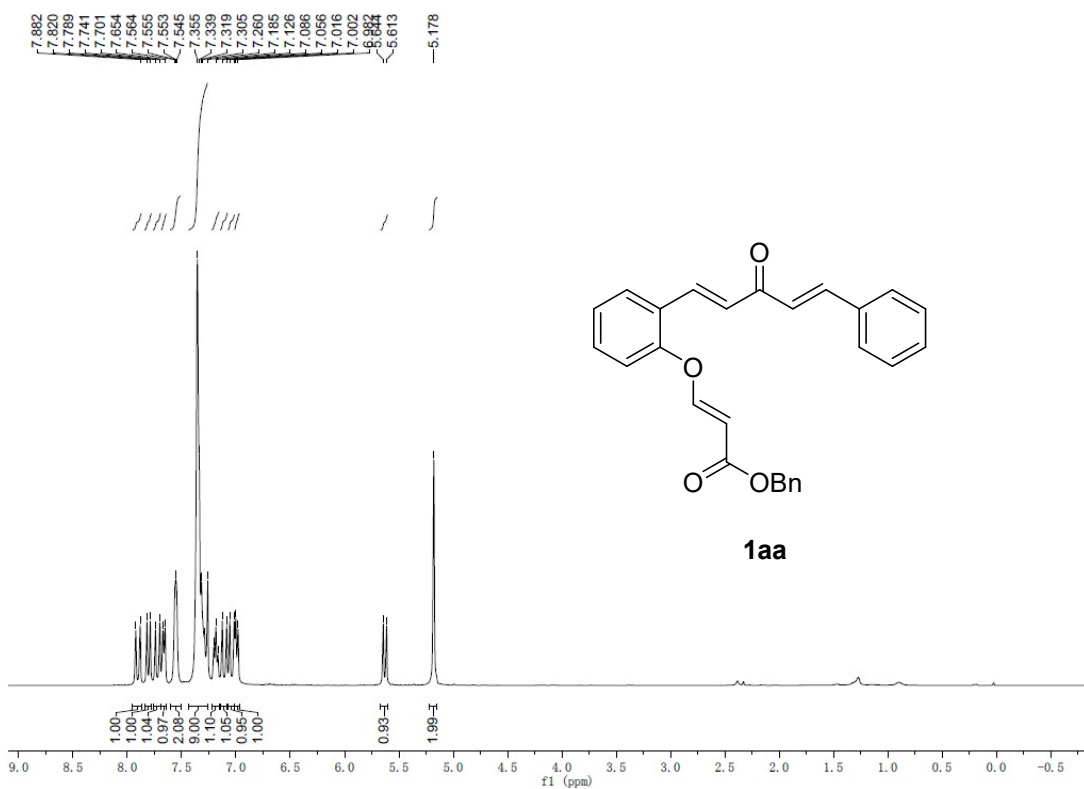

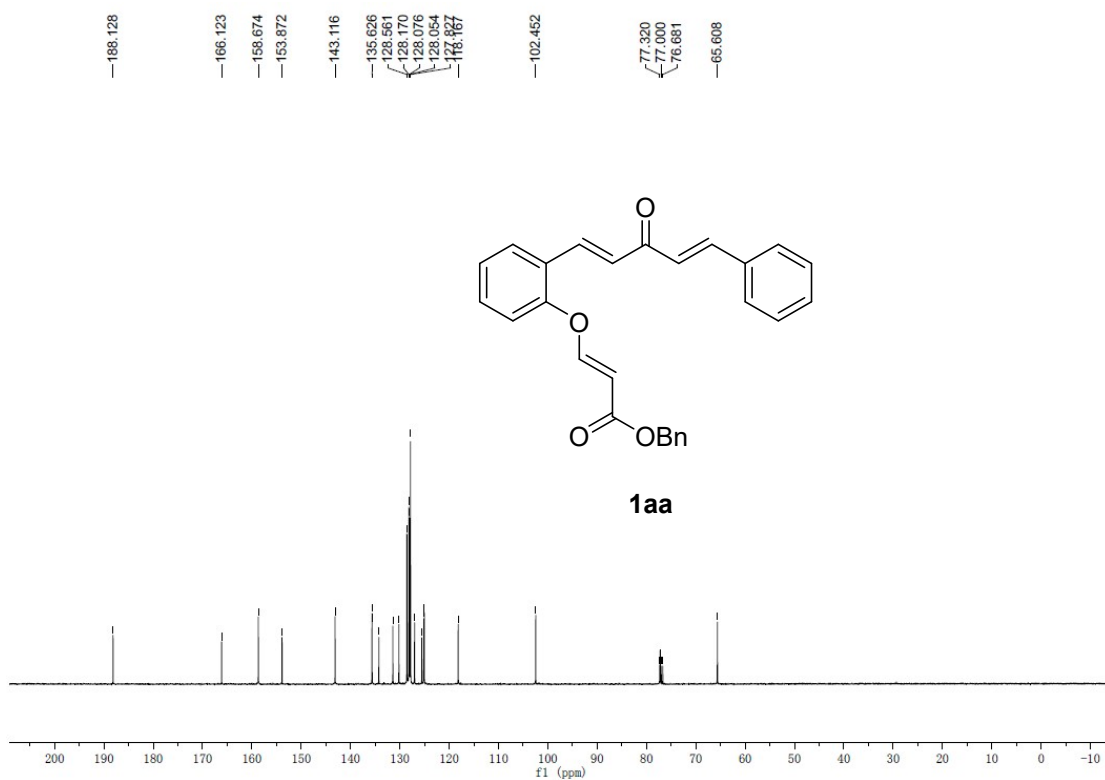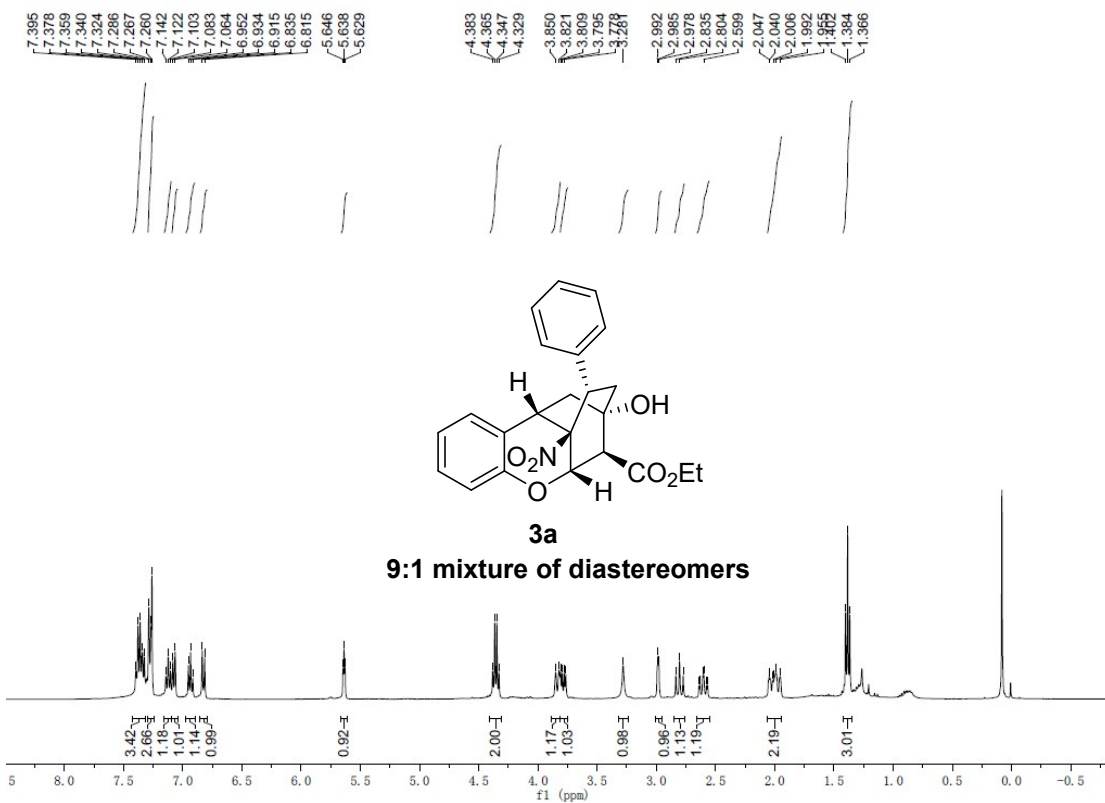

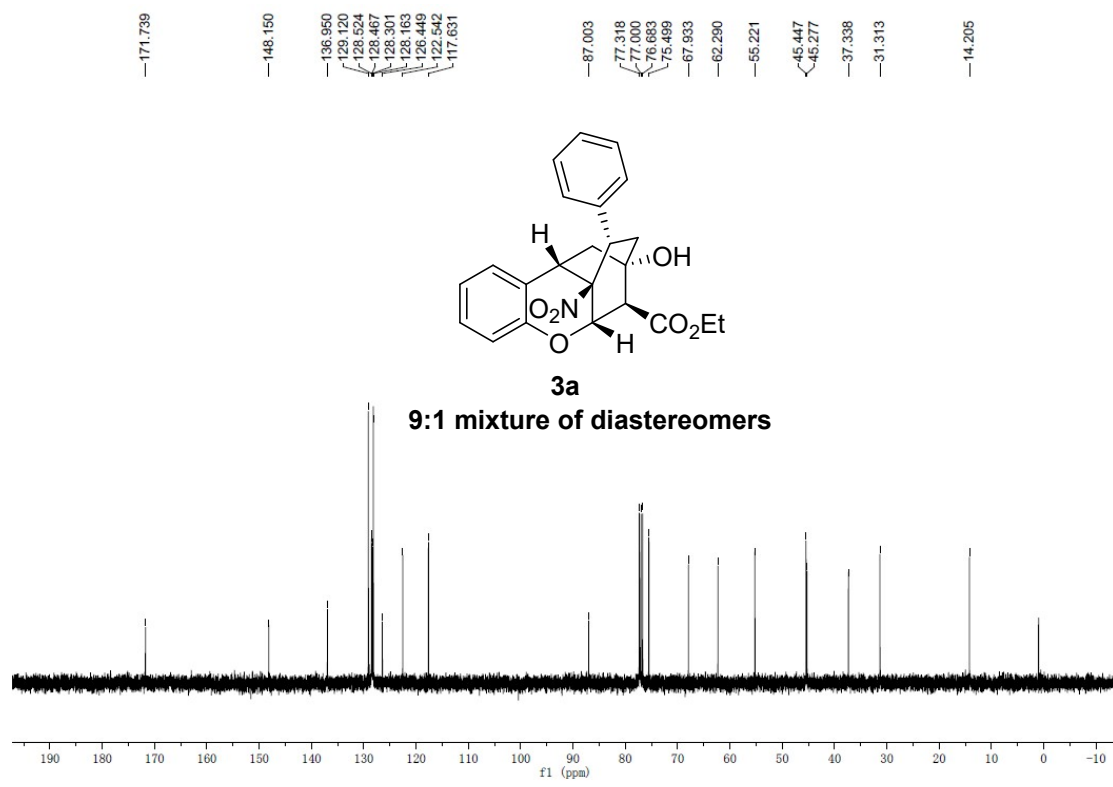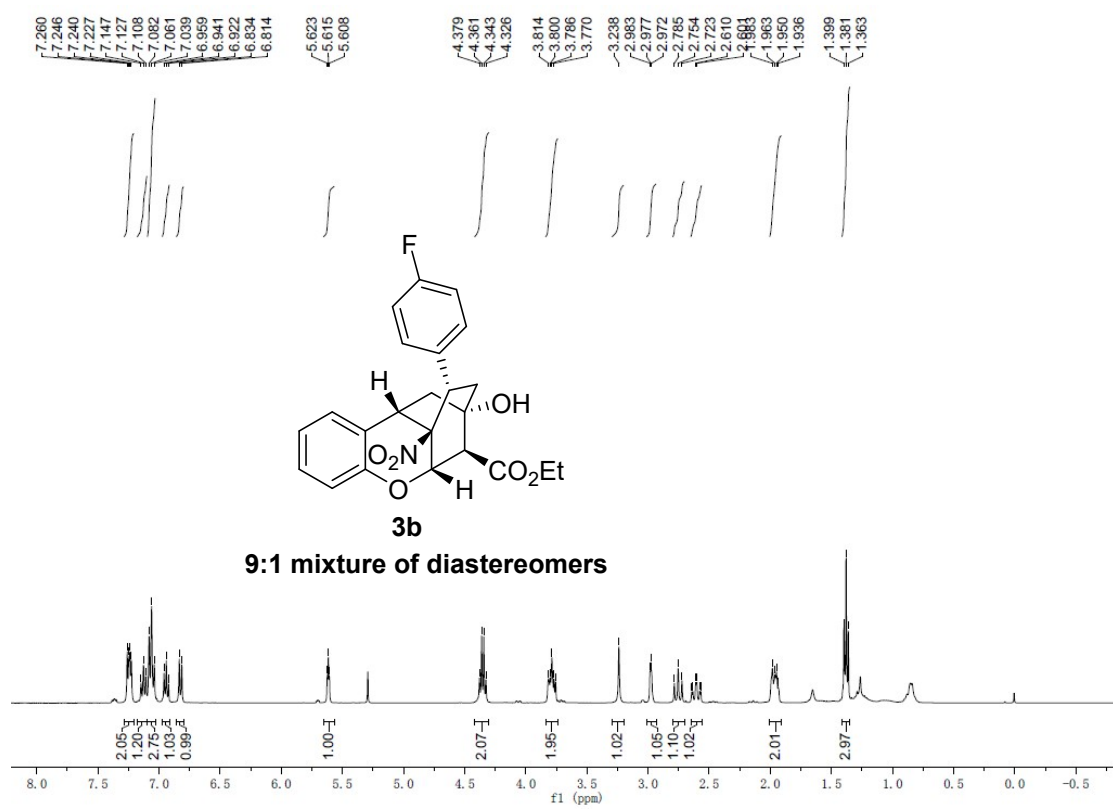



—171.679  
 —163.738  
 —161.271  
 —148.126  
 132.765  
 132.732  
 129.980  
 129.799  
 128.558  
 128.495  
 126.290  
 122.617  
 117.961  
 116.212  
 115.996  
 —86.963  
 77.318  
 77.000  
 76.682  
 75.430  
 —67.855  
 —62.327  
 —55.207  
 45.291  
 44.776  
 —37.570  
 —31.254  
 —14.205

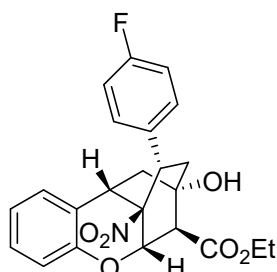

**3b**

**9:1 mixture of diastereomers**

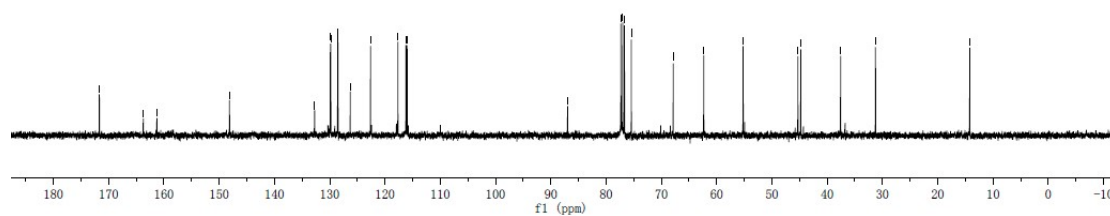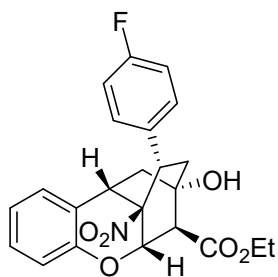

**3b**

**9:1 mixture of diastereomers**

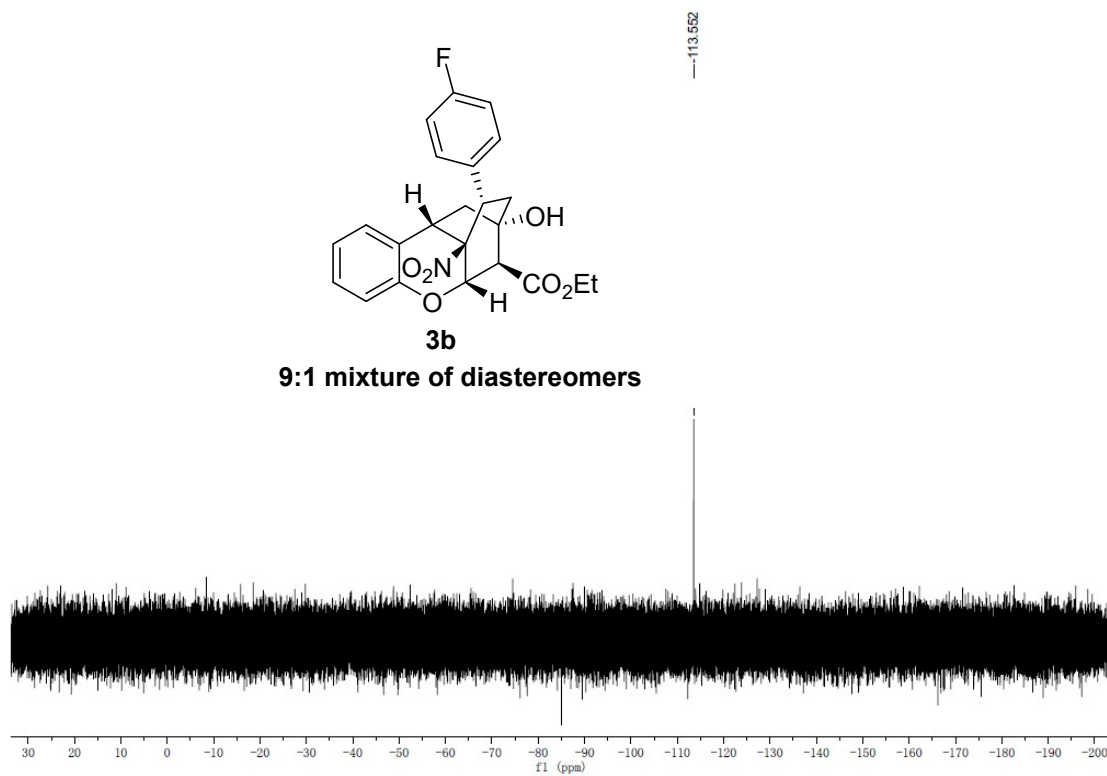

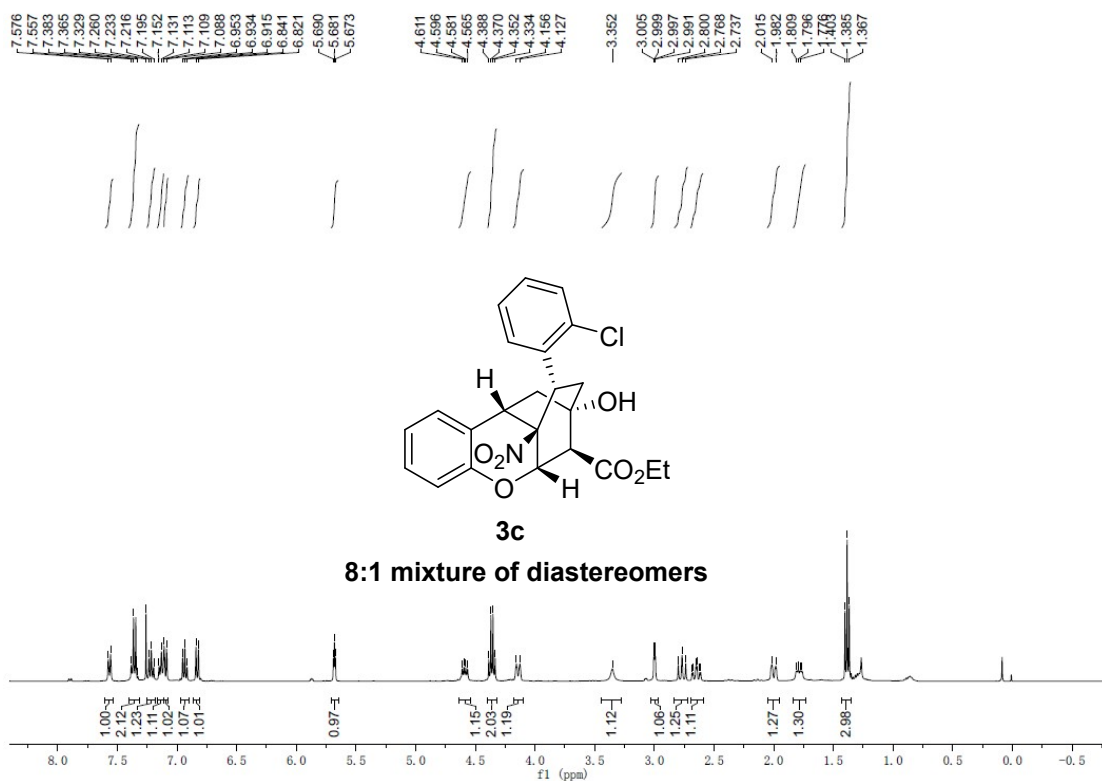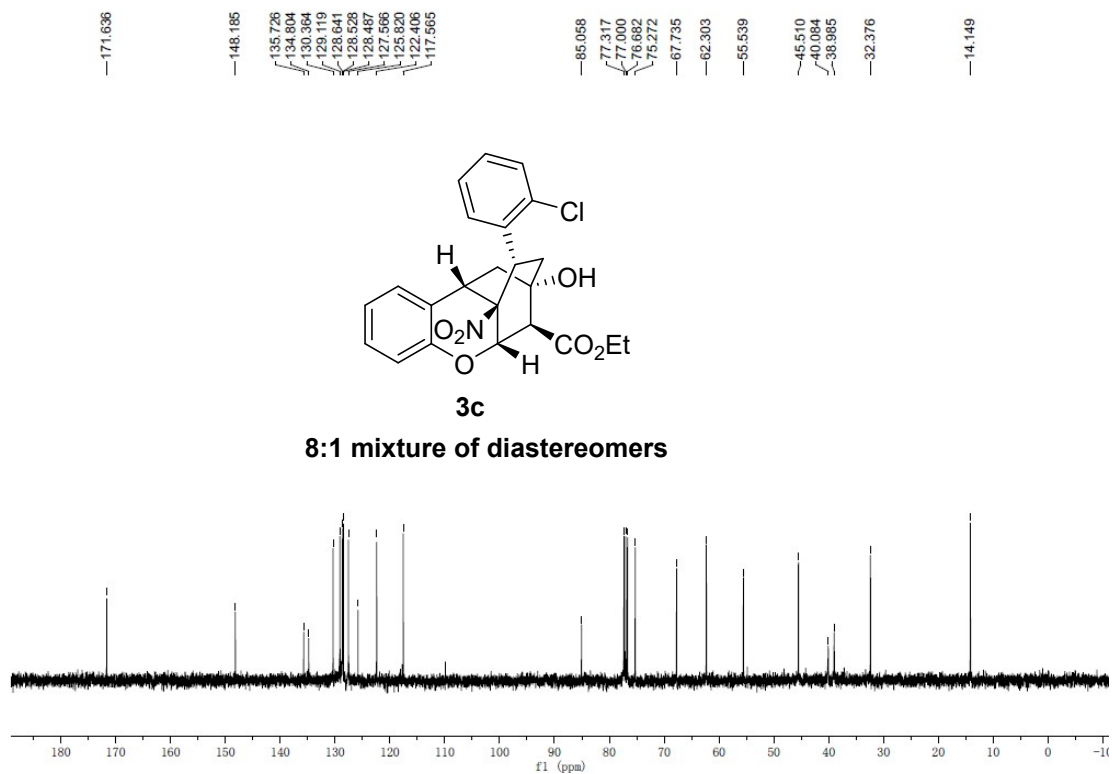

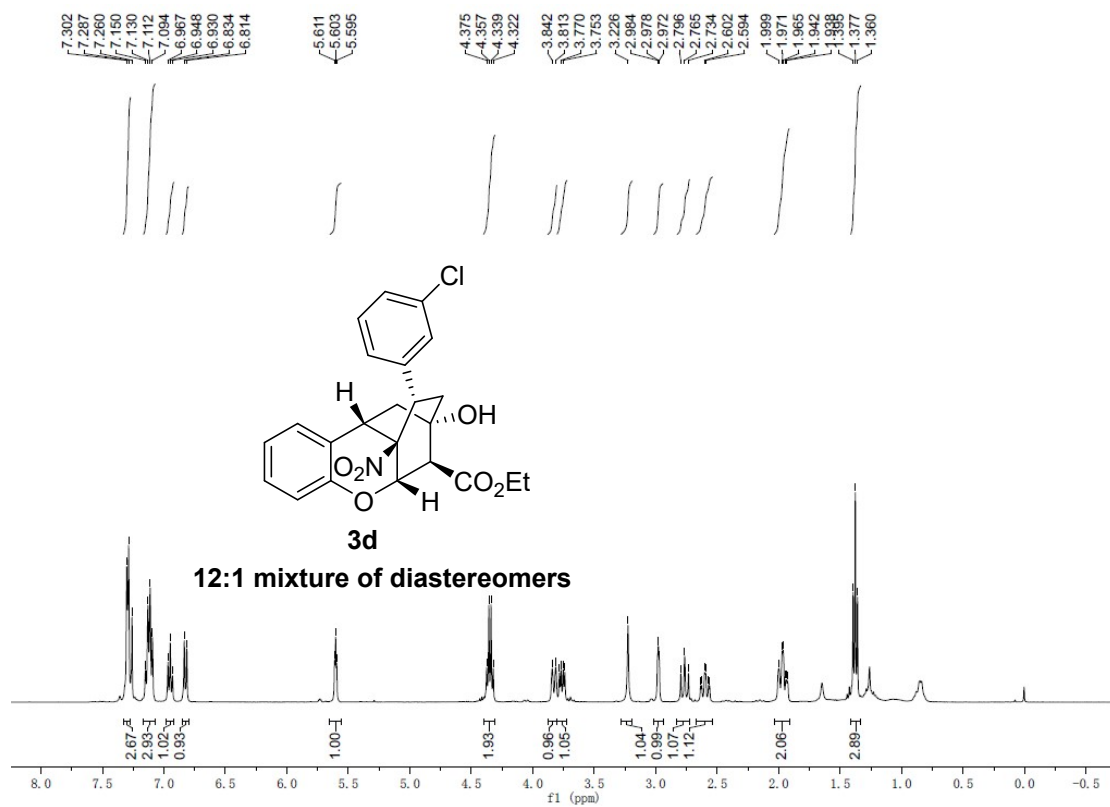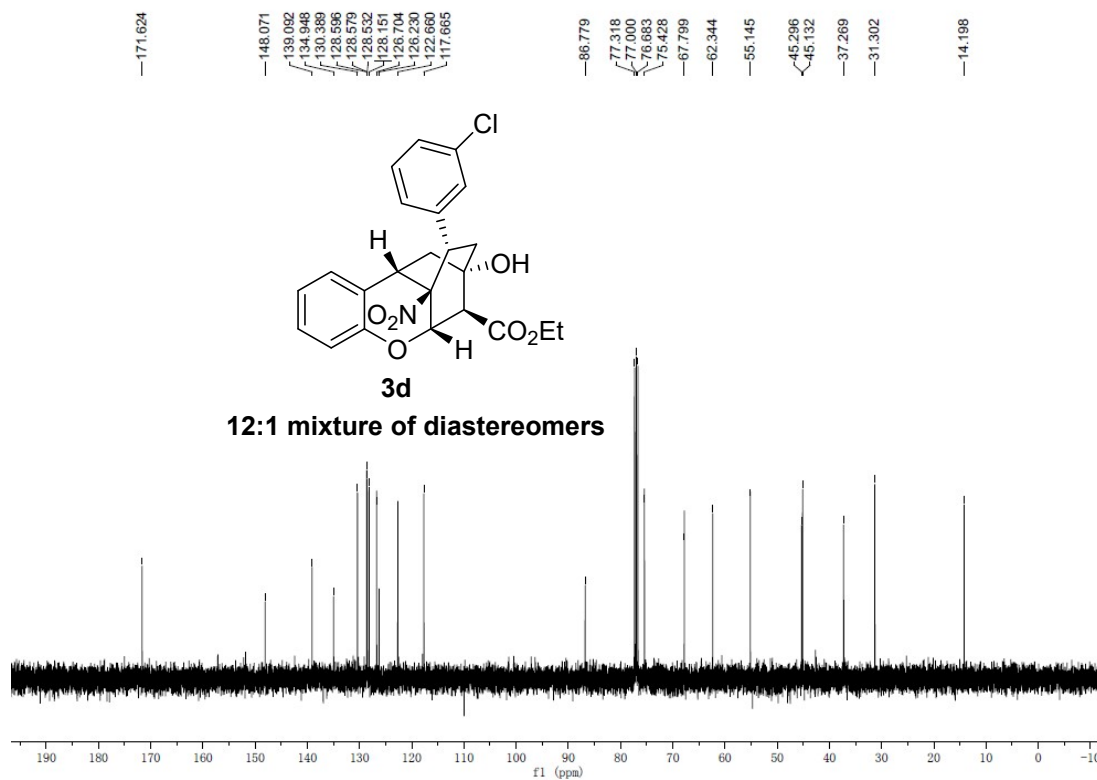

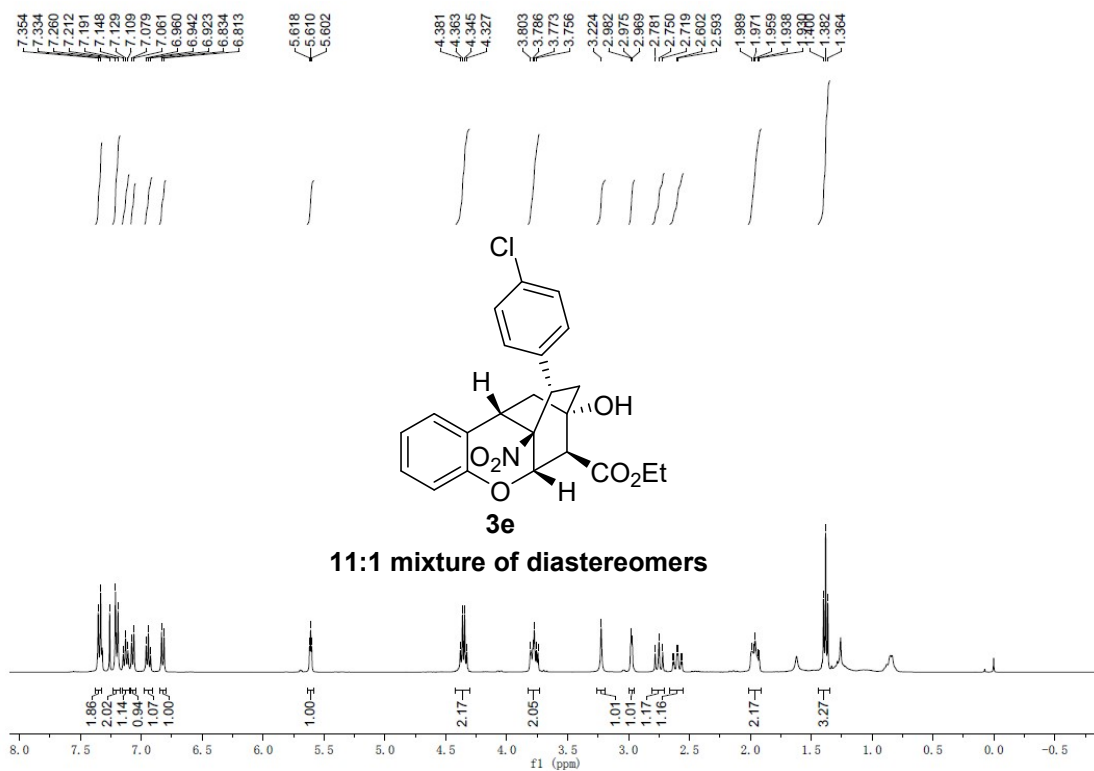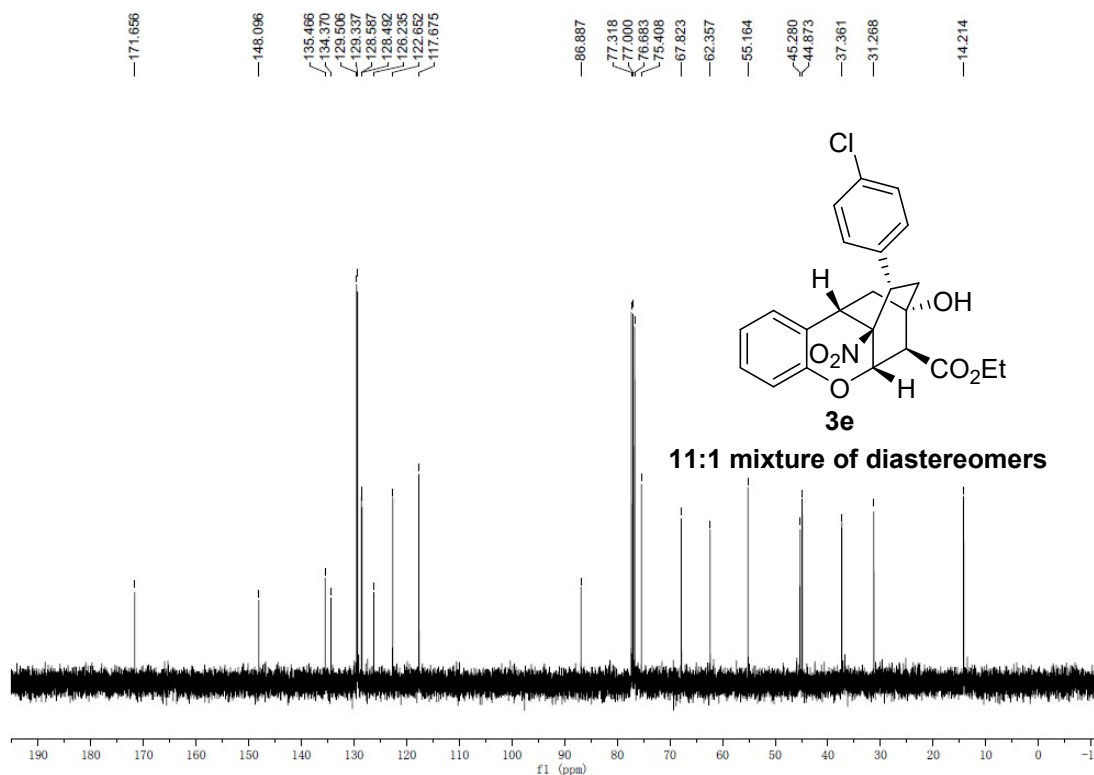

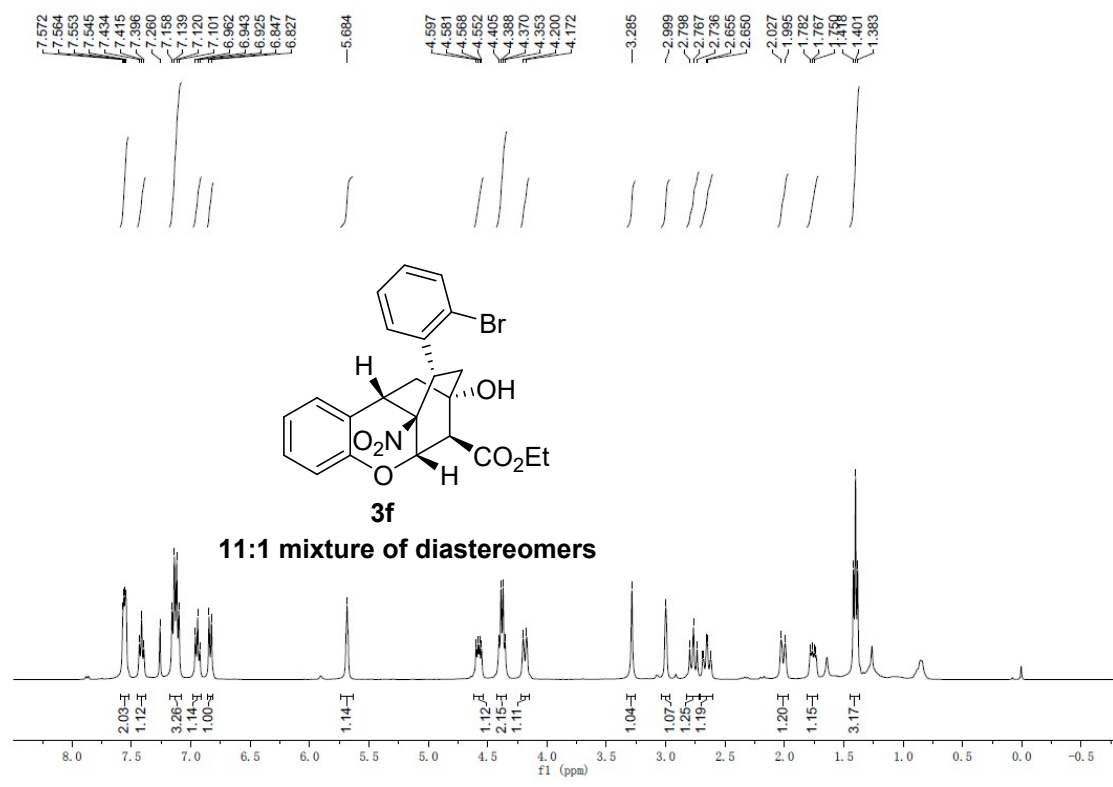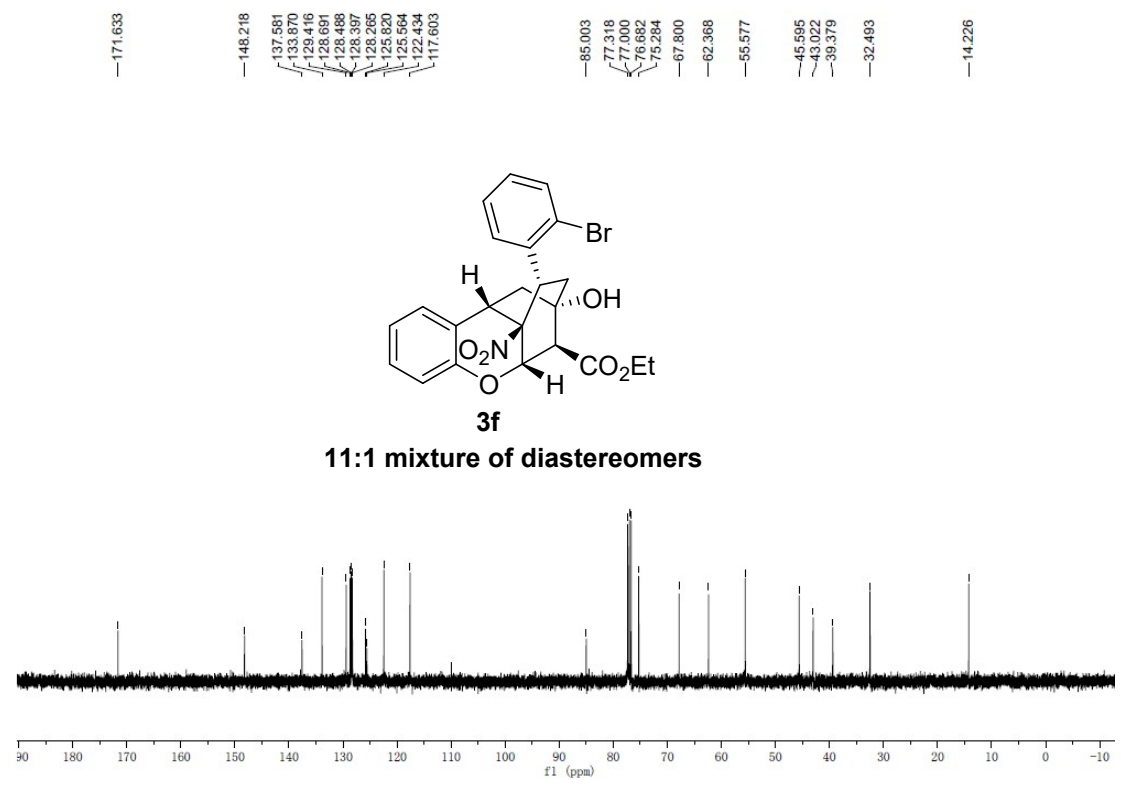

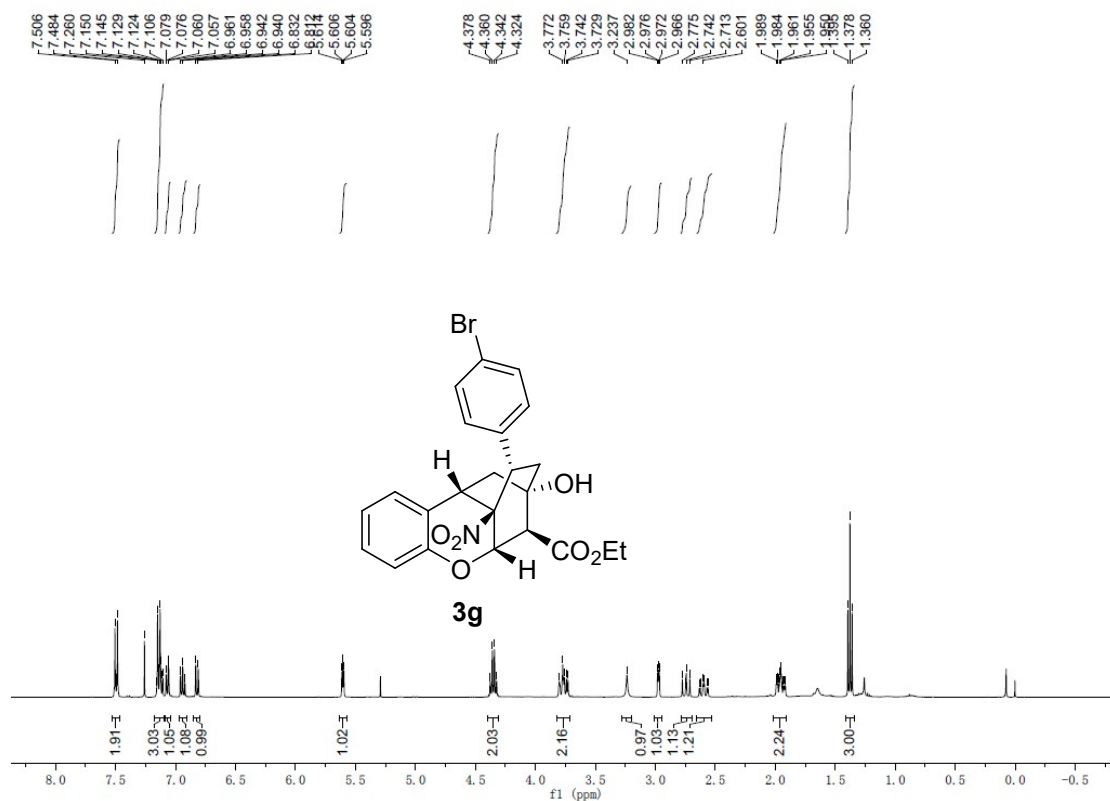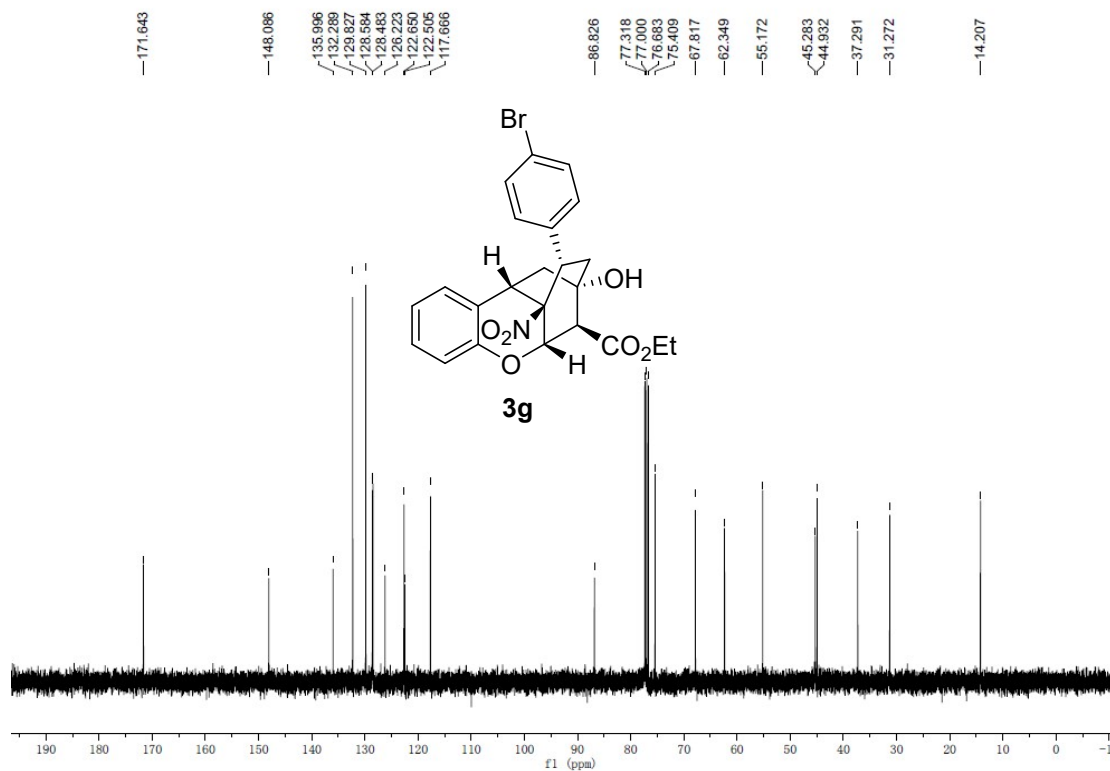

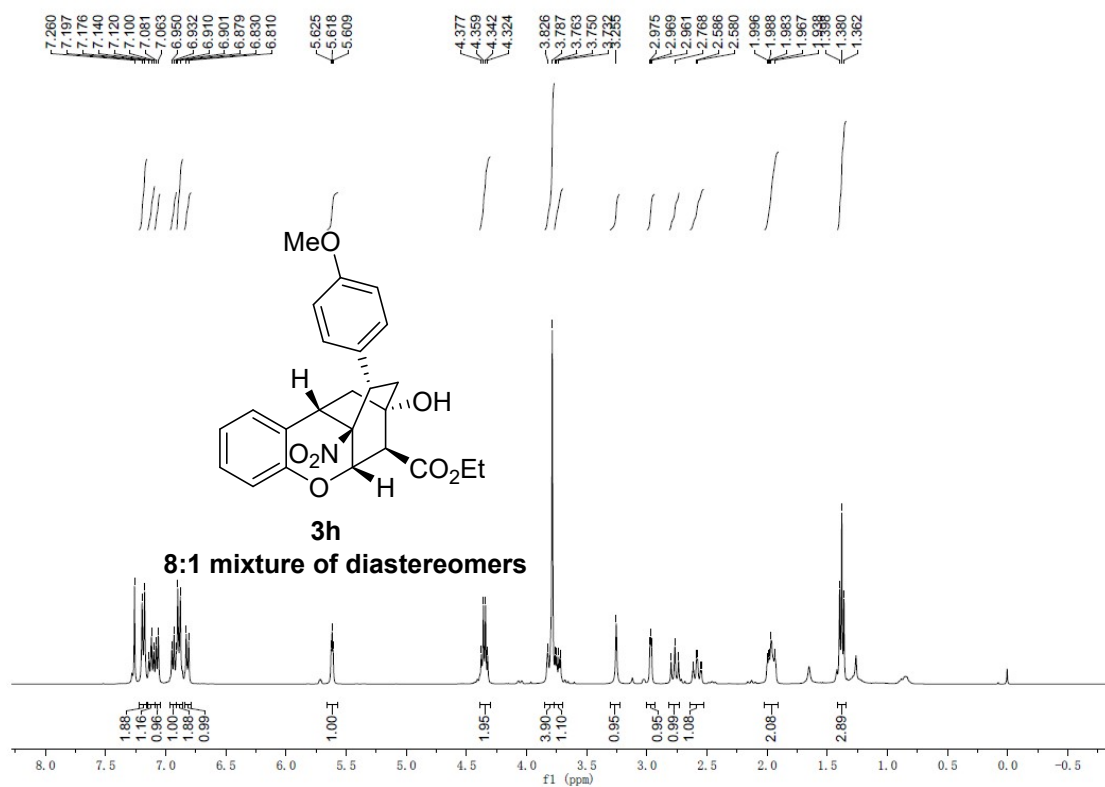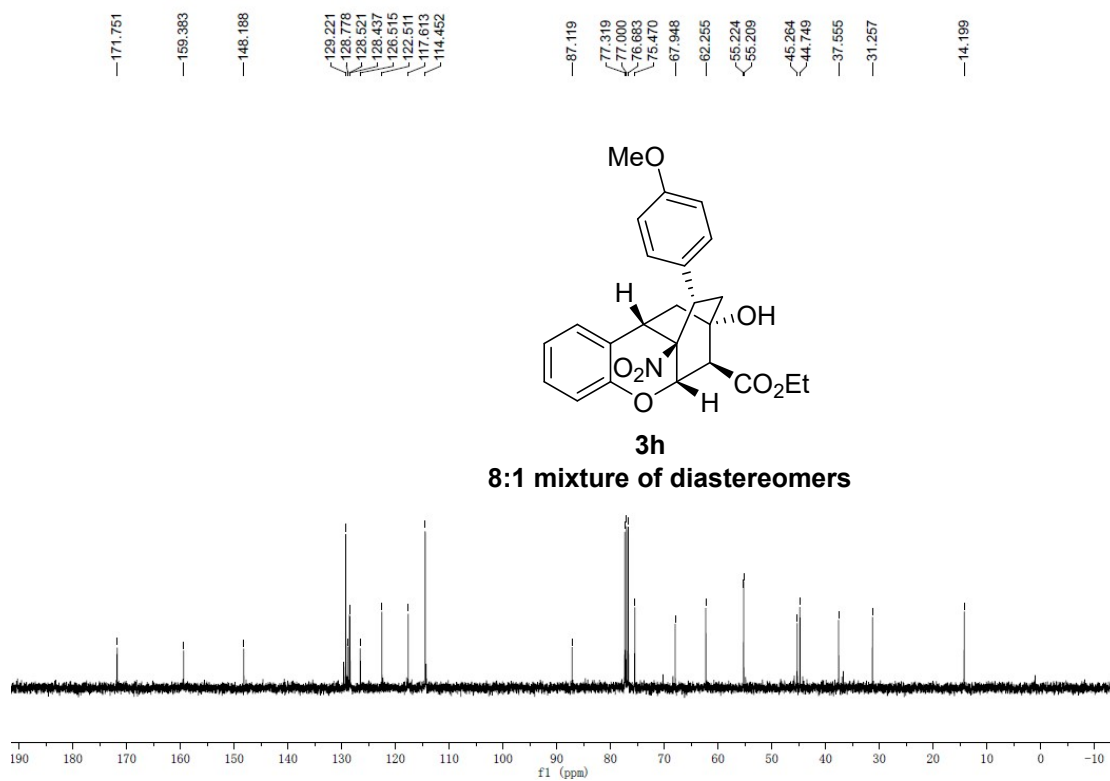

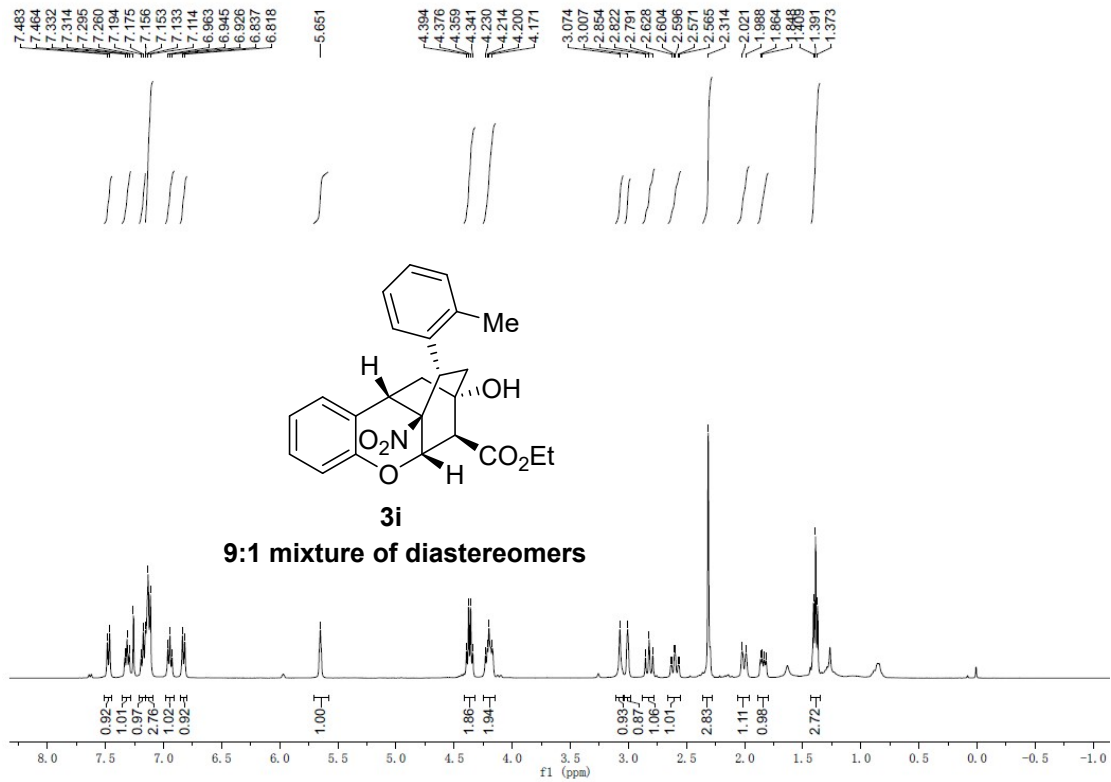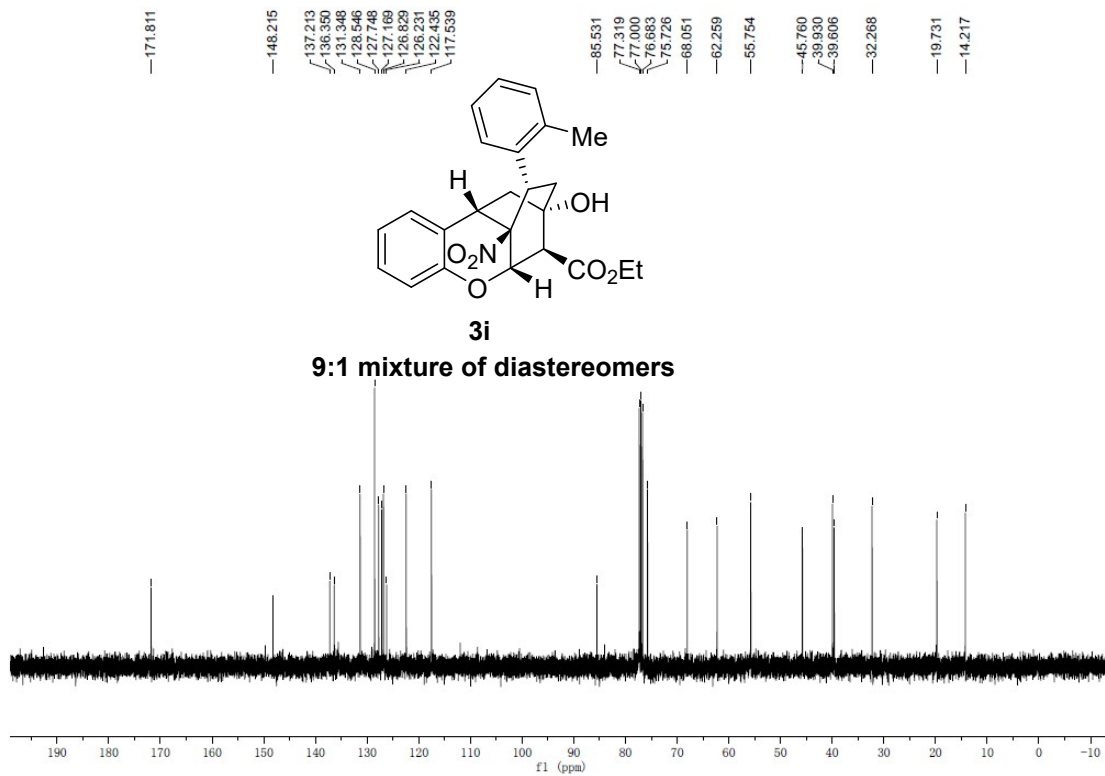



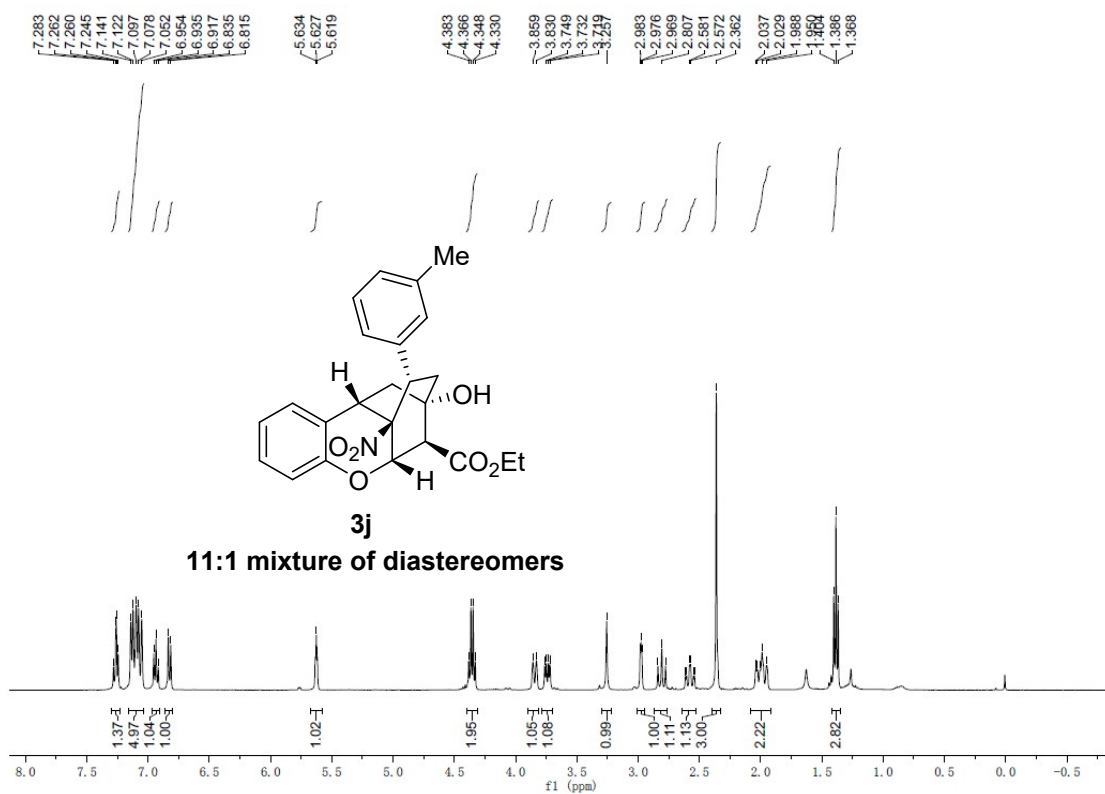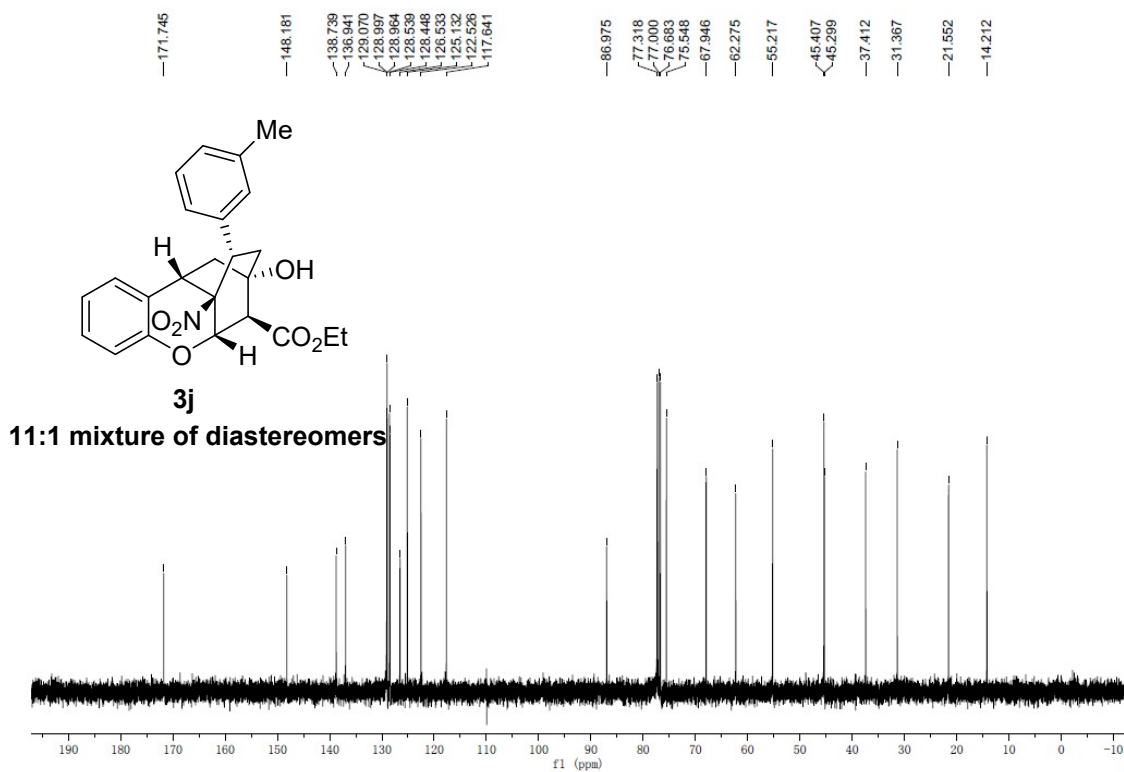

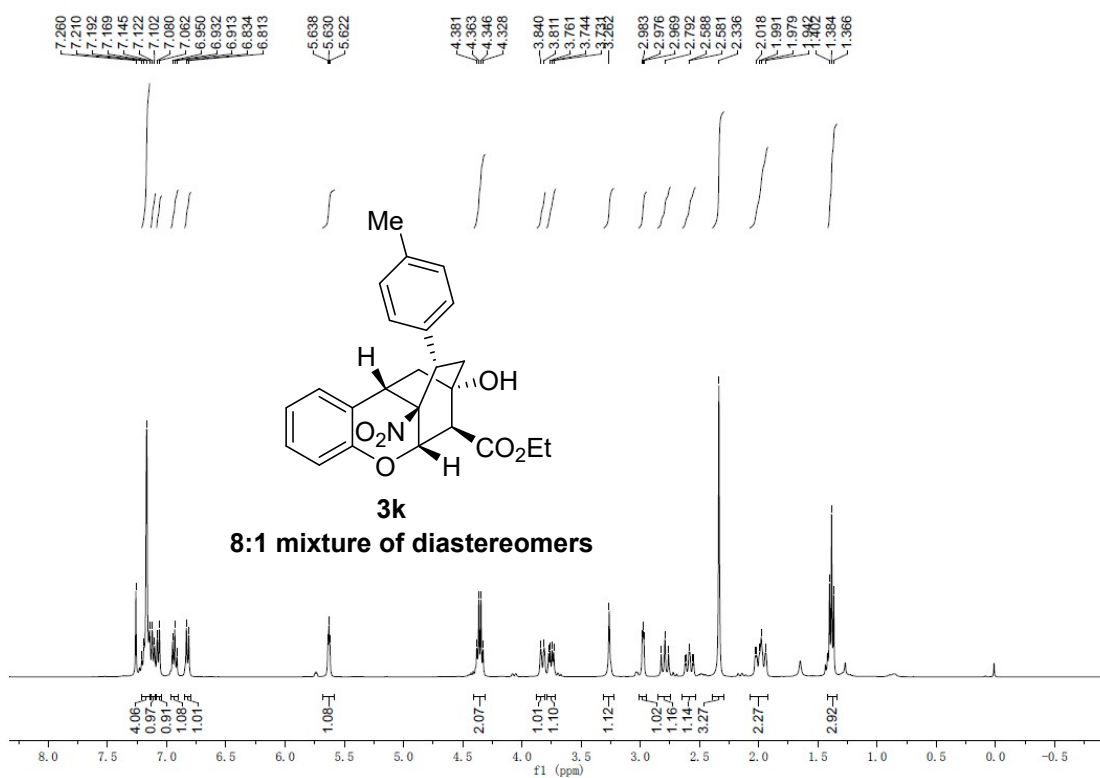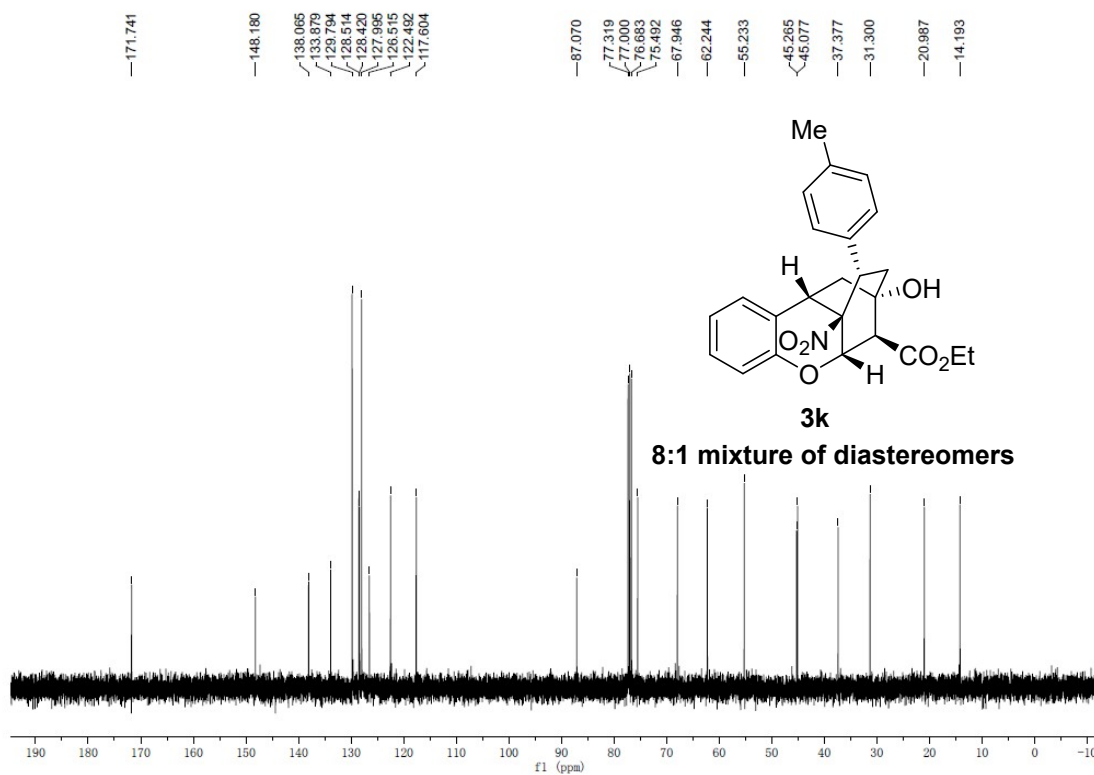

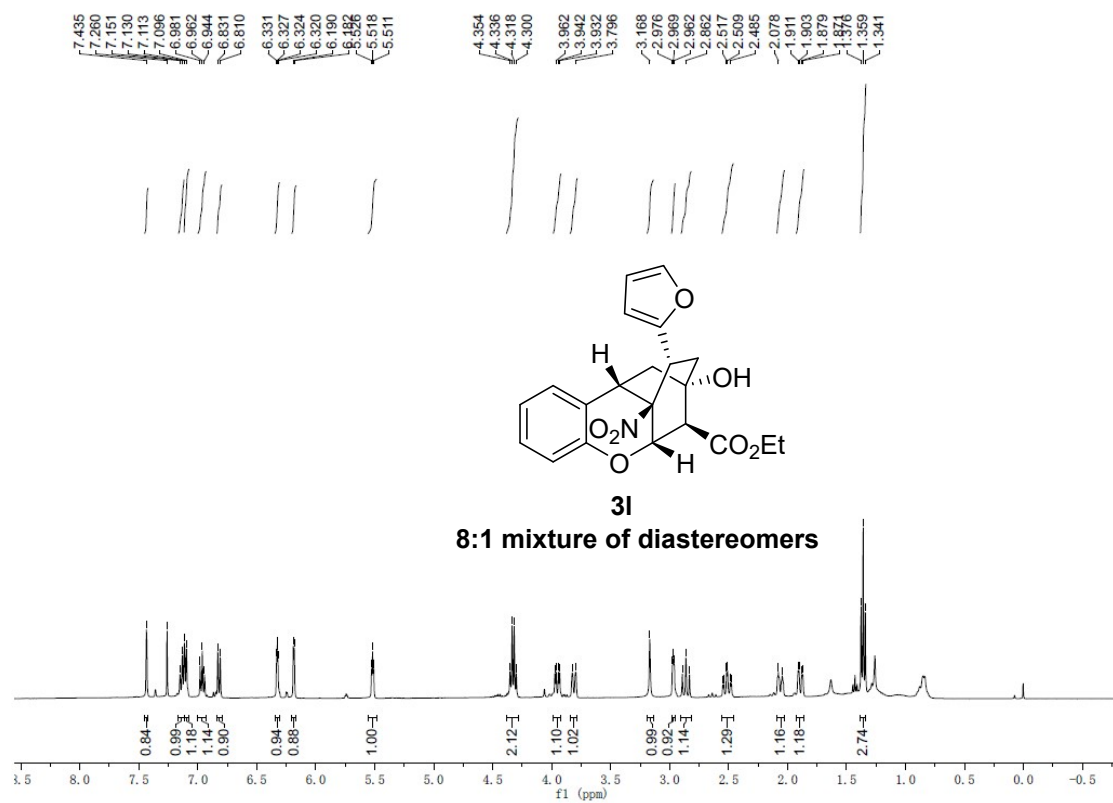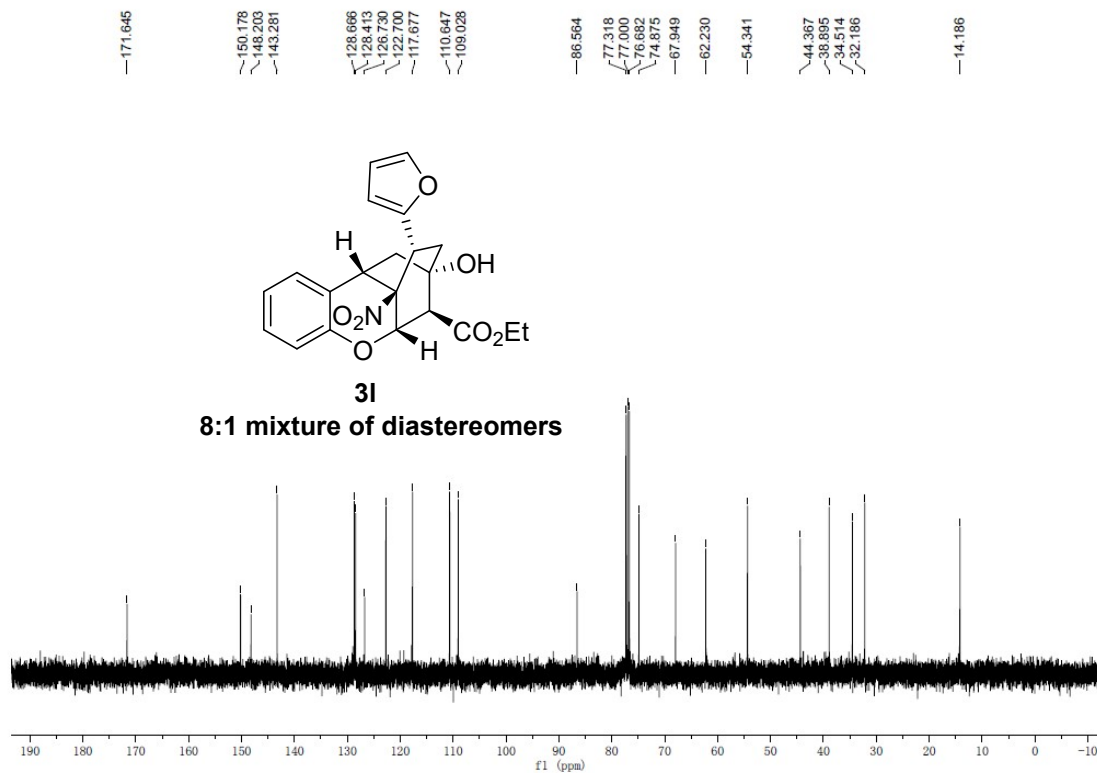

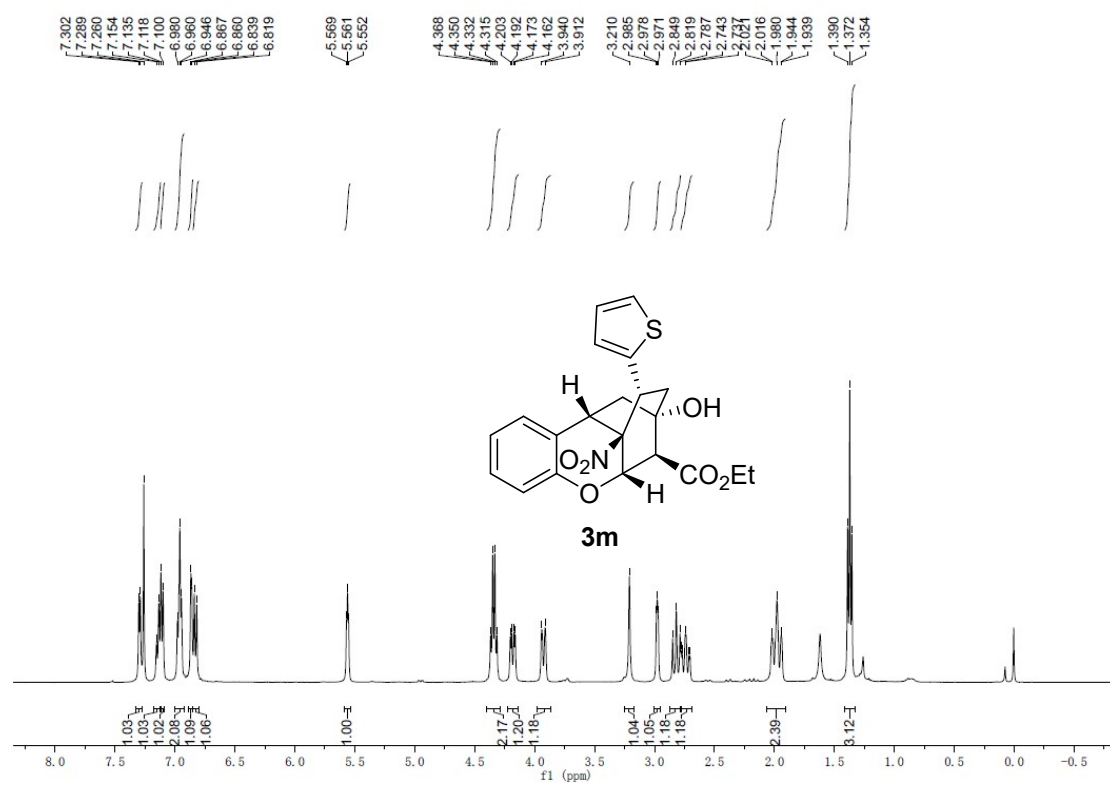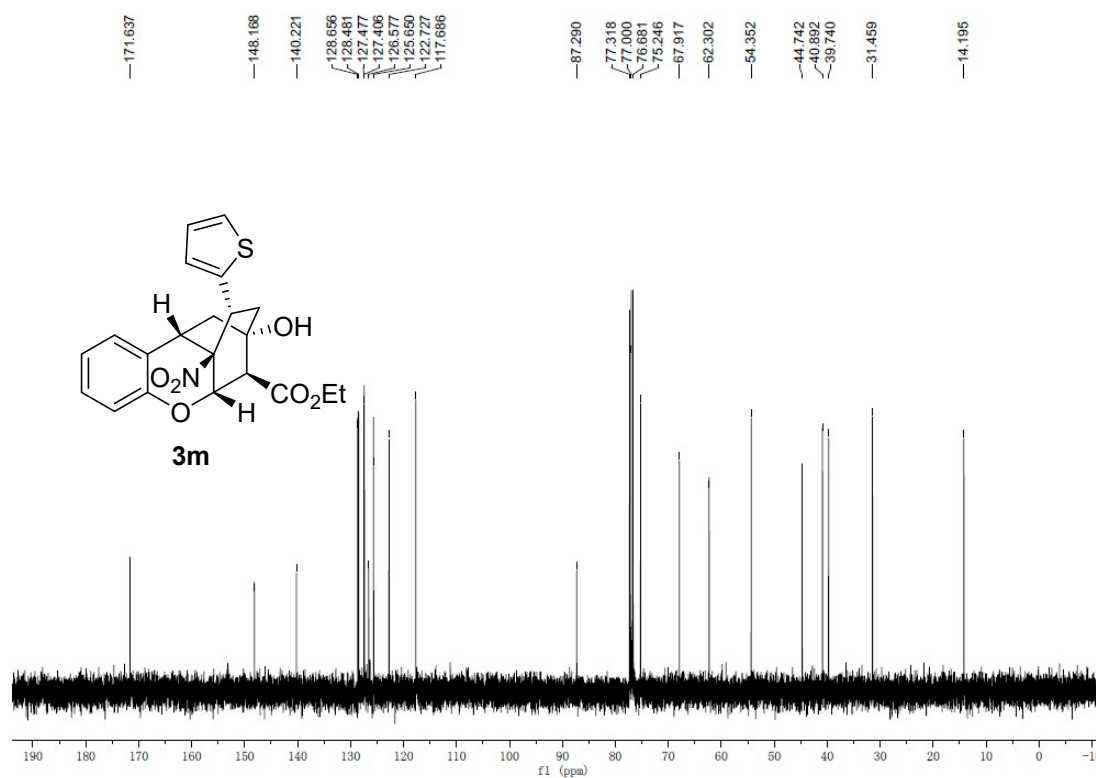

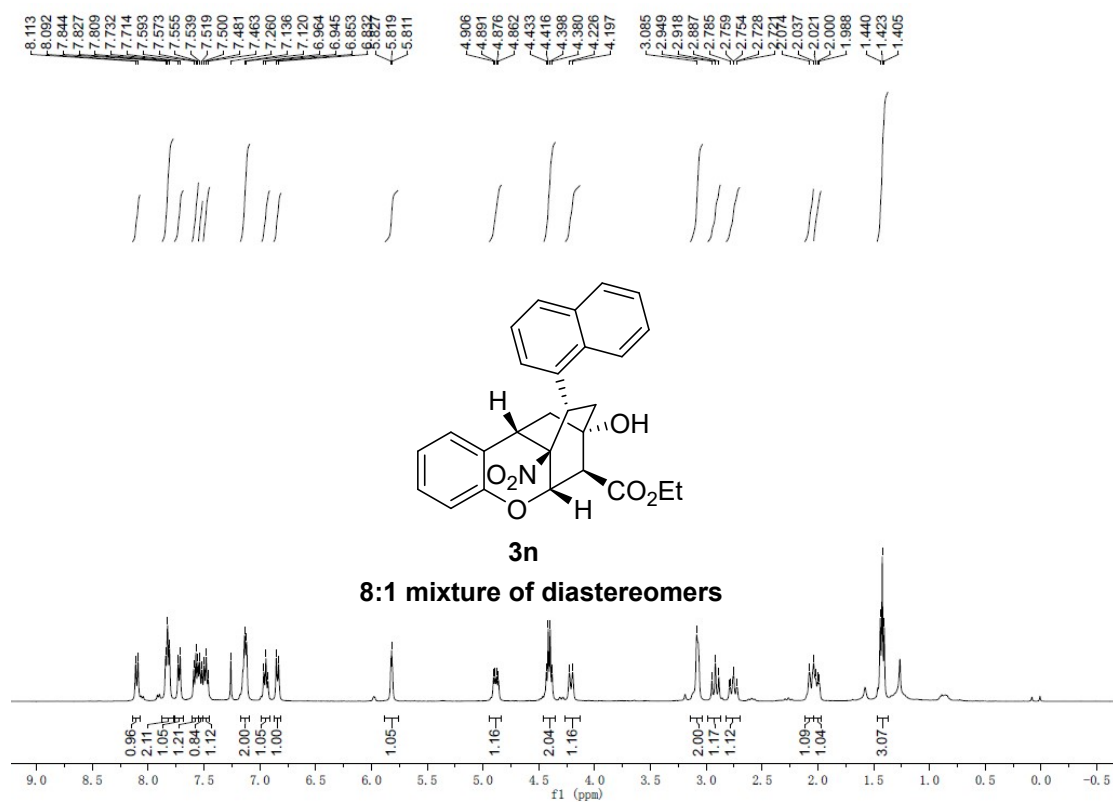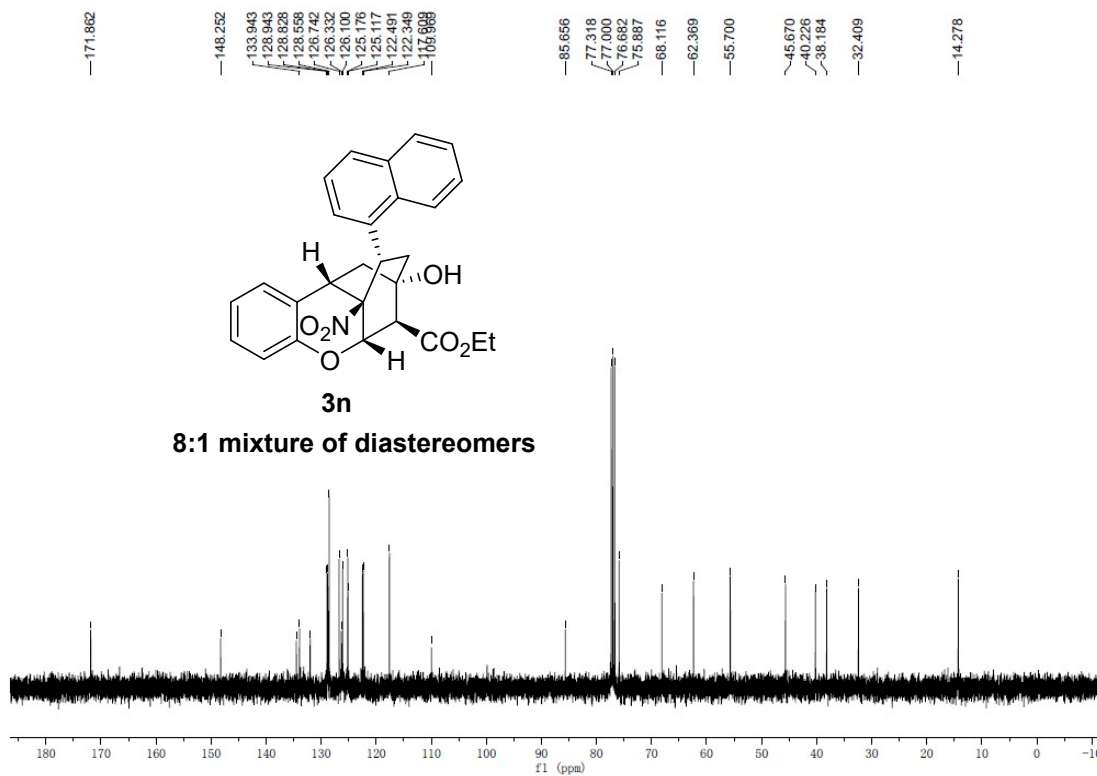

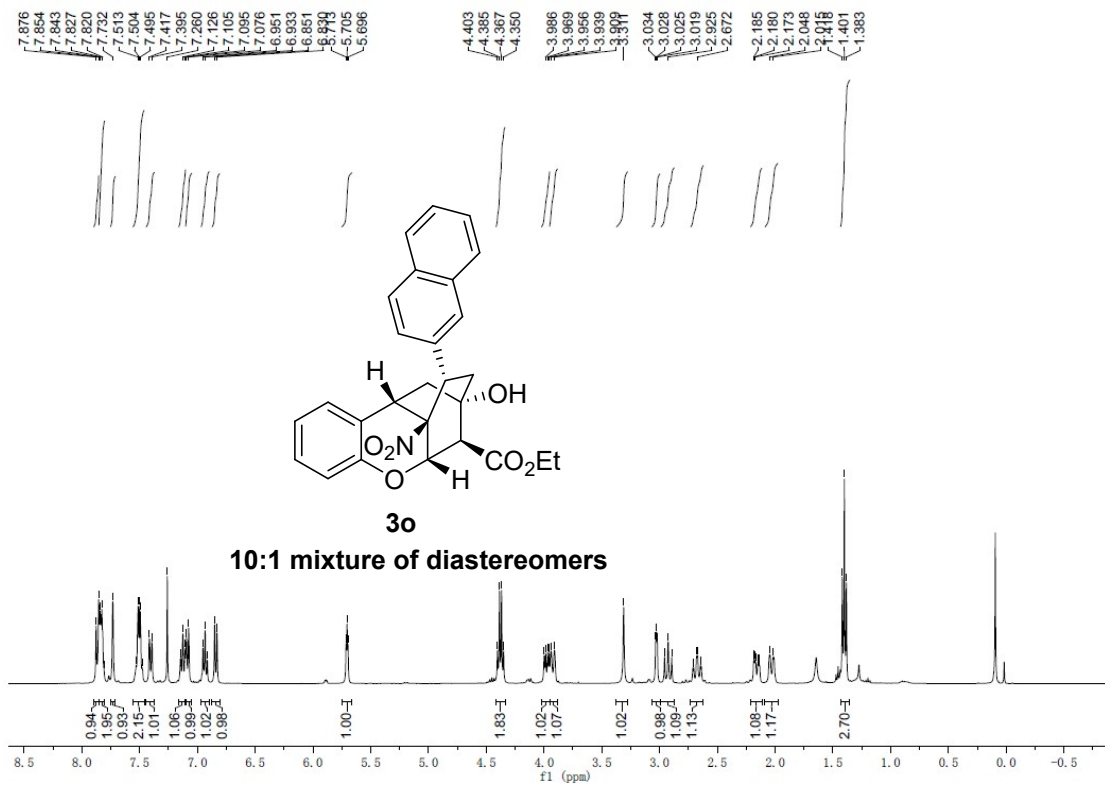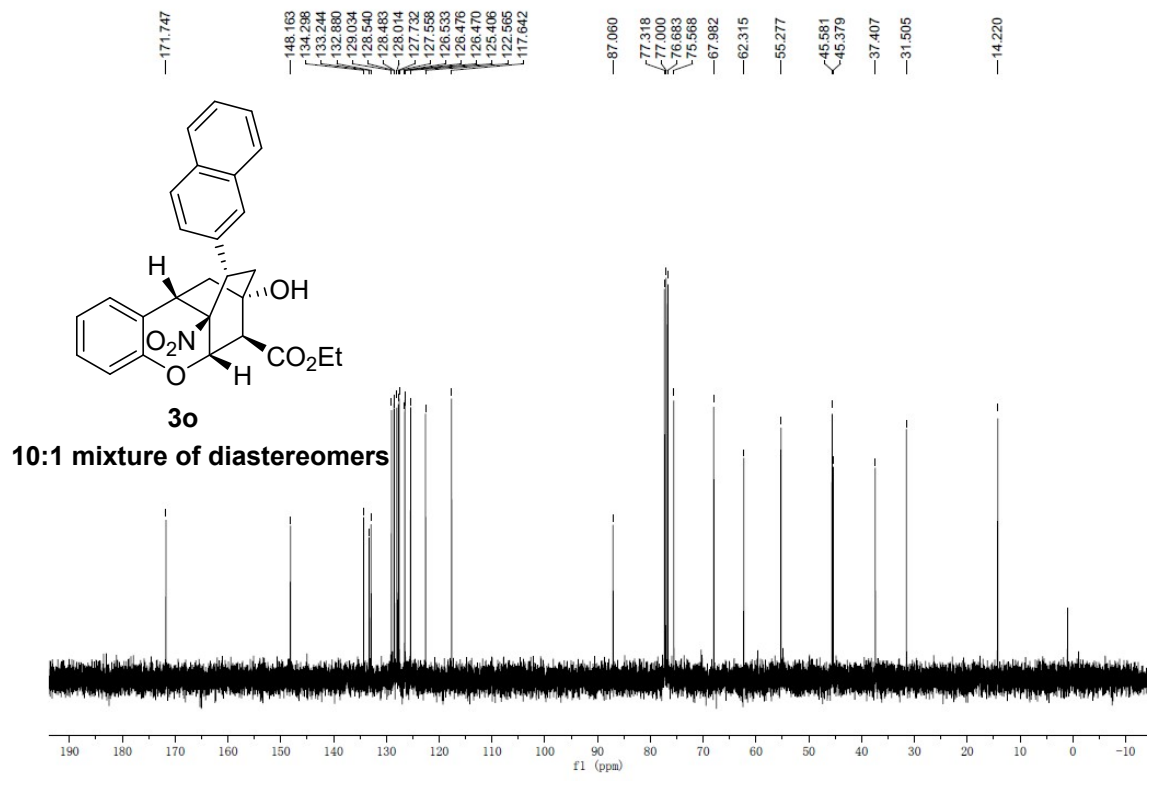

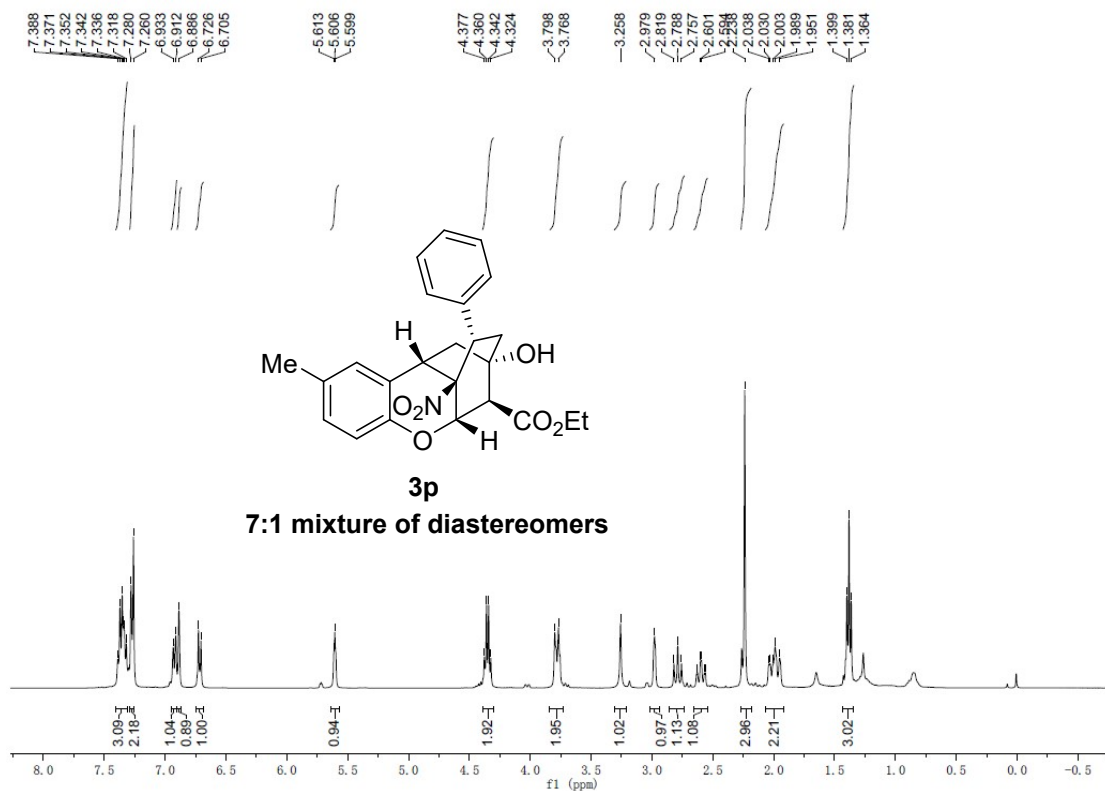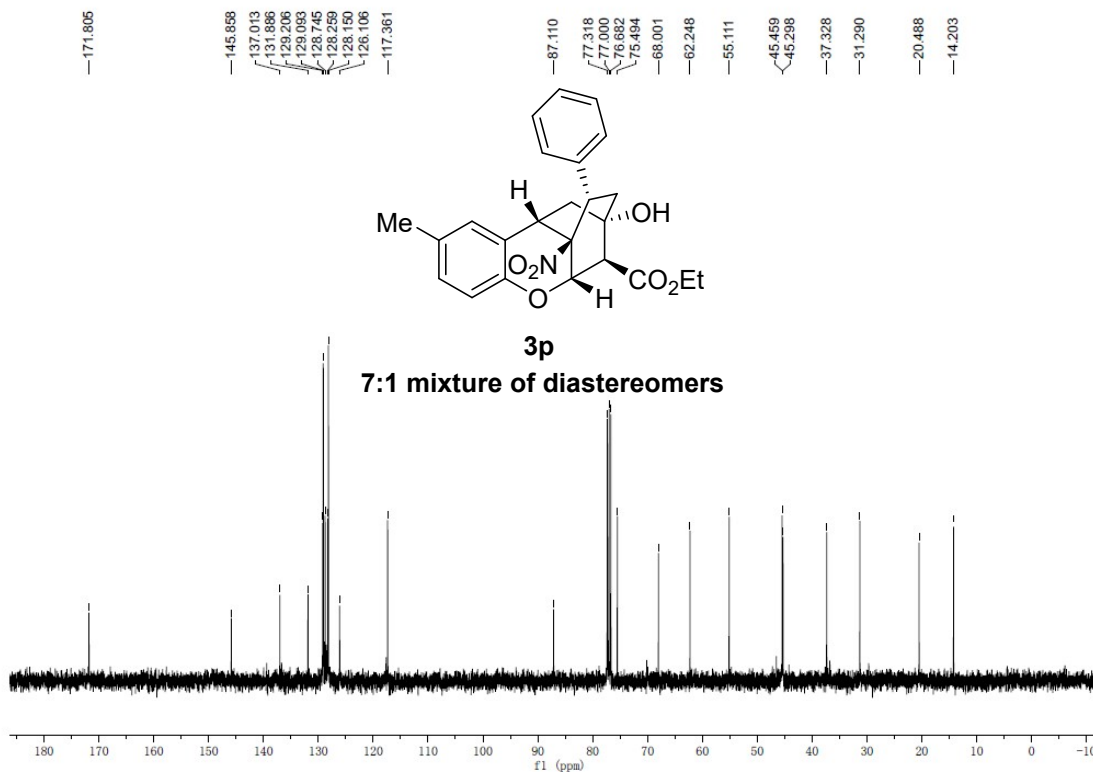

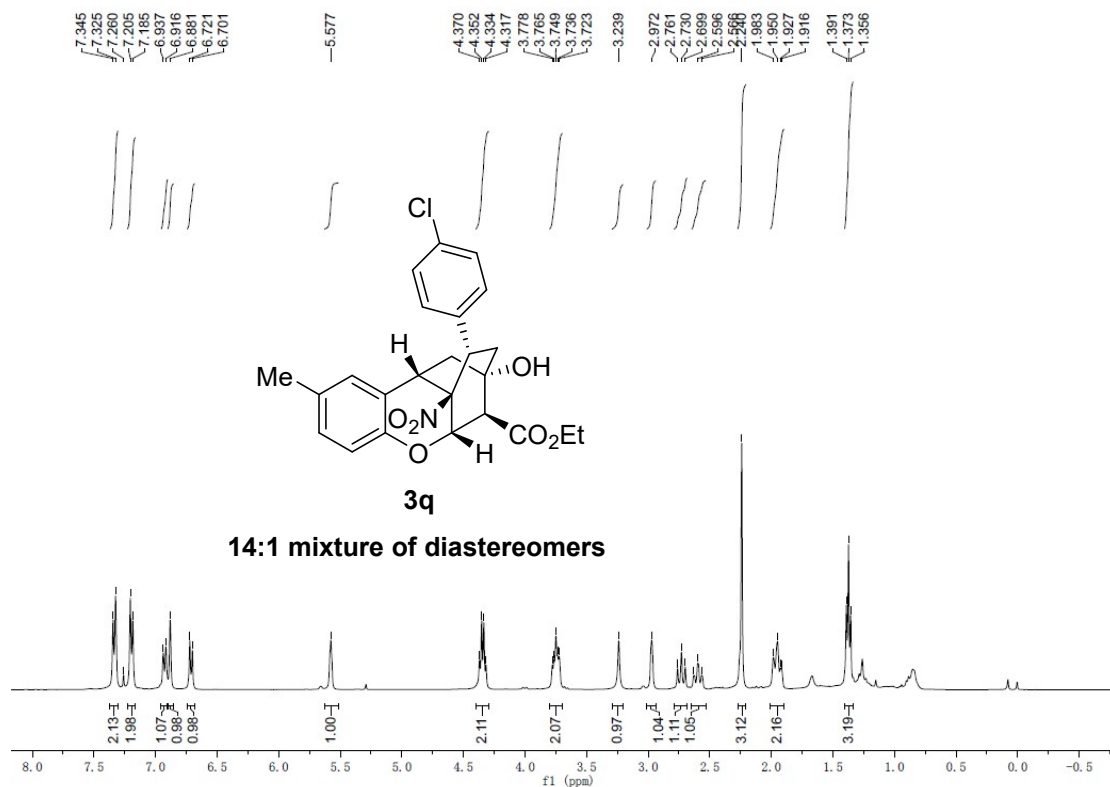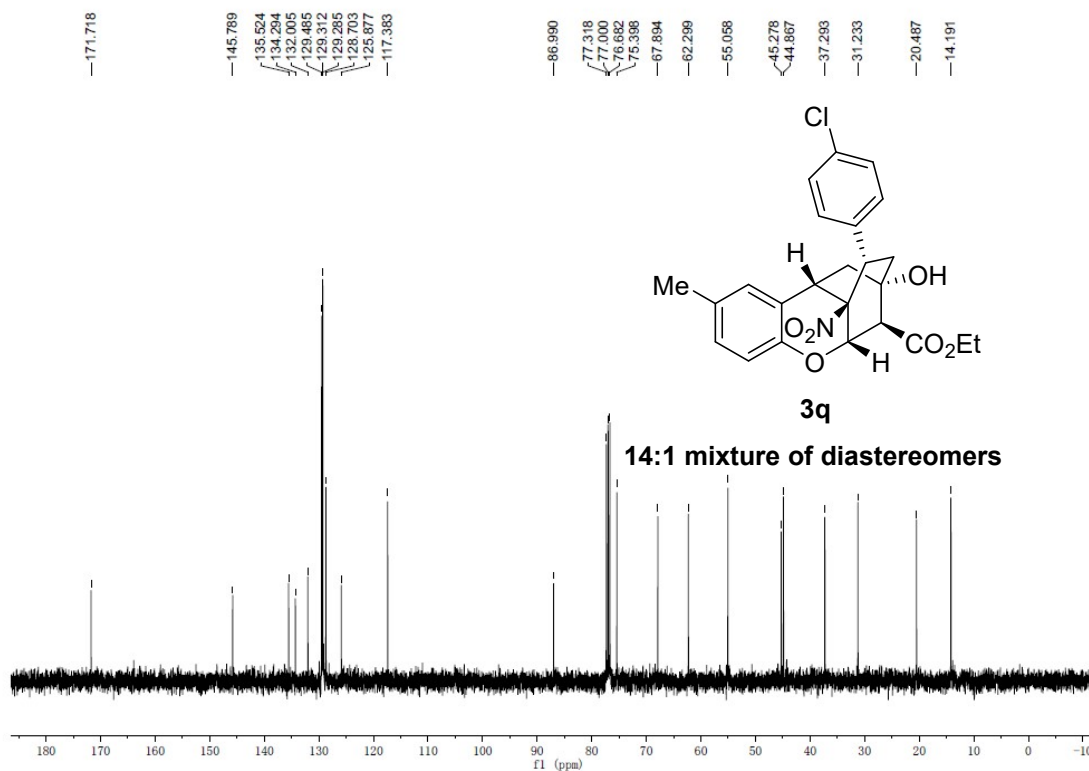



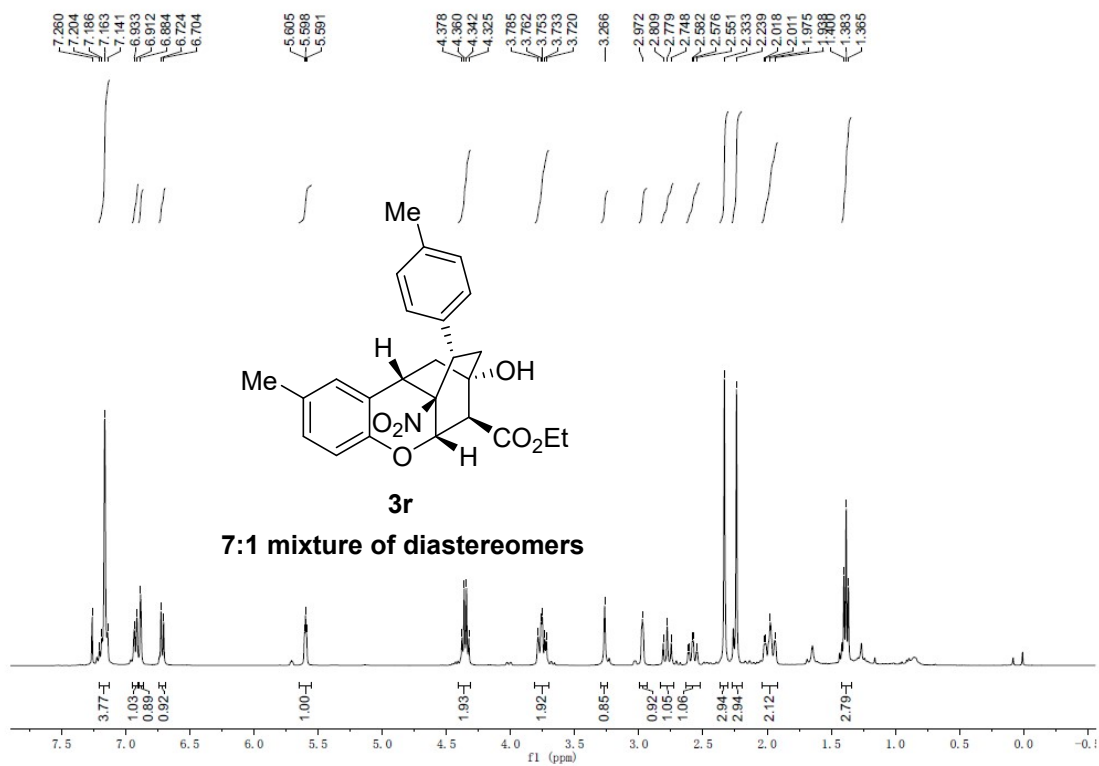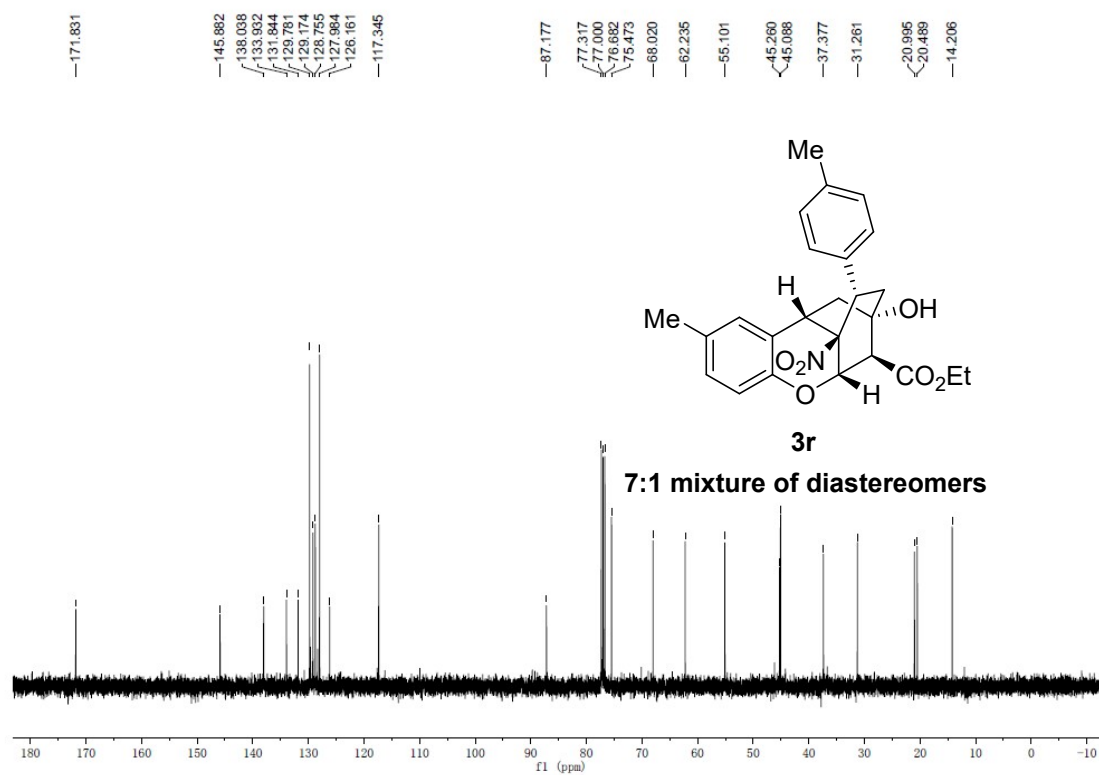

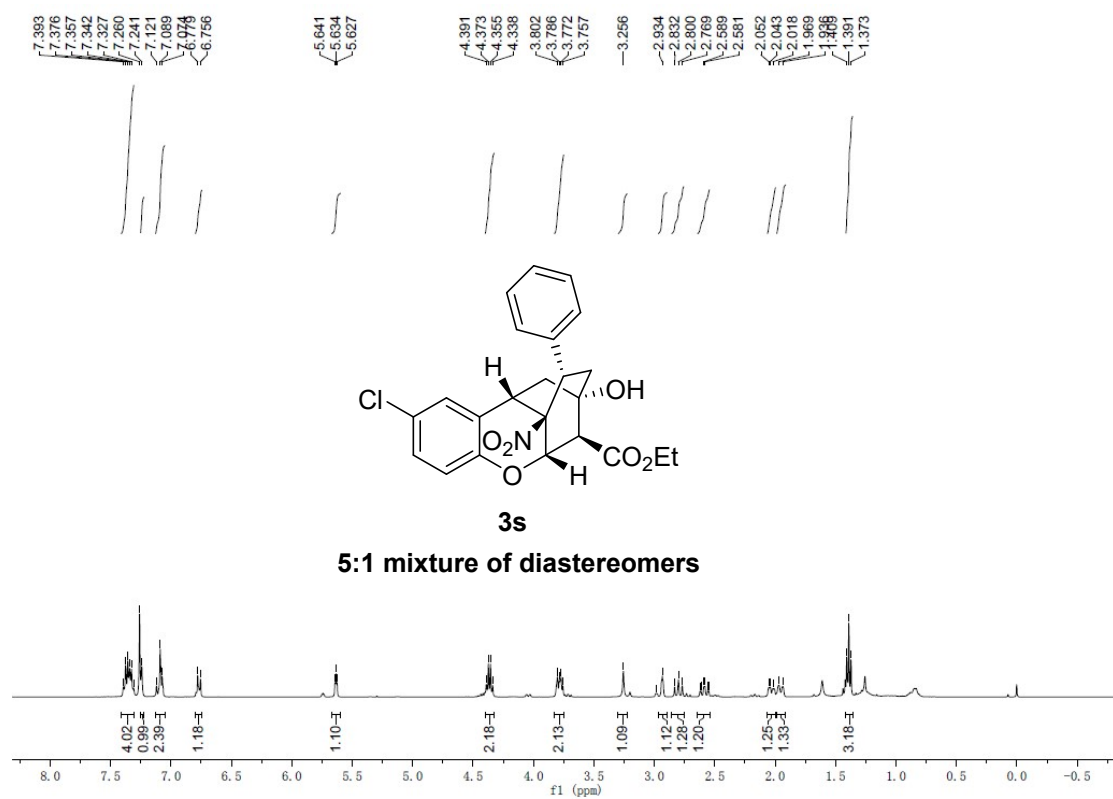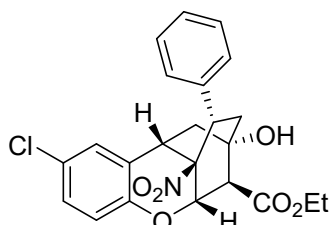

**3s**

**5:1 mixture of diastereomers**

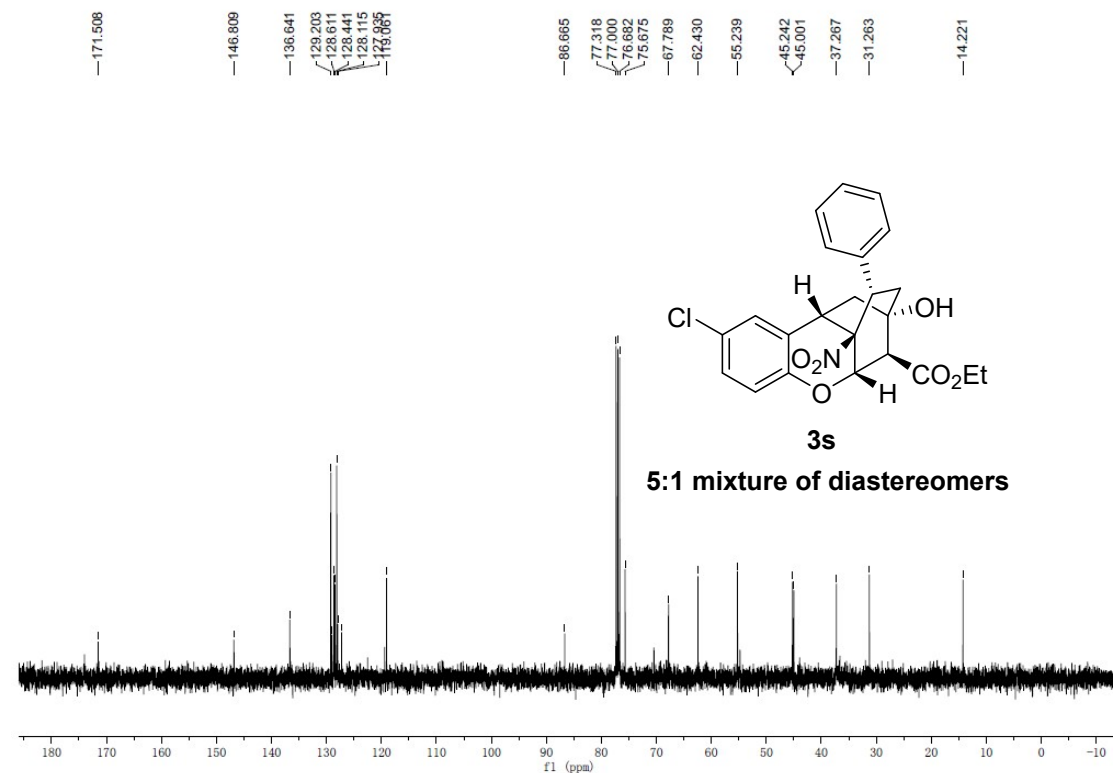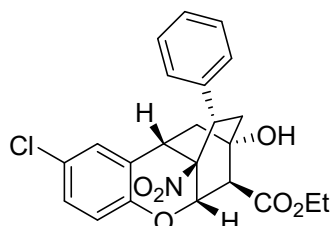

**3s**

**5:1 mixture of diastereomers**

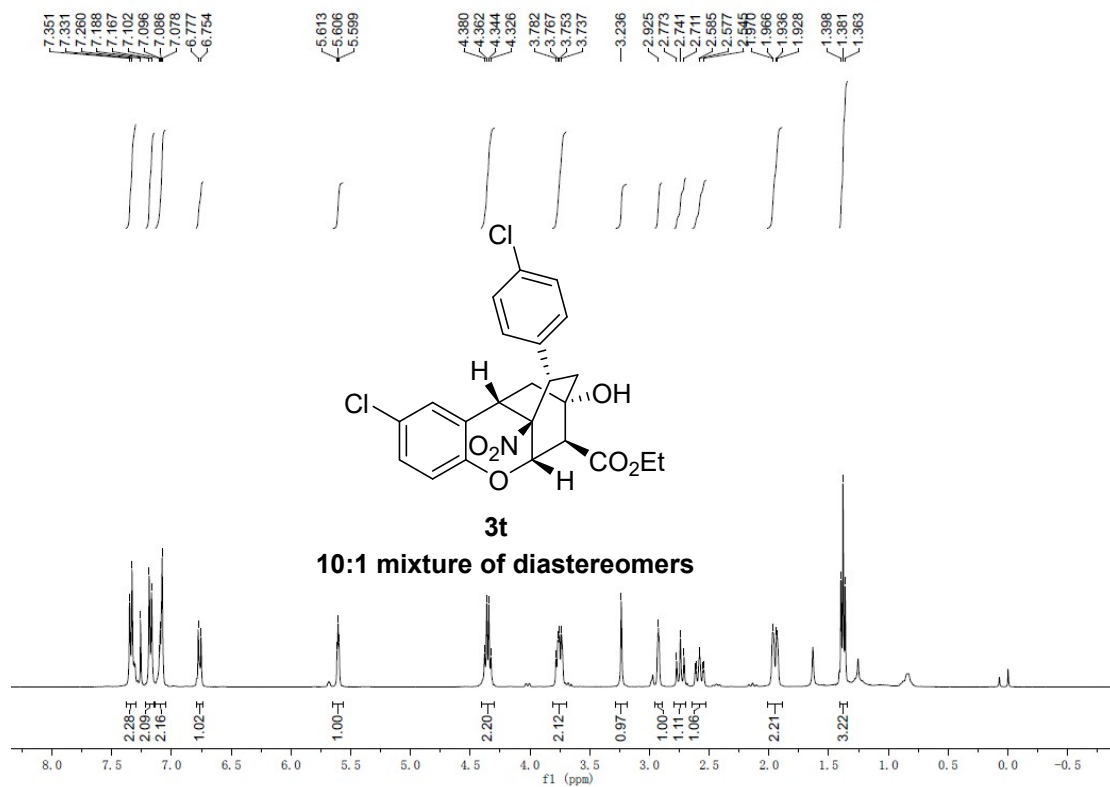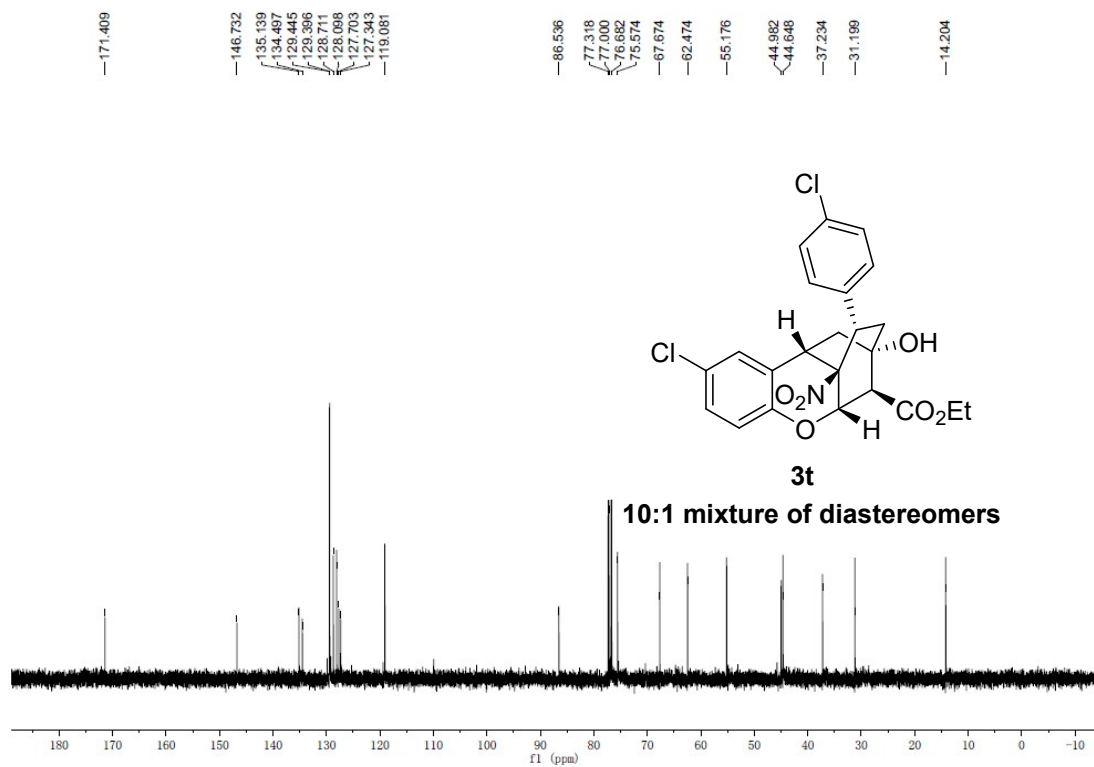

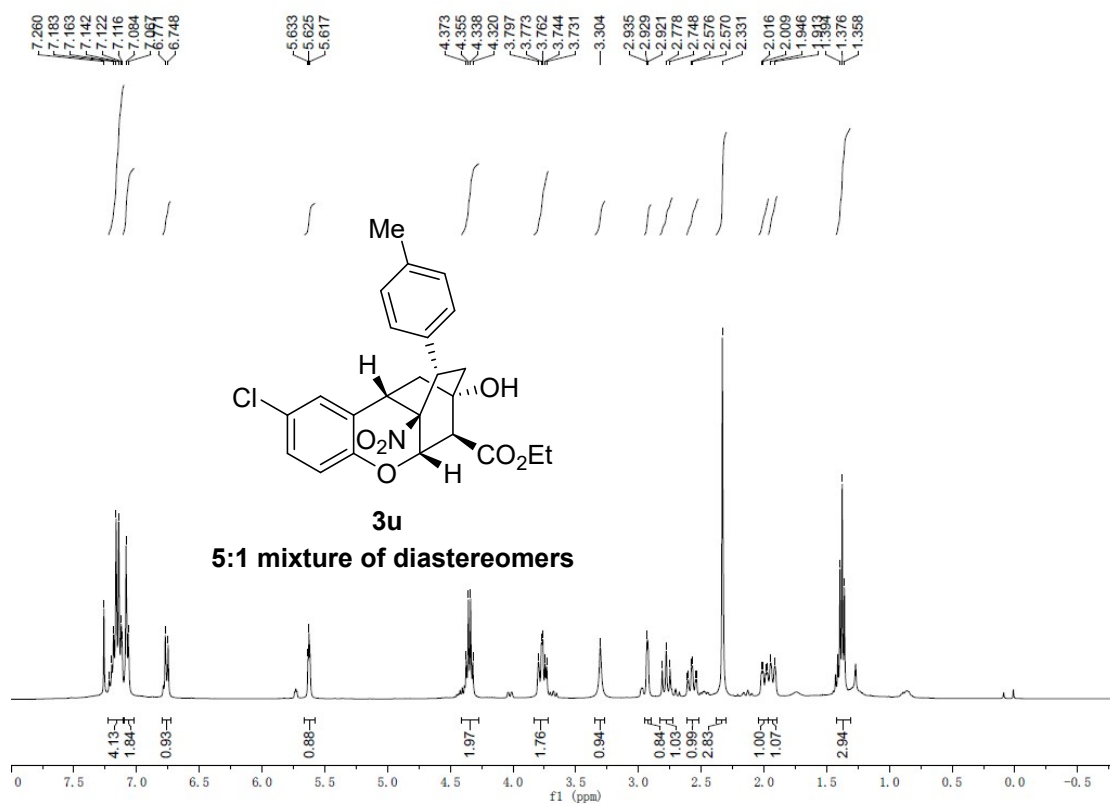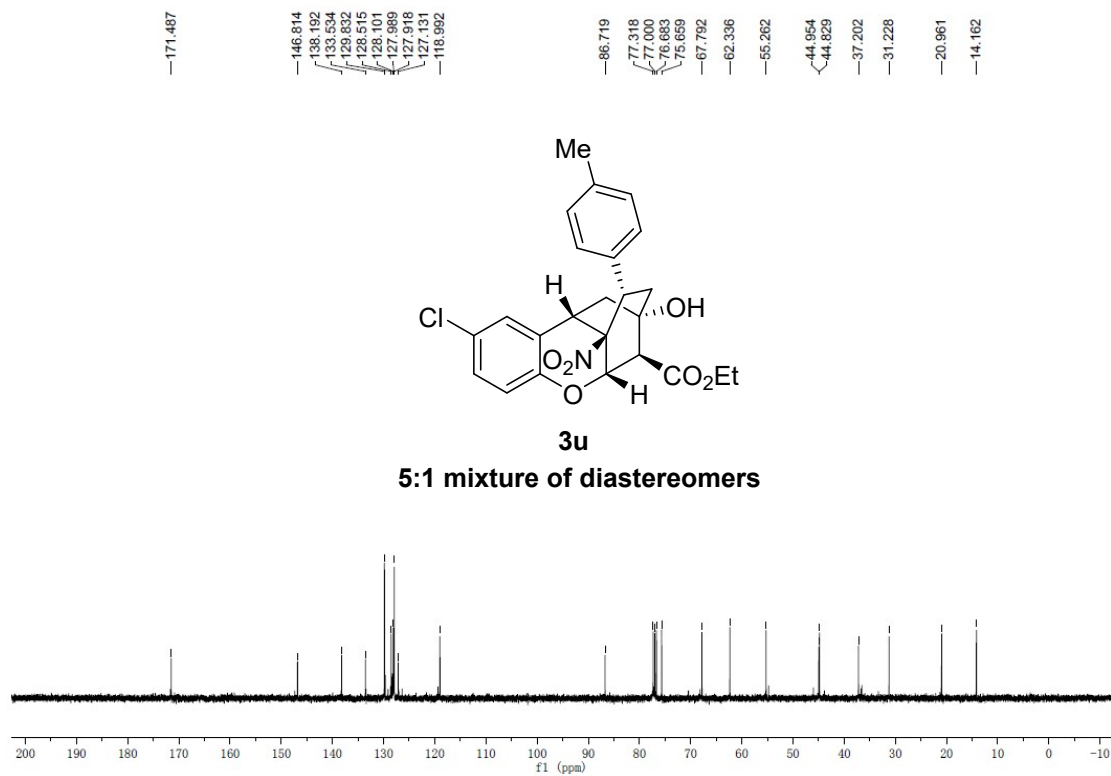

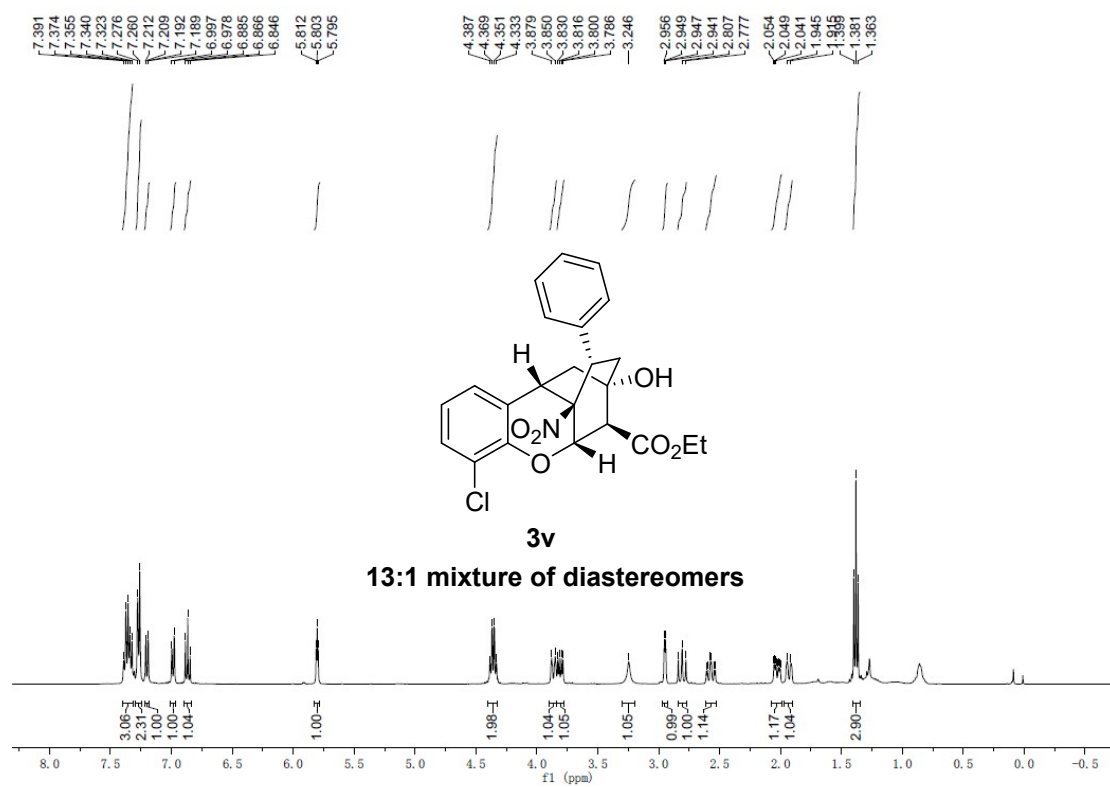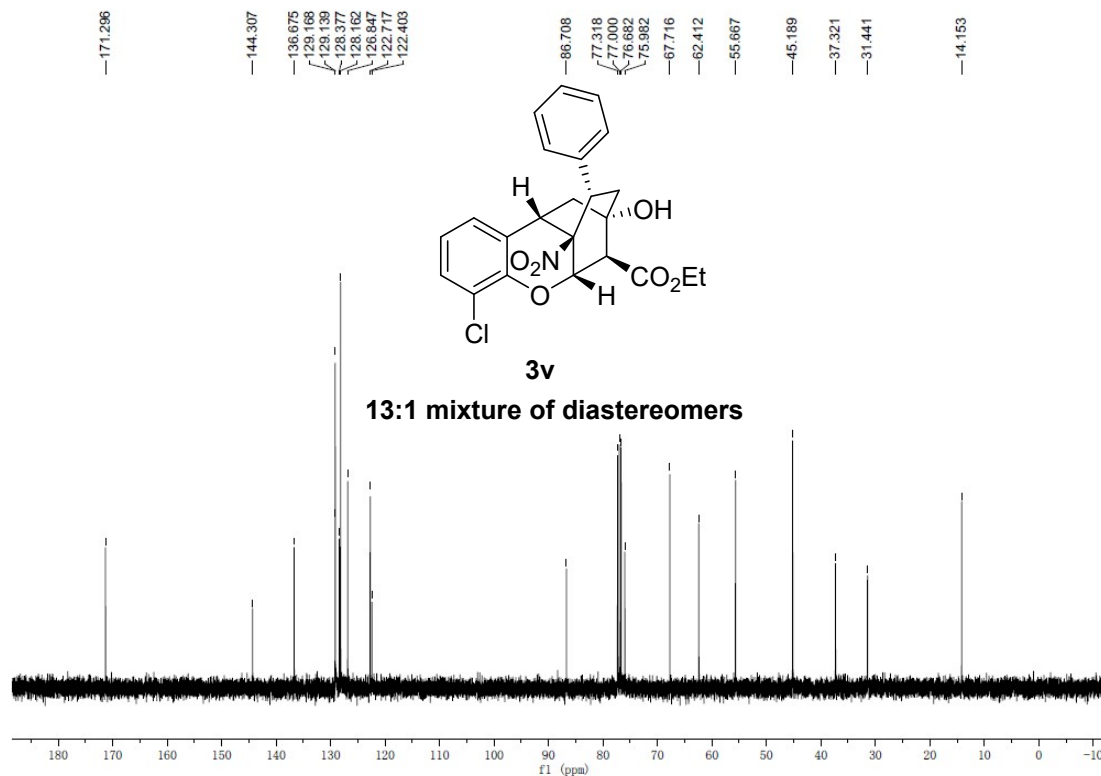

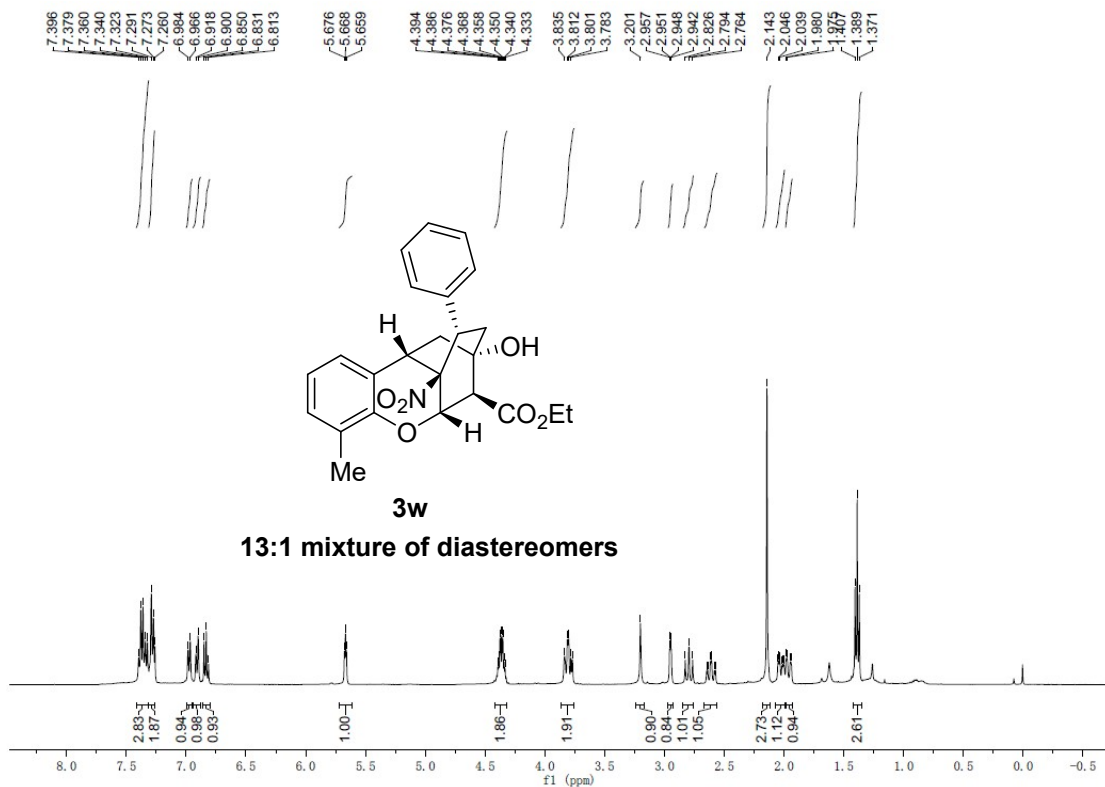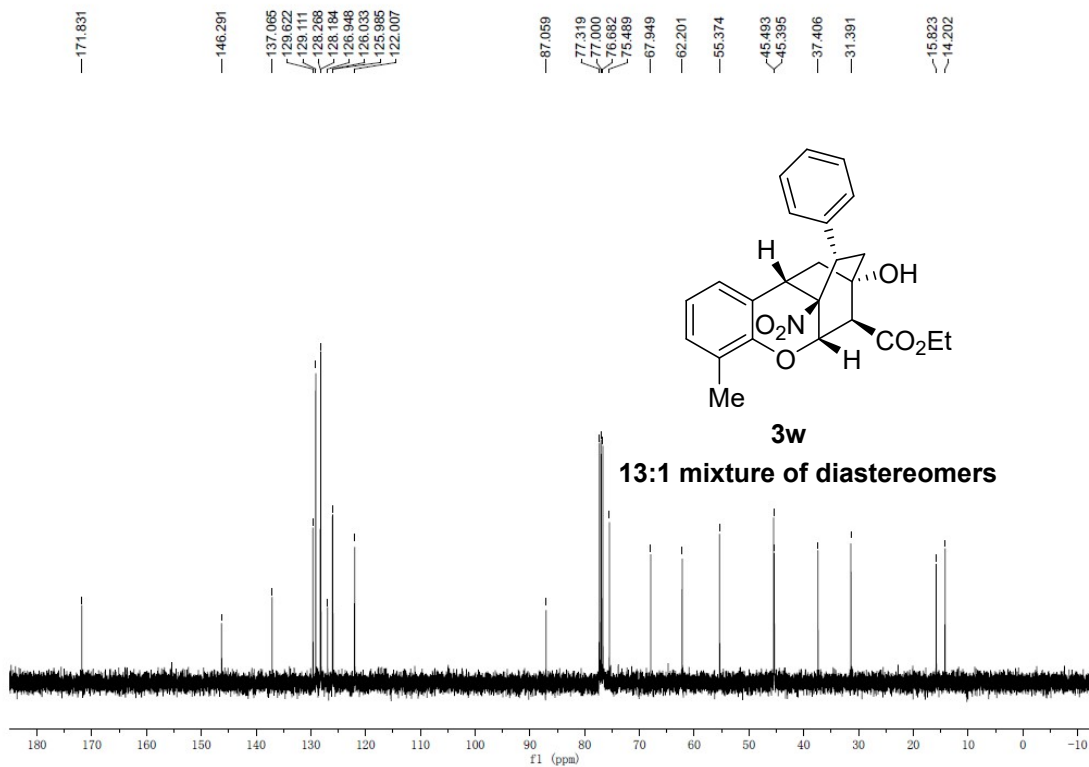

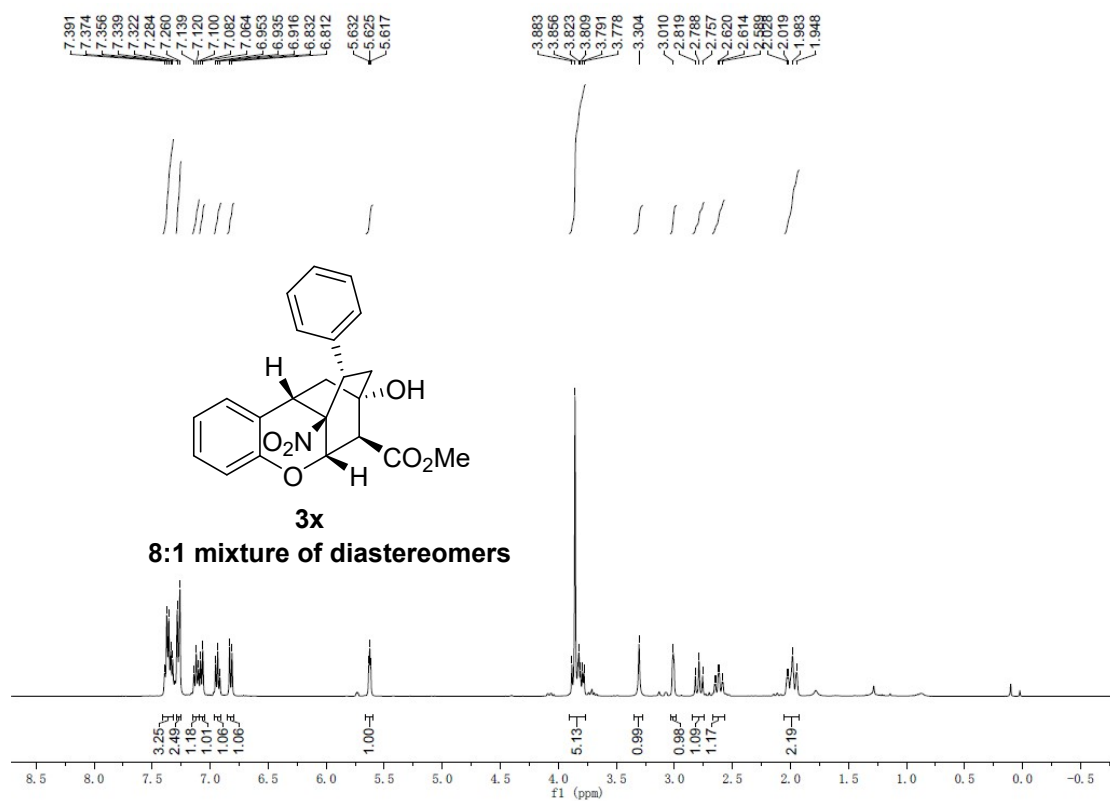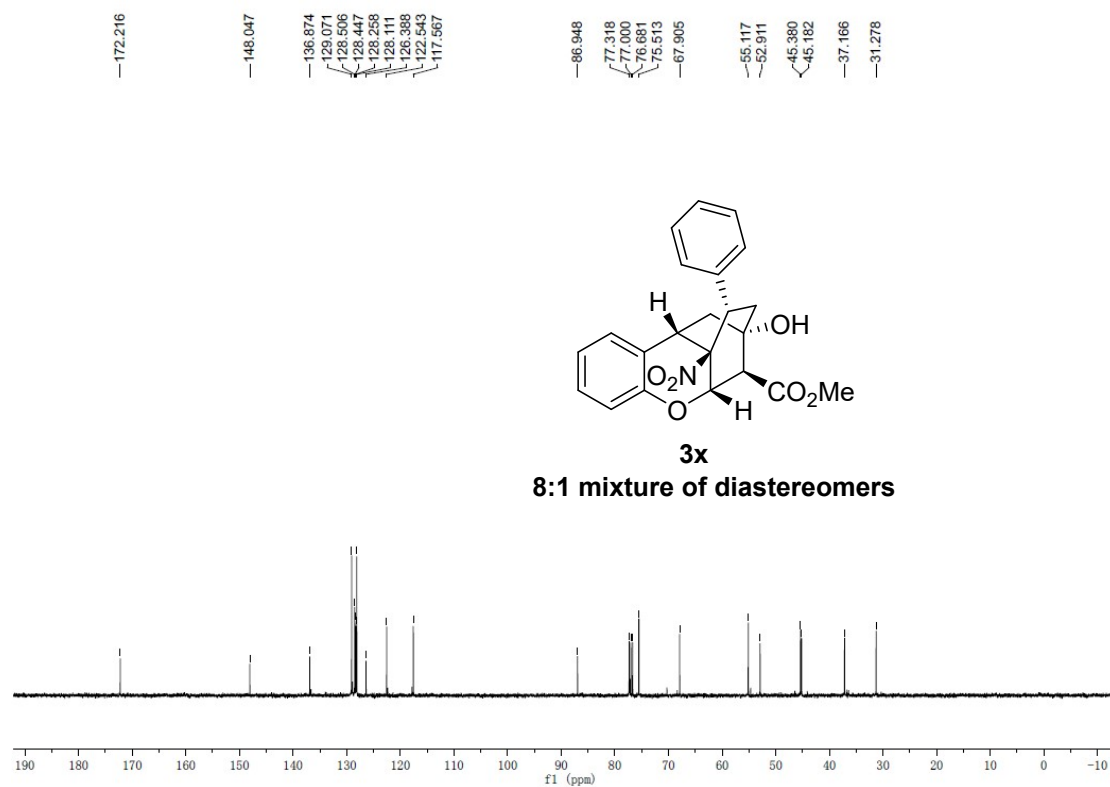

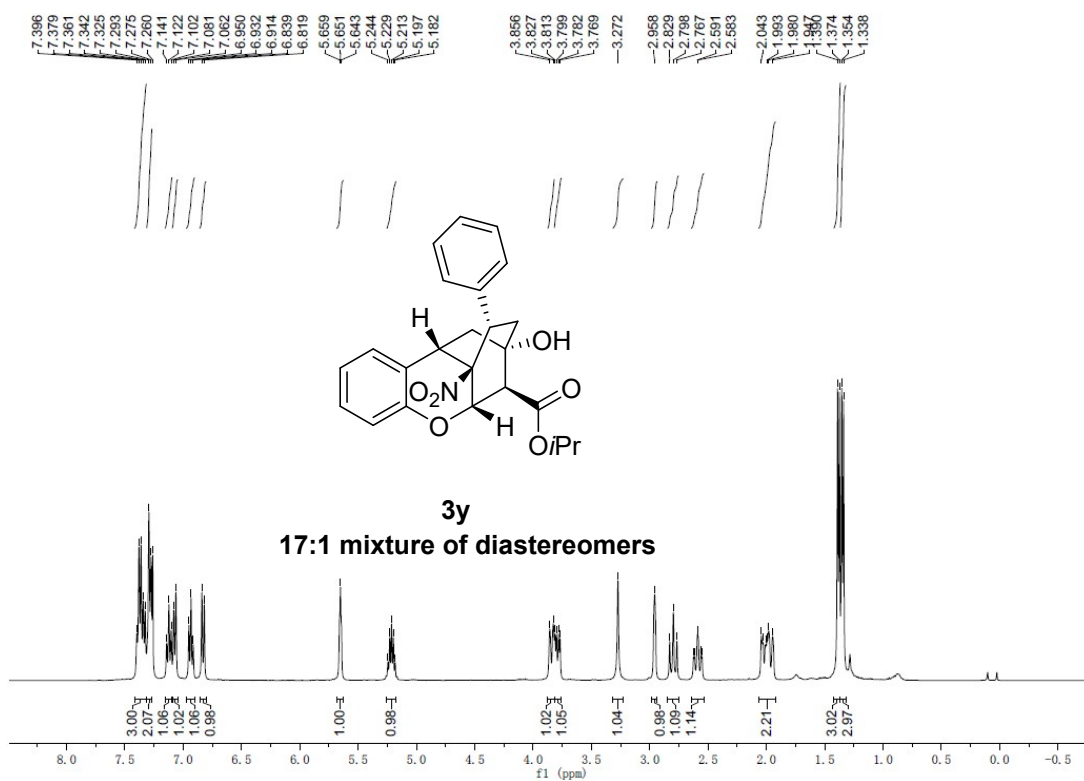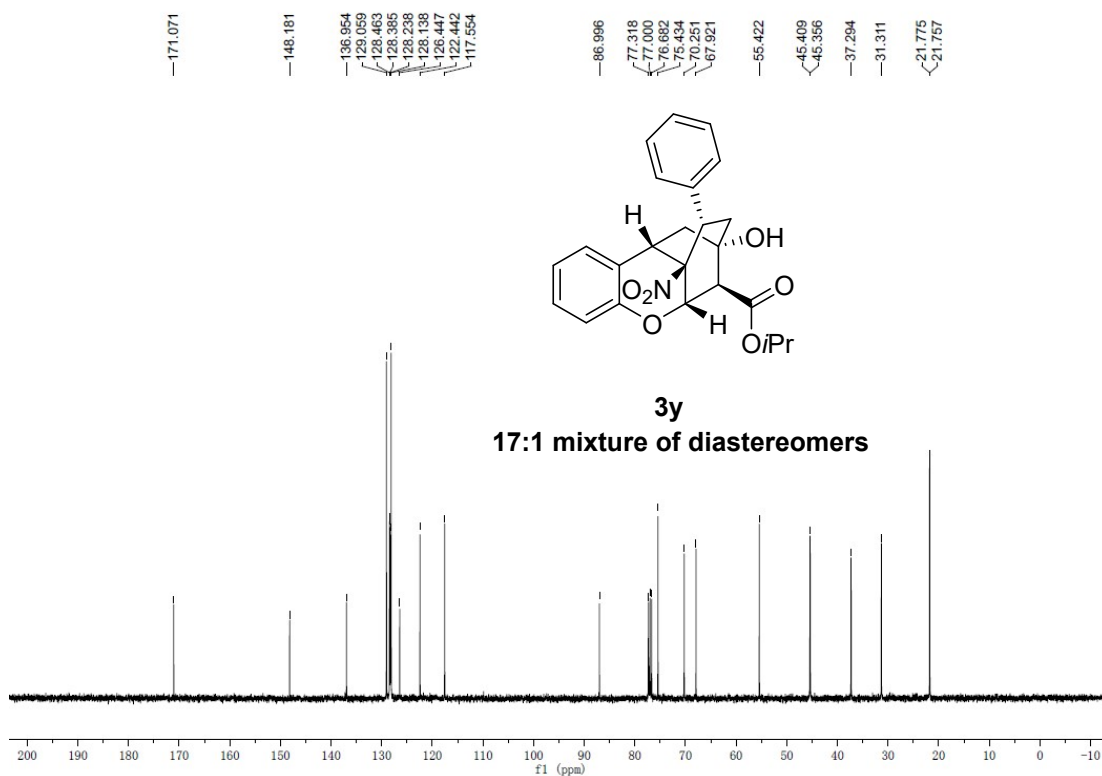



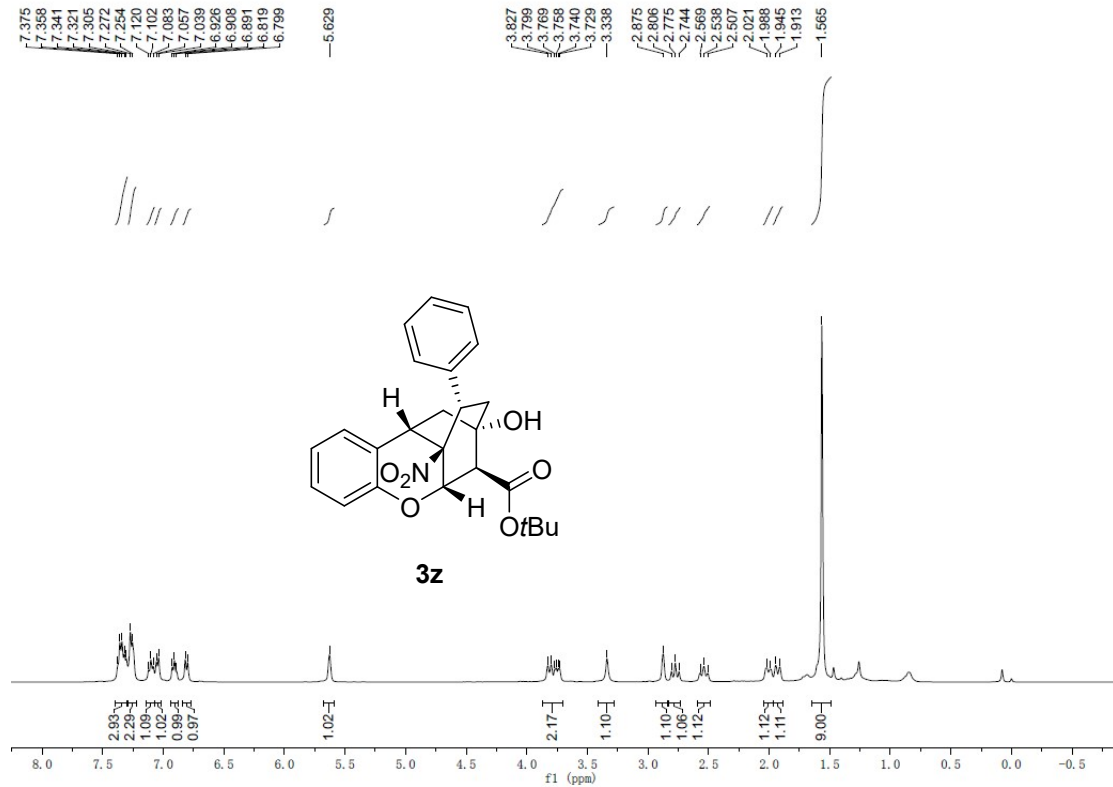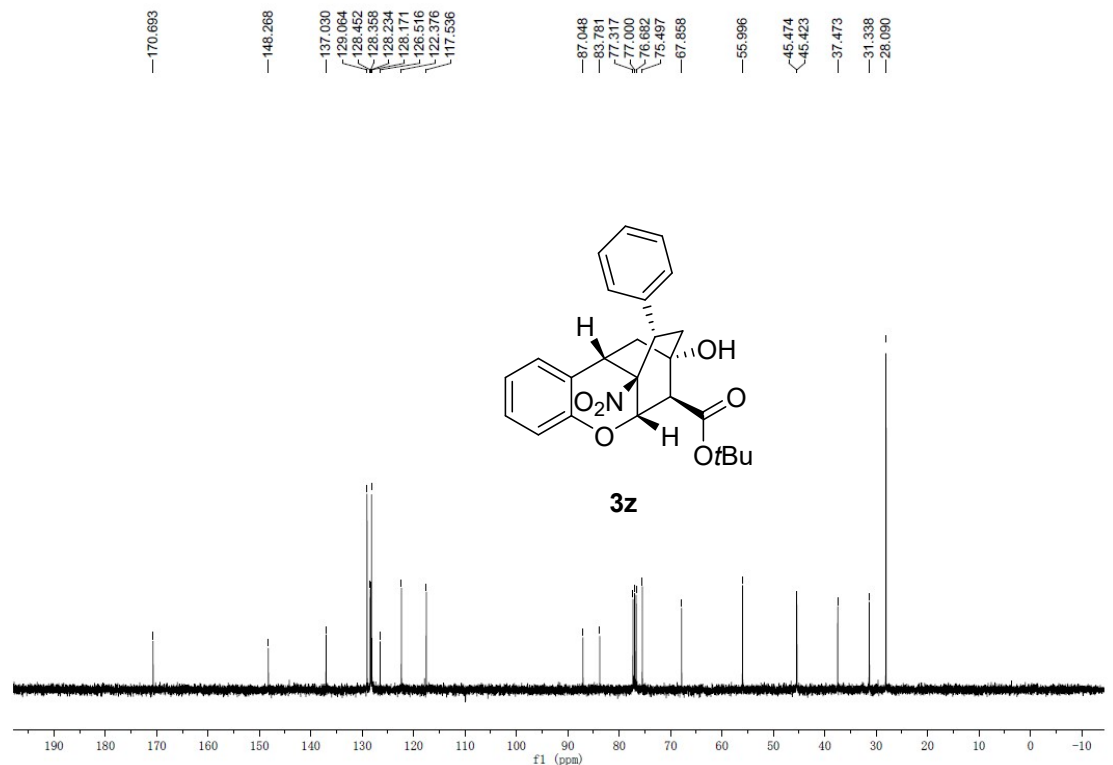

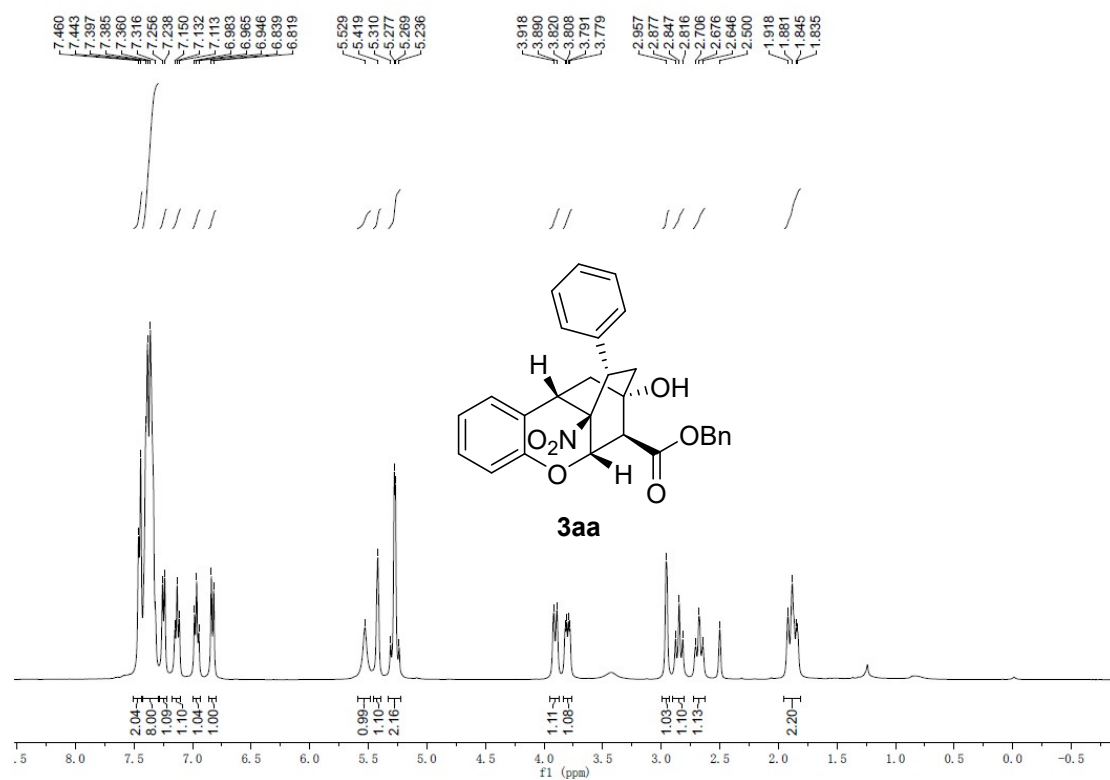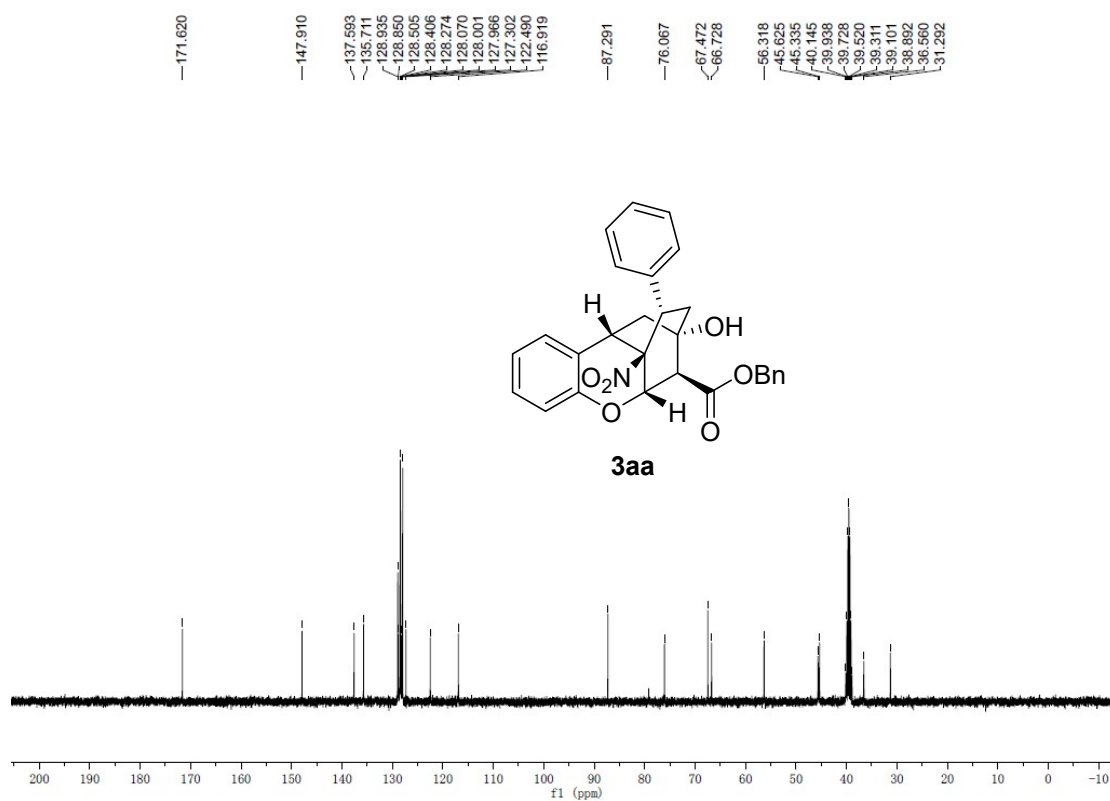

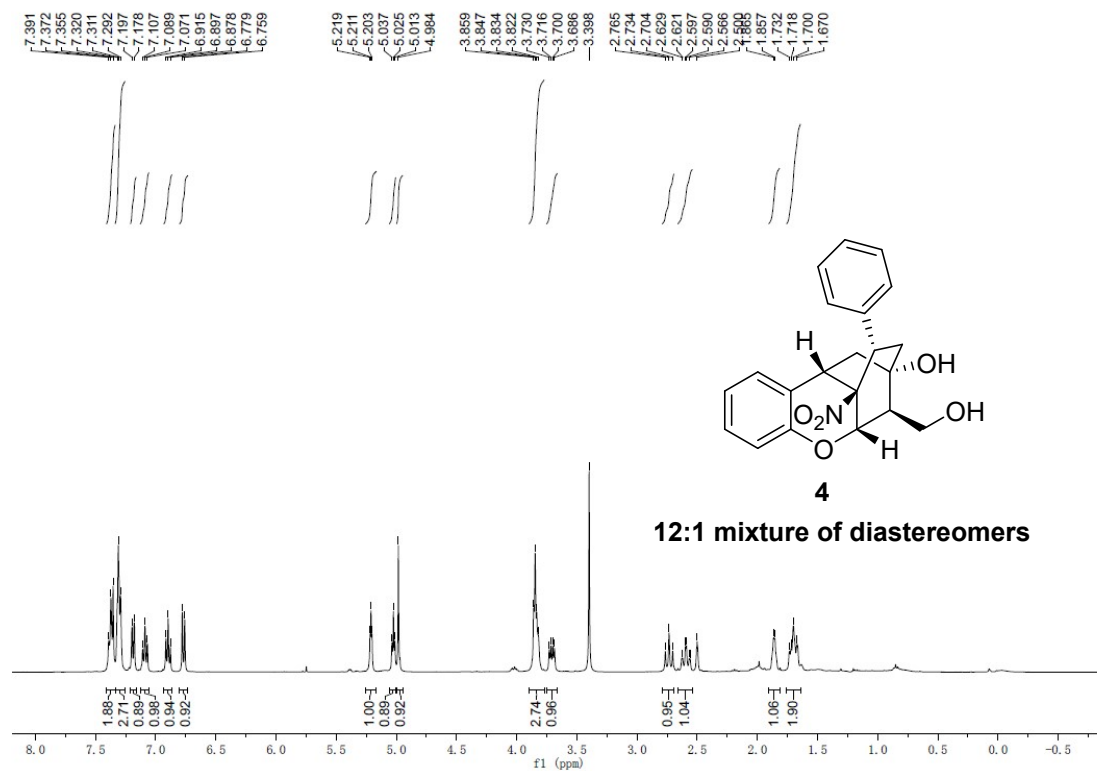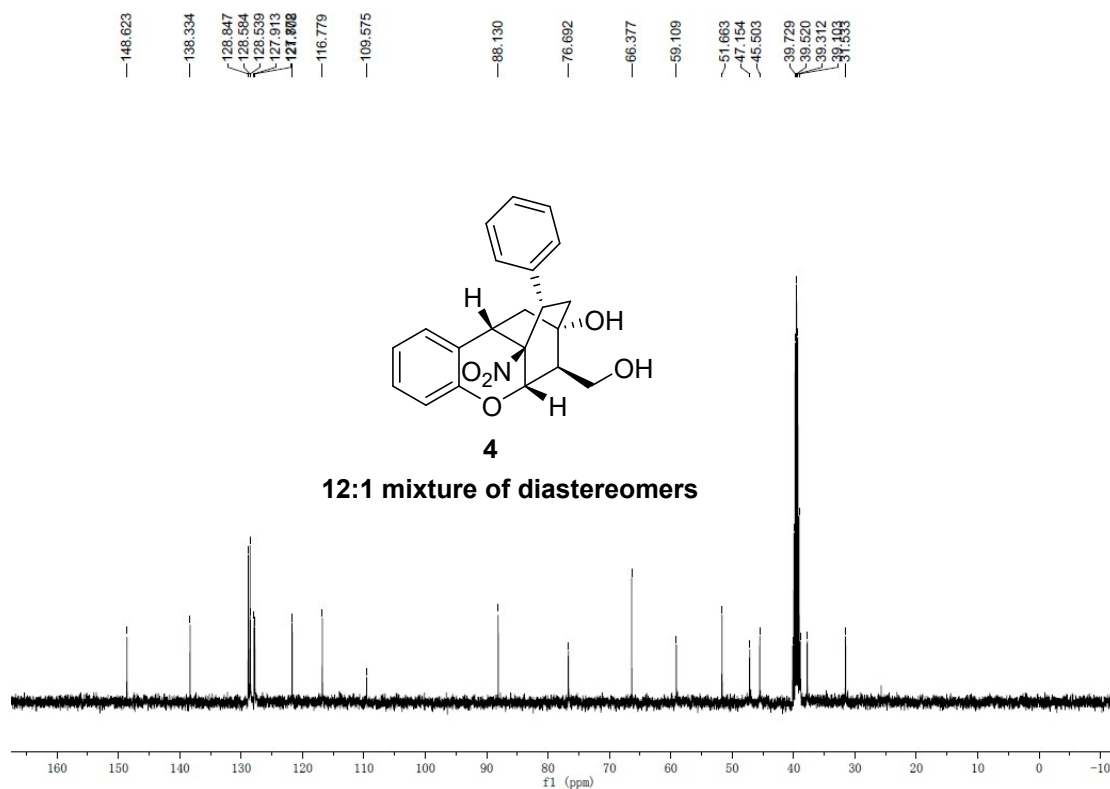

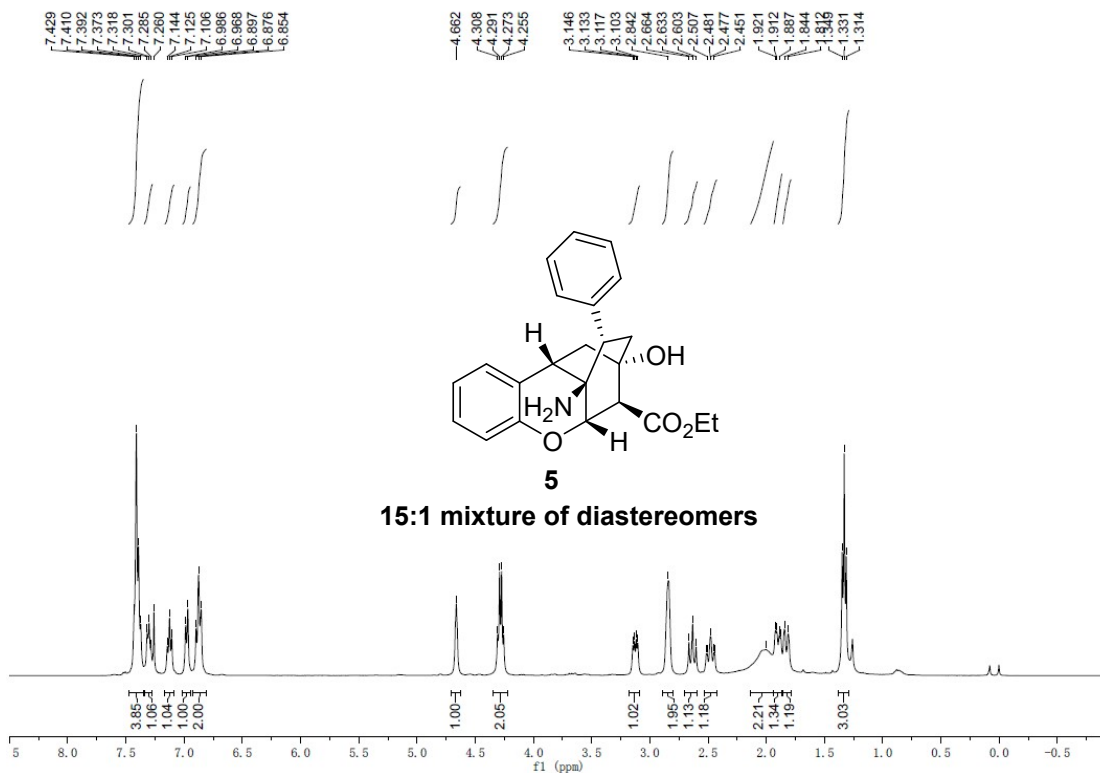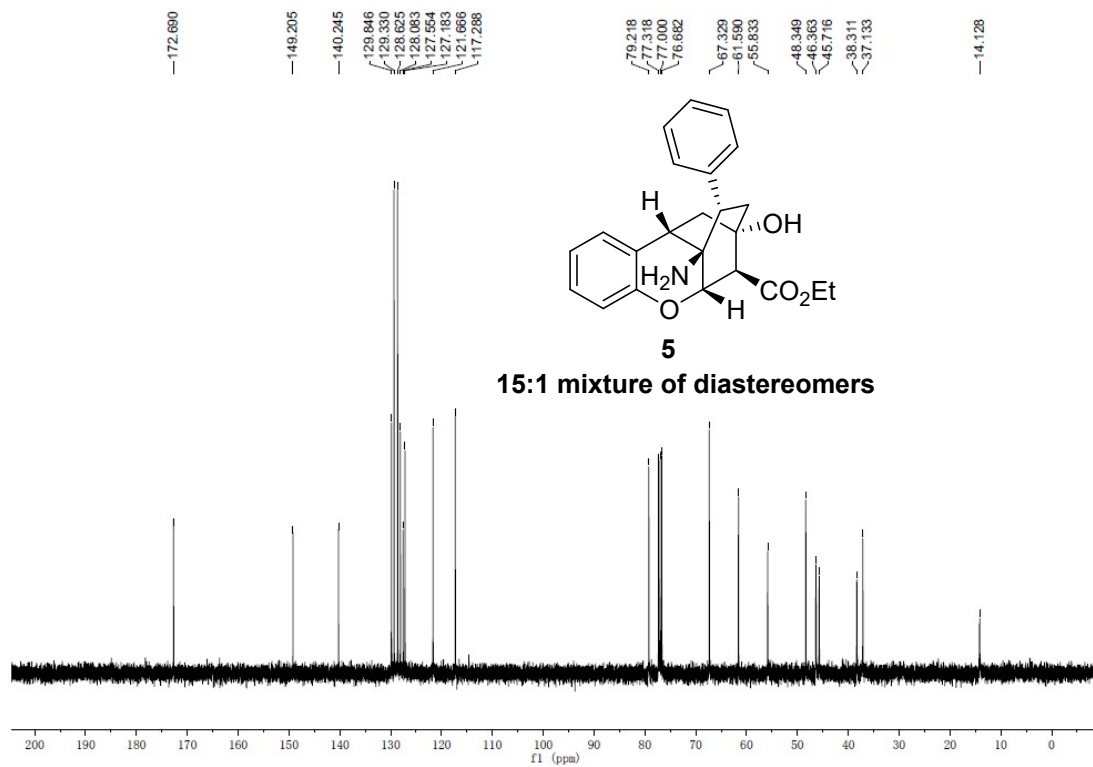

Supplement: d2ob00326k1.pdf [file d2ob00326k1.pdf]
